# Supplementary material for: Vegan diet in young children remodels metabolism and challenges the statuses of essential nutrients
Source: PubMed Central journal article supplement (PMC7863396; doi:10.15252/emmm.202013492), 2021-01-20
Supplement: EMMM-13-e13492-s001.pdf [file EMMM-13-e13492-s001.pdf]

# Vegan diet in young children remodels metabolism and challenges the statuses of essential nutrients

## Appendix

### Contents

|                                                                                                                 |           |
|-----------------------------------------------------------------------------------------------------------------|-----------|
| <b>Appendix Supplementary Methods</b>                                                                           | <b>2</b>  |
| Supplement 1: Analysis of dietary data . . . . .                                                                | 2         |
| Online questionnaires . . . . .                                                                                 | 2         |
| Food record . . . . .                                                                                           | 2         |
| Proportion of retinoids in vitamin A intake . . . . .                                                           | 3         |
| Supplement 2: Extraction protocols for untargeted metabolomics . . . . .                                        | 4         |
| Supplement 3: Extended description of statistical methods . . . . .                                             | 5         |
| Biomarkers for vitamin A status . . . . .                                                                       | 5         |
| Permutation tests for assessing statistical significance . . . . .                                              | 5         |
| Supplement 3c: GSEA-based pathway analysis . . . . .                                                            | 7         |
| Supplement 4: Links to R code used in analysis . . . . .                                                        | 9         |
| <b>Appendix Figures</b>                                                                                         | <b>10</b> |
| Appendix Figure S1: Participant flow chart . . . . .                                                            | 10        |
| Appendix Figure S2: Free fatty acids and molecules with one fatty acid in untargeted metabolomics . . . . .     | 11        |
| Appendix Figure S3: Phospholipids in untargeted metabolomics . . . . .                                          | 12        |
| Appendix Figure S4: Different triglyceride molecules in untargeted metabolomics . . . . .                       | 13        |
| Appendix Figure S5: Sphingolipids in untargeted metabolomics . . . . .                                          | 14        |
| Appendix Figure S6: Correlation between different fatty acid carrying molecules and serum cholesterol . . . . . | 15        |
| <b>Appendix Tables</b>                                                                                          | <b>16</b> |
| Appendix Table S1: List of measured targeted metabolites . . . . .                                              | 16        |
| Appendix Table S2: Pathway analysis results . . . . .                                                           | 17        |
| Appendix Table S3: Serum bile acid level sums . . . . .                                                         | 19        |
| Appendix Table S4: Amino acids and fatty acids in untargeted metabolome . . . . .                               | 20        |
| Appendix Table S5: Correlation of essential amino acids with MUAC and transthyretin . . . . .                   | 21        |
| Appendix Table S6: List of metabolites recognized by untargeted metabolomics . . . . .                          | 22        |
| Appendix Table S7: Nutrient intakes in proportion to energy intake . . . . .                                    | 58        |
| Appendix Table S8: Exact p-values of Figure 4 . . . . .                                                         | 59        |
| <b>References</b>                                                                                               | <b>60</b> |

## Appendix Supplementary Methods

### Supplement 1: Analysis of dietary data

#### *Online questionnaires*

We emailed the parents links to four short online questionnaires inquiring background information of the parents and the participating child as well as the food consumption of the responding parent(s) and the participating child. These included questions on the type of fat and salt usually used in cooking and whether salt is usually added when boiling porridge, rice, pasta and potatoes. A question whether the child has been given dietary supplements during the past month, and if yes, what is the product name, dosage and frequency of use, was also included. Information on the nutrient values of dietary supplements was gathered into an Excel table from producers' internet pages and package labels.

#### *Food record*

We sent a four-day food record to parents of each participant and assigned the dates (three weekdays and one day on the weekend) for filling in the record. The instruction page of the food records advised parents to record all foods and beverages that their child consumed during the recording days, except for what they consumed at preschool. An example page was also included. We provided the families with a validated[S1] Children's Food Picture Book[S2], designed to assist in portion size estimation. The parents were instructed to list all the ingredients of composite dishes and to estimate portion sizes using the picture book, weighing, household measures such as teaspoons or tablespoons, or package labels. For packed food products, the exact brand and product name was required.

We gave the day care personnel a separate pre-coded food record for recording food consumption at the day care centre on the dates matching the home food record. We instructed the personnel orally, and the food record included written instructions. Breakfast, lunch, afternoon snack and possible additional snacks each had predefined sections. Different food groups, such as main courses, side dishes (potatoes, pasta, rice), and salad at lunch each had predetermined rows. We also gave the personnel the Children's Food Picture Book and they could also estimate the amounts in household measures.

The food data were recorded using AivoDiet dietary software, which included the Fineli Food Composition Database Release 16 (2013) of the National Institute for Health and Welfare. We had previously updated this as described elsewhere[S3]. We also added new food items, especially vegan products, to the database when necessary. We entered the nutrient values of fortified food products as per information on package labels. The database includes recipes for typical Finnish mixed dishes. For each individual meal, the research assistant used a suitable recipe from the database, modified an existing recipe, or created a new recipe according to the parents' reports. The salt content of home dishes was based on the recipes in the database and we also made use of the information on the type of fat and the type and use of salt in the household gained from the online questionnaires. For food eaten at day care, we used recipes provided by the city of Helsinki's early childhood education and care food services. The food services also provided information on the products (e.g. milk, non-dairy milk substitutes, bread, fat spread, yoghurts) used at each day care centre.

After data entry, we checked for outlying values of food consumption in grams and outlying energy and nutrient intakes. After extracting the data from the software, each food code (food item or mixed dish) appearing in the data set was assigned to a food group and nutrient retention factors[S4] were applied using a single factor per nutrient per food group. The food records were kept between May and October 2017. Two omnivores and three vegetarians had missing or incomplete recordings for one to three days and we omitted these days from the analysis. We included all four days of data in the analysis for the rest of the participants. To calculate total intake from food and supplements, we combined the intake data from dietary supplements with the food record data in R.

*Proportion of retinoids in vitamin A intake*

Values for retinol and carotenoids were not available in our food composition database and thus the intake of different forms of vitamin A could not be directly calculated. Therefore, we calculated the proportion of retinoids in vitamin A manually by disaggregating the food consumption data into ingredients, multiplying the weight of each food containing retinoid naturally or by fortification with its retinoid content per gram. To find the retinoid values, we used product details available online and food composition databases. The proportion of retinoids in the total RAE intake was calculated as follows:

$$\text{retinoid-\%} = \frac{\sum \text{retinoids in uncooked ingredients } (\mu\text{g}) \text{ for the diet group}}{\sum \text{RAE in uncooked ingredients } (\mu\text{g}) \text{ for the diet group}} * 100\%$$

**Supplement 2: Extraction protocols for untargeted metabolomics**

The following protocol was used for extraction of metabolome and lipidome for untargeted metabolomics: Frozen serum samples were thawed on ice, 20ml of serum was mixed to a microtube with 180ml 80% methanol for metabolomics or 10ml of serum with 190ml 100% isopropanol for lipidomics. Solutions were vortexed for 15 seconds, incubated at 4°C for 1 hour and centrifuged at 14000g for 15 minutes to achieve supernatant that was transferred to another microtube and frozen to -20°C until analysis.

### Supplement 3: Extended description of statistical methods

#### *Biomarkers for vitamin A status*

We used two approaches for measuring vitamin A status in the participants.

Retinol-binding protein (RBP) has been used as a biomarker for vitamin A deficiency in large epidemiological studies. We used similar equipment and limits for insufficiency ( $<1.17\text{mmol/l}$ ) and deficiency ( $<0.83\text{mmol/l}$ ) as Engle-Stone et al.[S5] who reported sensitivity and specificity of 94.7% and 88.9% for RBP in predicting vitamin A deficiency in children.

In addition, we used a regression model of RBP, transthyretin and CRP described by Talsma et al.[S6] for vitamin A status assessment. For convenience, we made slight adjustments to the model that do not affect its specificity and sensitivity (Talsma et al. reported AUC of 0.98): We adjusted the constant of the model by -0.496 so that the decision limit of the model was 0 instead of the original 0.496. We also multiplied the estimated regression coefficient by -1 so that the deficiency was denoted by a negative value of the model instead of a positive value.

#### *Permutation tests for assessing statistical significance*

In our study, several aspects contradict the use of Student's t-test. We had a relatively small sample size, making it impossible to evaluate predict if the concentration of each measured metabolite is normally distributed in reference population. Furthermore, some measurements include multiple outlier suspects. With small sample size it is problematic to exclude these values from analyses as there is no credible reason to believe the outliers would result from measurement-related rather than physiological reasons. However, these outliers have a strong effect on estimates of variance with small sample size. This decreases the power of e.g. Student's t-test. In addition, there may be age- and sex-dependent variance in physiological concentrations of different metabolites, particularly in children. This effect should be considered while conducting statistical tests.

Therefore, we tailored a following age- and sex-adjusted non-parametric permutation test for our study, which is robust against outliers and does not rely on the unverifiable assumption of normality or equivariance. Recently, the use of such tests and probability index models have become more popular[S7,S8]

**Stratification and the measure of difference** Let us assume two datasets,  $X$  and  $Y$ , representing observed concentrations of a metabolite in two groups, say omnivore and vegan groups. Sample sizes may be unequal. For each data point, we have an ID label, age and sex of the corresponding participant and measured metabolite concentration.

Age and sex information is used in *stratification* (dividing the participants to age- and sex-standardized groups). With small sample size we encounter a risk of empty age-sex strata. Thus, it is necessary to divide strata by age somewhat sparsely. In our study, as there was only 6 vegans, we were forced to use only two age classes: (1) under 4-year-olds and (2) at least 4-year-olds. This yields four strata.

To avoid unnecessary outlier removal, we will use a non-parametric *probability index* as a measure of difference between these datasets. Probability index  $P(X_i > Y_j)$  is defined as the probability that randomly selected individual values from each dataset,  $X_i$  and  $Y_j$ , satisfy the inequality  $X_i > Y_j$ . With a small sample size and decent computing power it is possible to compute these inequalities, a *brute force* method of checking this inequality over all possible datapairs of observations ( $n_X \cdot n_X$  operations) in the sample is eligible.

**Forming null distribution by permutation** First, we estimate a statistical null distribution of the probability index based on our data.[S9] For  $k$  rounds:

1. Step 1: Randomly permute the group ID labels *inside* each stratum. This basically divides the participants randomly to two groups in an age- and sex-standardized manner while also maintaining the group sizes.
2. Step 2: Calculate  $P(X_i > Y_j)$  with the permuted group labels and calculate quadratic deviation from the null  $P(X_i > Y_j) = 0.5$  to be the test statistic. Save test statistics to a vector  $T = (T_1, T_2, \dots, T_k)$  that will eventually form the null distribution.

In our simulations, we used  $k = 47500$ <sup>1</sup> that took approximately 330 seconds to run with the datasets of 24 controls and 6 vegans and 6-year-old 1.90GHz processor.

**Statistical test** To use proper two-sided statistical test, we will use a squared test statistic. As probability index  $P(X_i > Y_j) \in [0, 1]$  and comparing two identical datasets yields  $P(X_i > Y_j) = 0.5$ , we used a test statistic

$$T = (P(X_i > Y_j) - 0.5)^2.$$

After forming the null distribution or probability indexes, we transform it to test statistics and compare the test statistic from the original data,  $t_{real}$ , to the null distribution to achieve approximated p-value:

$$p \approx P(t_{real} > T).$$

Finally, the value of the test statistic from the original data (with the real group labels),  $t_{real}$  is used with its the null distribution. After forming the null distribution or probability indexes, we transform it to test statistics and compare the test statistic from the original data,  $t_{real}$ , to the null distribution to estimate the approximated p-value:

$$\hat{p} \approx \hat{P}(T > t_{real} > T) = \frac{\sum_{t \in T} [T > t_{real}]}{k}.$$

---

<sup>1</sup>The null distribution is generated randomly every time the test is run. Thus, p-value will be a random variable. Choosing high  $k$  will yield more accurate null distribution (smaller variance of p-value) while requiring more computing power or time. We selected  $k$  by requiring a standard error of 0.001 at the significance level ( $\alpha = 0.05$ ). Standard error of a p-value in a permutation test is  $\sqrt{\frac{p(1-p)}{k}}$  (see e.g. Efron & Tibshirani, *An Introduction to the Bootstrap*, Chapman & Hall, 1993). From this, we have a  $k = \frac{0.05 * 0.95}{0.001^2} = 47500$ .

*Supplement 3c: GSEA-based pathway analysis*

Gene-Set Enrichment Analysis (GSEA) was originally introduced by Subramanian et al.[S10] for obtaining pathway-level knowledge from complex gene expression datasets. We used a GSEA-based approach with HMDB 3.0 pathway database as a framework for metabolome-level pathway analysis. The algorithm was carried out in R and the principles are discussed in the following.

**Data preprocessing and statistical significance of metabolite-level change** Original data from untargeted metabolomics can be seen in Table S3. For each ion found, there are usually multiple alternative metabolites that correspond to same mass per charge -ratio, thus indistinguishable by mass spectrometer. In total, our data had 10155 alternative metabolites contributing to data signal. We matched each of these metabolite ID's to HMDB 3.0 pathway database to discover the amount of metabolites for each pathway that was recognized at all in our data. Metabolites in one pathway have very similar mass per charge -ratios as many modifications include deleting or adding single ions. This poses an obvious problem of metabolites of a certain pathway appearing under the same mass per charge -peak in mass spectrometry. To avoid over-estimation of amount of "found metabolites", we allowed counting each ion for each pathway only once. For example, out of 49 metabolites in bile acid biosynthesis pathway, total of 23 metabolites were found in the list of alternative metabolites. 10 of these were not included in assessing statistical significance, as they appeared under the same mass per charge -peak as others, yielding 13 found metabolites. However, these 10 discarded metabolites may contribute to statistical significance of another pathway, assuming they were the only metabolite with same mass per charge in that particular pathway. List of pathways in the database and corresponding data can be seen in Table S2.

These found metabolites were further divided to significantly changed metabolites. Significance criteria in our pathway analysis was that fold change for the metabolite had to be  $> 0.25$  and uncorrected p-value had to be  $< 0.05$ . As the goal of pathway analysis is to recognize changes that correlate in one pathway, it is not necessary to use as tight significance levels as when analyzing single metabolites. Currently, there is no golden standard for pathway analysis significance levels, partly because there is no golden standard for pathway analysis method altogether.

**Statistical significance of pathway-level change with Fisher's exact test** We analyzed each pathway separately for positive changes, negative changes and all changes regardless of direction. In contrast to GSEA, we did not use permutation tests based on Enrichment Score for assessing pathway-level statistical significance. To save computation time, we preferred Fisher's exact test with null hypothesis that the proportion of significant changes to certain direction in a set of found metabolites in pathway  $i$ , is equal to the proportion of significantly changed ions to that direction in the set of all found ions<sup>2</sup>:

$$H_0 : \frac{n_{i,sig.}}{n_i} = \frac{n_{ions,sig.}}{n_{ions}}$$
$$H_1 : \frac{n_{i,sig.}}{n_i} \neq \frac{n_{ions,sig.}}{n_{ions}}$$

P-values from Fisher's exact test were corrected for multiple hypothesis testing with Benjamini-Hochberg method.

**GSEA-based Enrichment Score as a measure of pathway impact** Enrichment Score (ES) describes how well changes in metabolite levels of a certain pathway correlate with each other. If a pathway has multiple significant changes to same direction, this pathway will have high ES. If significant changes are randomly scattered in terms of direction and magnitude, the pathway will have low ES. Thus, ES is affected by (1) the magnitude and (2) amount of changes in metabolite levels of a pathway as well as (3) consistency

---

<sup>2</sup>Comparison is with all found ions because each ion is allowed to be counted only once per pathway

of changes. We calculated ES for each pathway as described by Subramanian et al.[S10] with the exception that we used fold change instead of correlation to sort metabolites according to their magnitude of change. In addition, only the significant changes, i.e. the changes satisfying the conditions defined above, were counted for the Enrichment Score cumulative function.

Disadvantages of using Enrichment Score as a measure of pathway impact include overestimating the impact on pathways with high amount of metabolites.



**Supplement 4: Links to R code used in analysis**

All R codes used in statistical analysis and building figures for this article are open access in GitHub:

`https://github.com/topihovinen/mirahelsinki`

As the small sample size could risk the anonymity of our participants, we chose not to publish the raw data file online.

**Appendix Figures**

**Appendix Figure S1: Participant flow chart**

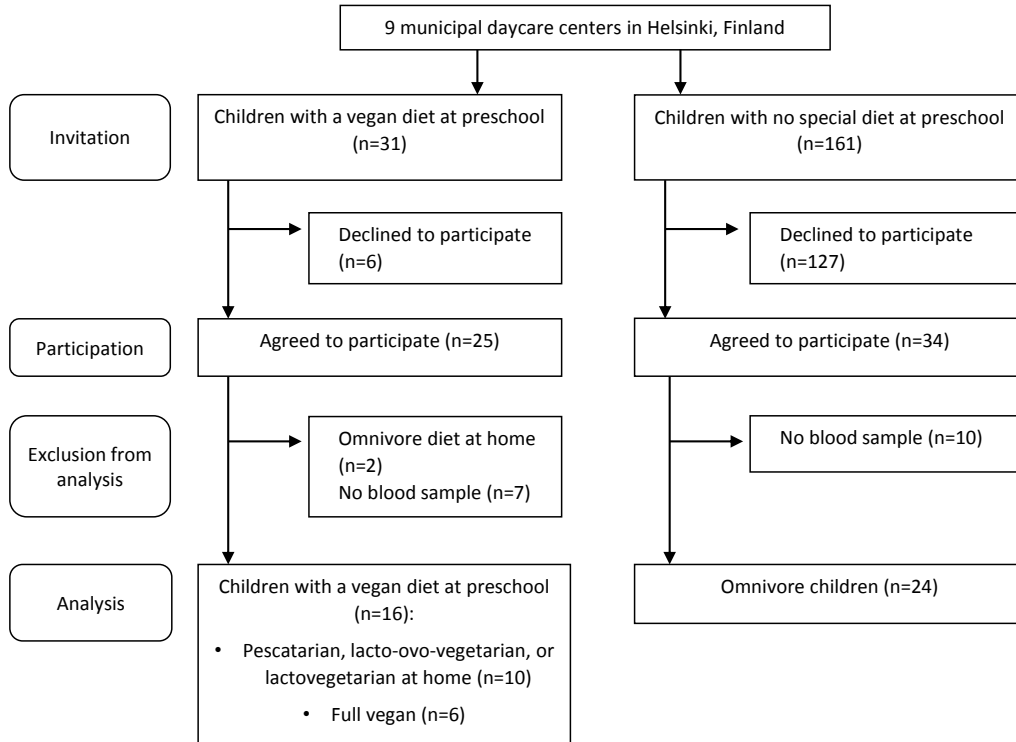

Figure S1: Participant flow chart

Appendix Figure S2: Free fatty acids and molecules with one fatty acid in untargeted metabolomics

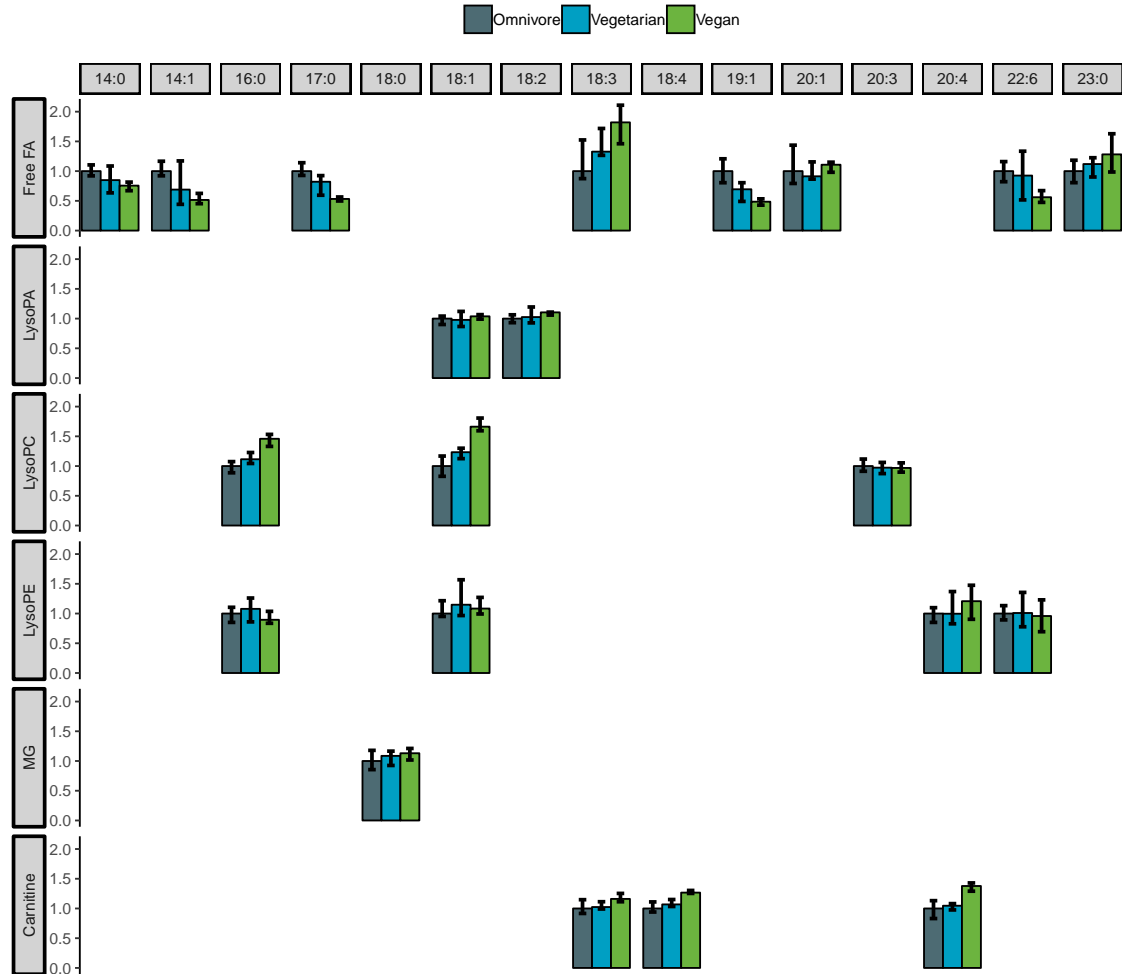

Figure S2: Molecules including a single fatty acid detected by untargeted metabolomics. The figure is grouped by fatty acid length and molecule type. Notation of fatty acid is "number of carbon atoms : number of double bonds". Each bar represents group median and error bar is interquartile range. FA = fatty acid, LysoPA = lysophosphatidic acid, LysoPC = lysophosphatidylcholine, LysoPE = lysophosphatidylethanolamine, MG = monoglyceride.

**Appendix Figure S3: Phospholipids in untargeted metabolomics**

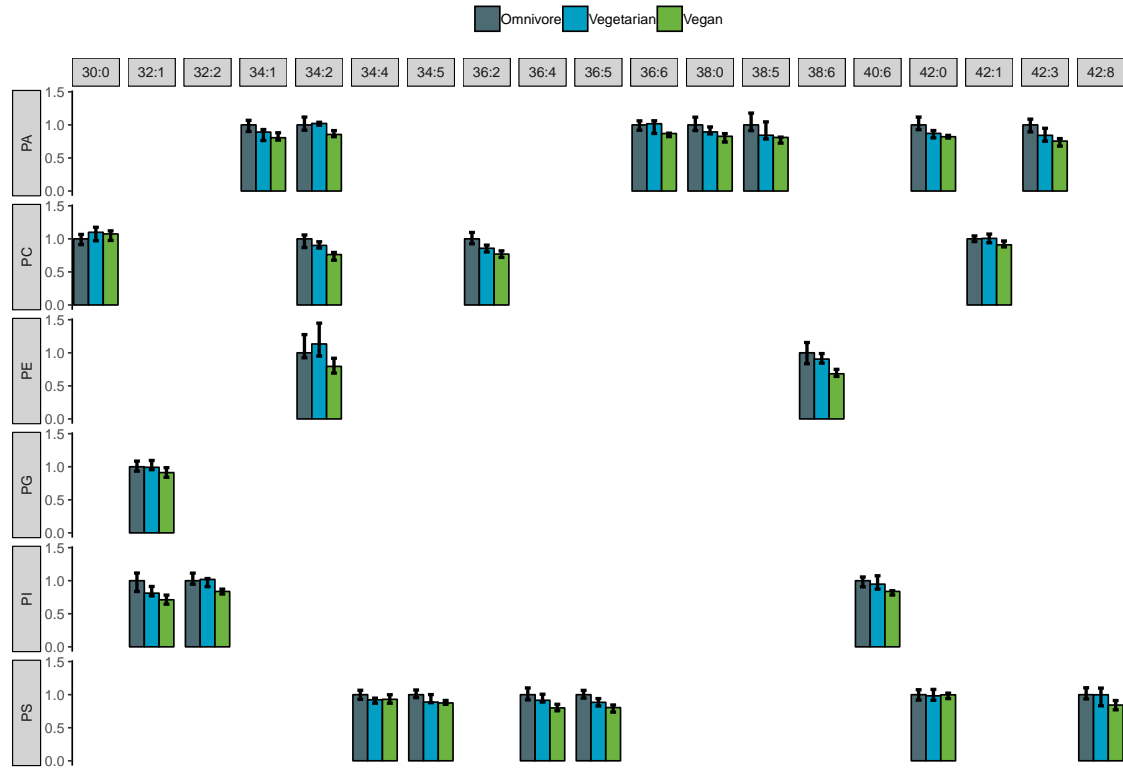

Figure S3: Phospholipids detected by untargeted metabolomics. Phospholipids include two fatty acid tails, and the figure is grouped by sum of fatty acid length/double bonds, and phospholipid type. Notation of fatty acid is "sum of carbon atoms in the two fatty acids : sum of double bonds in the two fatty acids". Each bar represents group median and error bar is interquartile range. Note that almost all detected phospholipids are found in smaller amounts in vegan serum than in omnivores and vegetarians. However, this is most probably related to most serum phospholipids being located in lipoprotein particles, and thus correlating well with low cholesterol in vegans (see figure S6). PA = phosphatidic acid, PC = phosphatidylcholine, PE = phosphatidylethanolamine, PG = phosphatidylglycerol, PI = phosphatidylinositol, PS = phosphatidylserine.

**Appendix Figure S4: Different triglyceride molecules in untargeted metabolomics**

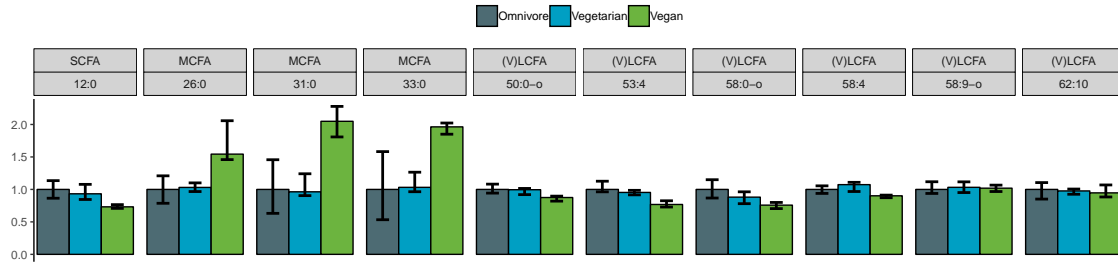

Figure S4: Triglycerides detected by untargeted metabolomics. The figure is grouped by fatty acid length and molecule type. Notation of fatty acid is "sum of carbon atoms in the two fatty acids : sum of double bonds in the two fatty acids". Each bar represents group median and error bar is interquartile range. MCFA = medium-chain fatty acid (the triglyceride includes most probably three fatty acids with carbon atoms between 8-13 in each), SCFA = short-chain fatty acid (the triglyceride includes most probably three fatty acids with carbon atoms between 3-7 in each), (V)LCFA = (very) long-chain fatty acid (the triglyceride includes most probably three fatty acids with at least 14 carbon atoms in each).

**Appendix Figure S5: Sphingolipids in untargeted metabolomics**

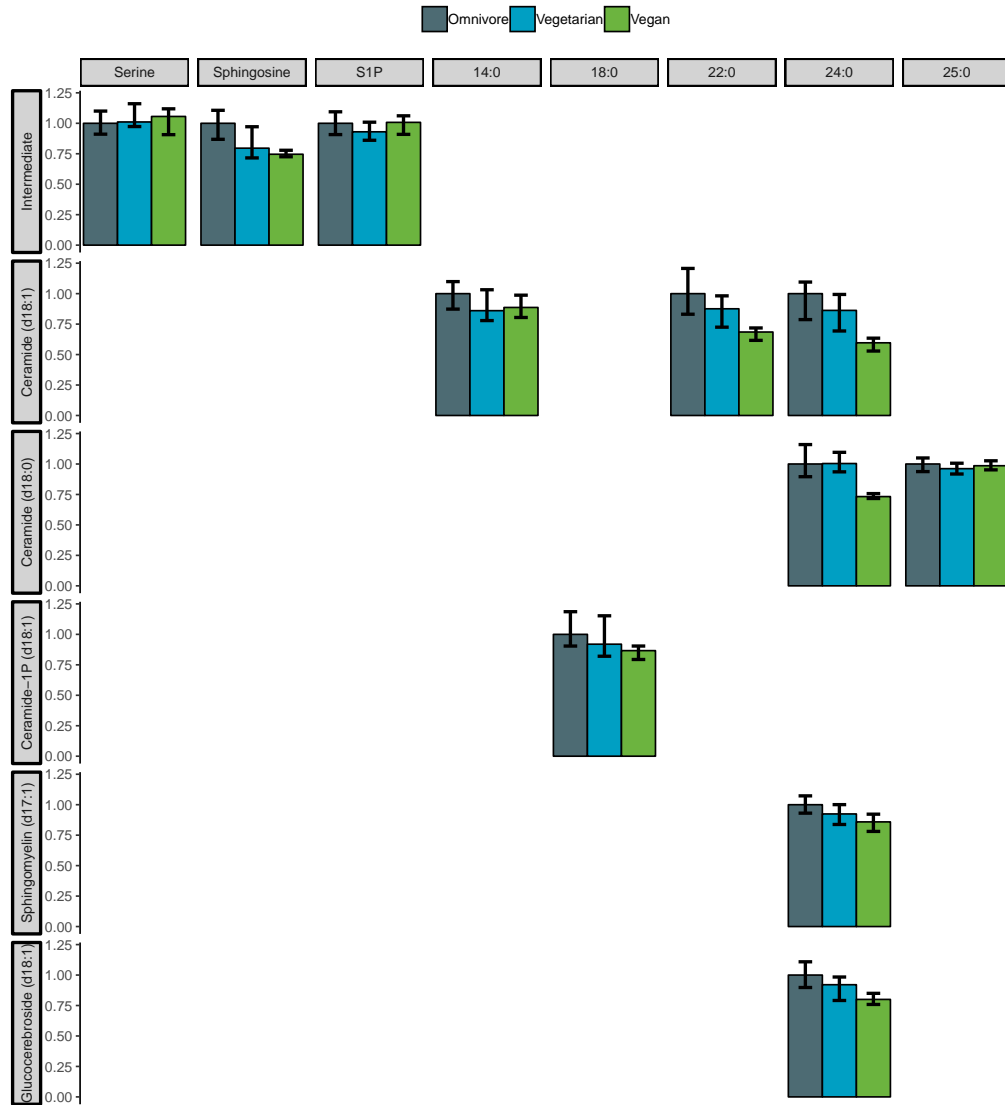

Figure S5: Sphingolipids and their metabolites detected by untargeted metabolomics. The figure is grouped by fatty acid length and molecule type. Notation of fatty acid is "number of carbon atoms : number of double bonds". Each bar represents group median and error bar is interquartile range. S1P = sphingosine-1-phosphate.

**Appendix Figure S6: Correlation between different fatty acid carrying molecules and serum cholesterol**

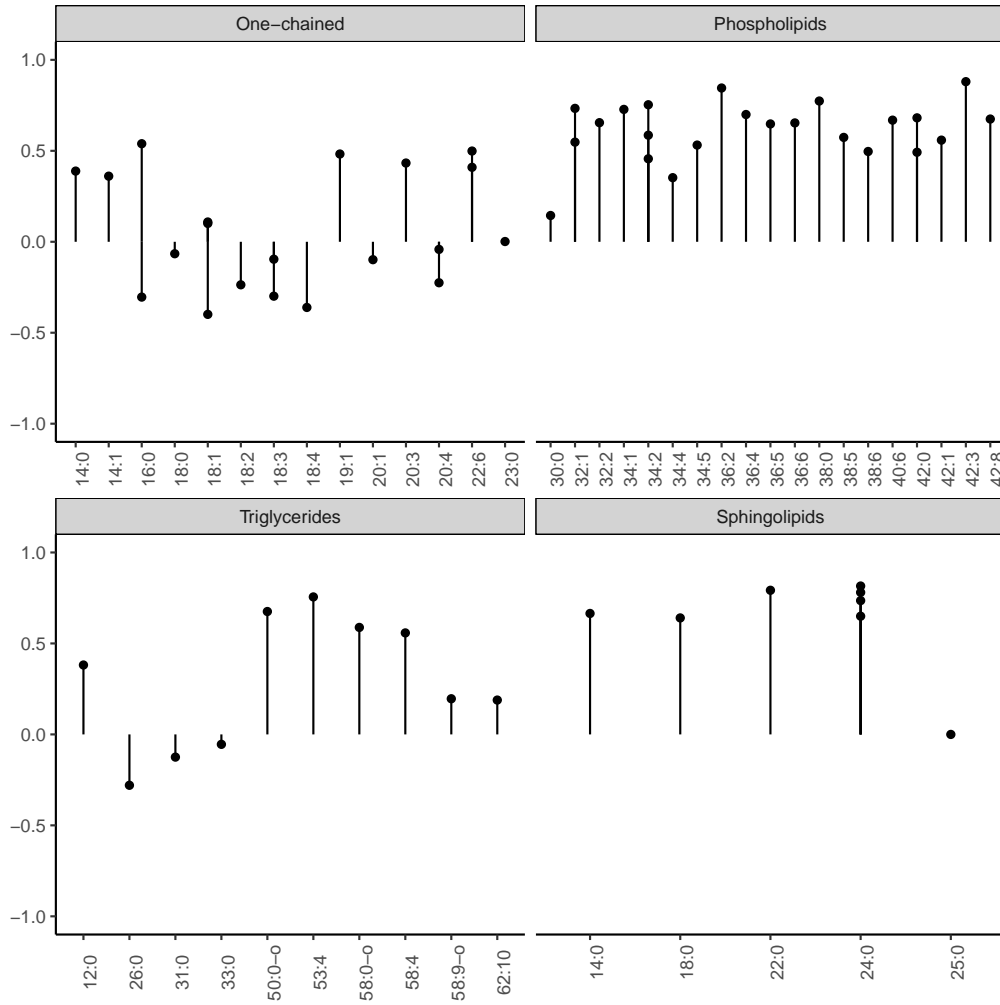

Figure S6: Correlation between cholesterol and detected molecules with one, two or three fatty acids. Nearly all phospholipids, spingolipids and (V)LCFA triglycerides show great correlation with serum cholesterol, while MCFA triglycerides and most lysophospholipids and free fatty acids ("one-chained" fatty acid molecules) vary more independently. Notation of fatty acid is "sum of carbon atoms in the two fatty acids : sum of double bonds in the two fatty acids". Some lollipop bars show multiple candy due to e.g. one lysophospholipid and one free fatty acid were detected with identical fatty acid type.

**Appendix Tables**

**Appendix Table S1: List of measured targeted metabolites**

| Metabolite                                       | Sample       | Method     | CTR*          | Ref         |
|--------------------------------------------------|--------------|------------|---------------|-------------|
| 7-alpha-hydroxy-4-cholesten-3-one                | Serum        | HPLC-MS/MS | -             | [S11]       |
| Alpha 1-acid glycoprotein (AGP)                  | Serum        | ELISA      | -             | [S12]       |
| Avenasterol                                      | Serum        | GLC        | -             | [S13,S14]   |
| Campesterol                                      | Serum        | GLC        | -             | [S13,S14]   |
| Chenodeoxycholic acid                            | Serum        | HPLC-MS/MS | -             | [S11]       |
| Cholestanol                                      | Serum        | GLC        | -             | [S13,S14]   |
| Cholestenol                                      | Serum        | GLC        | -             | [S14]       |
| Cholesterol, total                               | Plasma       | -          | ≤ 5.0 mmol/l  | [S12], 4515 |
| Cholesterol, HDL                                 | Plasma       | -          | -             | [S12], 4516 |
| Cholesterol, LDL                                 | Plasma       | -          | ≤ 3.0 mmol/l  | [S12], 4599 |
| Cholic acid                                      | Serum        | HPLC-MS/MS | -             | [S11]       |
| C-reactive protein (CRP)                         | Serum        | ELISA      | ≤ 5 mg/l      | [S12]       |
| Creatinine                                       | Urine        | -          | -             | [S12], 2145 |
| Deoxycholic acid                                 | Serum        | HPLC-MS/MS | -             | [S11]       |
| Desmosterol                                      | Serum        | GLC        | -             | [S14]       |
| Erythrocytes (Red blood cells)                   | Whole blood  | -          | -             | [S12], 2475 |
| Ferritin                                         | Serum        | ELISA      | ≥ 15 ug/l     | [S12]       |
| Glucose (fasting)                                | Plasma       | -          | -             | [S12], 1468 |
| Glycochenodeoxycholic acid                       | Serum        | HPLC-MS/MS | -             | [S11]       |
| Glycocholic acid                                 | Serum        | HPLC-MS/MS | -             | [S11]       |
| Glycodeoxycholic acid                            | Serum        | HPLC-MS/MS | -             | [S11]       |
| Glycolithocholic acid                            | Serum        | HPLC-MS/MS | -             | [S11]       |
| Glycoursodeoxycholic acid                        | Serum        | HPLC-MS/MS | -             | [S11]       |
| Hematocrit                                       | Whole blood  | -          | -             | [S12], 2475 |
| Hemoglobin                                       | Whole blood  | -          | ≥ 112 mg/l    | [S12], 2475 |
| Hyodeoxycholic acid                              | Serum        | HPLC-MS/MS | -             | [S11]       |
| Iodine                                           | Urine        | IPC-MS     | -             | [S17], 1984 |
| Lathosterol                                      | Serum        | GLC        | -             | [S14]       |
| Leukocytes (white blood cells)                   | Whole blood  | -          | -             | [S16], 2475 |
| Lithocholic acid                                 | Serum        | HPLC-MS/MS | -             | [S11]       |
| Mean corpuscular hemoglobin (MCH)                | Whole blood  | -          | -             | [S12], 2475 |
| Mean corpuscular hemoglobin concentration (MCHC) | Whole blood  | -          | -             | [S16], 2475 |
| Mean corpuscular volume (MCV)                    | Whole blood  | -          | -             | [S16], 2475 |
| Retinol-Binding Protein (RBP)                    | Serum        | ELISA      | ≥ 1.17 umol/l | [S12]       |
| Red blood cell Distribution Width (RDW)          | Whole blood  | -          | -             | [S16], 2475 |
| Sitosterol                                       | Serum        | GLC        | -             | [S13,S14]   |
| Squalene                                         | Serum        | GLC        | -             | [S14]       |
| Taurochenodeoxycholic acid                       | Serum        | HPLC-MS/MS | -             | [S11]       |
| Taurocholic acid                                 | Serum        | HPLC-MS/MS | -             | [S11]       |
| Taurodeoxycholic acid                            | Serum        | HPLC-MS/MS | -             | [S11]       |
| Tauroolithocholic acid                           | Serum        | HPLC-MS/MS | -             | [S11]       |
| Tauroursodeoxycholic acid                        | Serum        | HPLC-MS/MS | -             | [S11]       |
| Transferrin Receptor (TfR)                       | Serum        | ELISA      | ≥ 8.3 mg/l    | [S12]       |
| Transthyretin                                    | Serum        | -          | -             | [S16], 2494 |
| Trombocytes                                      | Whole Blood  | -          | -             | [S16], 2475 |
| Triglycerides                                    | Plasma       | -          | -             | [S16], 4568 |
| Ursodeoxycholic acid                             | Serum        | HPLC-MS/MS | -             | [S11]       |
| Vitamin B9 (folate)                              | Erythrocytes | ICMA       | -             | [S16], 1414 |
| Vitamin B12 (bound to TC2)                       | Serum        | ICMA       | ≥ 70 pmol/l   | [S16], 1142 |
| Vitamin D2-25-OH                                 | Serum        | HPLC       | -             | [S16], 9476 |
| Vitamin D3-25-OH                                 | Serum        | HPLC       | ≥ 50 nmol/l   | [S16], 9476 |
| Zinc                                             | Serum        | AAS        | -             | [S16], 2639 |

\*CTR = Clinical target range for children, if assessed, based on the laboratory handbook of the method.  
Age-adjusted reference range can be found from reference of each method



**Appendix Table S2: Pathway analysis results**

Appendix Table S2: Results of the pathway analysis showing a list of pathways included in the analysis, total amount of metabolites in each pathway, amount of found metabolites by the untargeted metabolomics method and significant changes to positive (concentration in vegans > concentration in omnivores) or negative direction with corresponding p-values and Enrichment Score (defined in Supplement 3c).

| Pathway name                                                       | Metabolites |       | Sig. changes* |      | p-value** |        |        | Enrichment Score |
|--------------------------------------------------------------------|-------------|-------|---------------|------|-----------|--------|--------|------------------|
|                                                                    | Total       | Found | Pos.          | Neg. | Pos.      | Neg.   | Any    |                  |
| Alanine Metabolism                                                 | 7           | 5     | 1             | 0    | 0.56      | 1.00   | 0.78   | 0.2596           |
| Alpha Linolenic Acid and Linoleic Acid Metabolism                  | 17          | 5     | 2             | 1    | 0.17      | 0.45   | 0.12   | 0.8576           |
| Amino Sugar Metabolism                                             | 29          | 8     | 0             | 1    | 1.00      | 0.62   | 0.91   | 0.2778           |
| Ammonia Recycling                                                  | 24          | 10    | 1             | 1    | 0.81      | 0.70   | 0.78   | 0.1697           |
| Androgen and Estrogen Metabolism                                   | 17          | 2     | 0             | 0    | 1.00      | 1.00   | 1.00   | 0.3735           |
| Arachidonic Acid Metabolism                                        | 59          | 4     | 1             | 0    | 0.48      | 1.00   | 0.71   | 0.4927           |
| Arginine and Proline Metabolism                                    | 26          | 10    | 2             | 1    | 0.46      | 0.70   | 0.52   | 0.6791           |
| Aspartate Metabolism                                               | 12          | 5     | 0             | 1    | 1.00      | 0.45   | 0.78   | 0.2064           |
| Beta Oxidation of Very Long Chain Fatty Acids                      | 14          | 4     | 0             | 2    | 1.00      | 0.067  | 0.29   | 1.6513           |
| Beta-Alanine Metabolism                                            | 13          | 6     | 0             | 1    | 1.00      | 0.51   | 0.84   | 0.3931           |
| Betaine Metabolism                                                 | 10          | 3     | 0             | 1    | 1.00      | 0.30   | 0.60   | 0.3495           |
| Bile Acid Biosynthesis                                             | 49          | 13    | 7             | 1    | 0.0015    | 0.79   | 0.0085 | 3.0464           |
| Biotin Metabolism                                                  | 4           | 2     | 0             | 0    | 1.00      | 1.00   | 1.00   | 0.3194           |
| Butyrate Metabolism                                                | 9           | 1     | 0             | 0    | 1.00      | 1.00   | 1.00   | 0.1451           |
| Caffeine Metabolism                                                | 12          | 2     | 0             | 1    | 1.00      | 0.21   | 0.46   | 0.6517           |
| Carnitine Synthesis                                                | 17          | 3     | 1             | 0    | 0.39      | 1.00   | 0.60   | 0.2555           |
| Catecholamine Biosynthesis                                         | 15          | 3     | 0             | 0    | 1.00      | 1.00   | 1.00   | 0.2036           |
| Citric Acid Cycle                                                  | 23          | 6     | 0             | 0    | 1.00      | 1.00   | 1.00   | 0.1766           |
| Cysteine Metabolism                                                | 8           | 3     | 0             | 0    | 1.00      | 1.00   | 1.00   | 0.0994           |
| D-Arginine and D-Ornithine Metabolism                              | 9           | 3     | 1             | 0    | 0.39      | 1.00   | 0.60   | 0.3181           |
| DNA Replication Fork                                               | 4           | 1     | 0             | 0    | 1.00      | 1.00   | 1.00   | 0.0471           |
| Degradation of Superoxides                                         | 5           | 0     | 0             | 0    | 1.00      | 1.00   | 1.00   | 0.0000           |
| Ethanol Degradation                                                | 15          | 2     | 0             | 1    | 1.00      | 0.21   | 0.46   | 0.2177           |
| Fatty Acid Biosynthesis                                            | 32          | 21    | 2             | 7    | 0.85      | 0.0073 | 0.079  | 4.5971           |
| Fatty Acid Elongation In Mitochondria                              | 26          | 1     | 0             | 0    | 1.00      | 1.00   | 1.00   | 0.0604           |
| Fatty acid Metabolism                                              | 29          | 1     | 0             | 0    | 1.00      | 1.00   | 1.00   | 0.1451           |
| Folate Metabolism                                                  | 22          | 2     | 0             | 0    | 1.00      | 1.00   | 1.00   | 0.0924           |
| Fructose and Mannose Degradation                                   | 18          | 2     | 0             | 0    | 1.00      | 1.00   | 1.00   | 0.1449           |
| Galactose Metabolism                                               | 25          | 4     | 0             | 0    | 1.00      | 1.00   | 1.00   | 0.1054           |
| Gluconeogenesis                                                    | 27          | 6     | 0             | 0    | 1.00      | 1.00   | 1.00   | 0.1456           |
| Glucose-Alanine Cycle                                              | 12          | 5     | 0             | 0    | 1.00      | 1.00   | 1.00   | 0.1342           |
| Glutamate Metabolism                                               | 18          | 5     | 0             | 0    | 1.00      | 1.00   | 1.00   | 0.1473           |
| Glutathione Metabolism                                             | 10          | 5     | 1             | 0    | 0.56      | 1.00   | 0.78   | 0.3815           |
| Glycerol Phosphate Shuttle                                         | 8           | 0     | 0             | 0    | 1.00      | 1.00   | 1.00   | 0.0000           |
| Glycerolipid Metabolism                                            | 19          | 4     | 0             | 0    | 1.00      | 1.00   | 1.00   | 0.1277           |
| Glycine and Serine Metabolism                                      | 51          | 18    | 2             | 2    | 0.78      | 0.62   | 0.74   | 0.4285           |
| Glycolysis                                                         | 21          | 3     | 0             | 0    | 1.00      | 1.00   | 1.00   | 0.0706           |
| Histidine Metabolism                                               | 24          | 7     | 0             | 1    | 1.00      | 0.57   | 0.89   | 1.3290           |
| Homocysteine Degradation                                           | 6           | 1     | 0             | 0    | 1.00      | 1.00   | 1.00   | 0.0132           |
| Inositol Metabolism                                                | 19          | 1     | 0             | 0    | 1.00      | 1.00   | 1.00   | 0.0270           |
| Inositol Phosphate Metabolism                                      | 20          | 2     | 0             | 0    | 1.00      | 1.00   | 1.00   | 0.0486           |
| Ketone Body Metabolism                                             | 10          | 3     | 0             | 2    | 1.00      | 0.036  | 0.17   | 1.0003           |
| Lactose Degradation                                                | 8           | 3     | 0             | 0    | 1.00      | 1.00   | 1.00   | 0.0711           |
| Lactose Synthesis                                                  | 11          | 3     | 0             | 0    | 1.00      | 1.00   | 1.00   | 0.0711           |
| Lysine Degradation                                                 | 13          | 6     | 1             | 0    | 0.63      | 1.00   | 0.84   | 0.3596           |
| Malate-Aspartate Shuttle                                           | 8           | 4     | 0             | 1    | 1.00      | 0.38   | 0.71   | 0.3121           |
| Methionine Metabolism                                              | 24          | 8     | 1             | 1    | 0.73      | 0.62   | 0.67   | 0.2746           |
| Mitochondrial Beta-Oxidation of Long Chain Saturated Fatty Acids   | 24          | 1     | 0             | 0    | 1.00      | 1.00   | 1.00   | 0.0471           |
| Mitochondrial Beta-Oxidation of Medium Chain Saturated Fatty Acids | 22          | 2     | 0             | 0    | 1.00      | 1.00   | 1.00   | 0.1133           |
| Mitochondrial Beta-Oxidation of Short Chain Saturated Fatty Acids  | 24          | 5     | 1             | 1    | 0.56      | 0.45   | 0.40   | 1.1089           |

Supplementary Appendix  
MIRA Study

| Pathway name                                | Metabolites |       | Sig. changes* |      | p-value** |        |       | Enrichment Score |
|---------------------------------------------|-------------|-------|---------------|------|-----------|--------|-------|------------------|
|                                             | Total       | Found | Pos.          | Neg. | Pos.      | Neg.   | Any   |                  |
| Mitochondrial Electron Transport Chain      | 15          | 2     | 0             | 0    | 1.00      | 1.00   | 1.00  | 0.1747           |
| Nicotinate and Nicotinamide Metabolism      | 13          | 1     | 0             | 0    | 1.00      | 1.00   | 1.00  | 0.2114           |
| Nucleotide Sugars Metabolism                | 9           | 1     | 0             | 0    | 1.00      | 1.00   | 1.00  | 0.0270           |
| Oxidation of Branched Chain Fatty Acids     | 14          | 0     | 0             | 0    | 1.00      | 1.00   | 1.00  | 0.0000           |
| Pantothenate and CoA Biosynthesis           | 10          | 2     | 0             | 0    | 1.00      | 1.00   | 1.00  | 0.0245           |
| Pentose Phosphate Pathway                   | 19          | 1     | 0             | 0    | 1.00      | 1.00   | 1.00  | 0.1295           |
| Phenylacetate Metabolism                    | 4           | 2     | 0             | 0    | 1.00      | 1.00   | 1.00  | 0.2400           |
| Phenylalanine and Tyrosine Metabolism       | 13          | 3     | 0             | 0    | 1.00      | 1.00   | 1.00  | 0.1272           |
| Phosphatidylinositol Phosphate Metabolism   | 11          | 2     | 0             | 0    | 1.00      | 1.00   | 1.00  | 0.0486           |
| Phospholipid Biosynthesis                   | 19          | 2     | 0             | 0    | 1.00      | 1.00   | 1.00  | 0.9672           |
| Phytanic Acid Peroxisomal Oxidation         | 15          | 2     | 0             | 0    | 1.00      | 1.00   | 1.00  | 0.0859           |
| Plasmalogen Synthesis                       | 22          | 2     | 0             | 0    | 1.00      | 1.00   | 1.00  | 1.1284           |
| Porphyrin Metabolism                        | 22          | 3     | 2             | 0    | 0.062     | 1.00   | 0.17  | 1.1454           |
| Propanoate Metabolism                       | 18          | 6     | 0             | 1    | 1.00      | 0.51   | 0.84  | 0.5561           |
| Pterine Biosynthesis                        | 25          | 0     | 0             | 0    | 1.00      | 1.00   | 1.00  | 0.0000           |
| Purine Metabolism                           | 45          | 8     | 0             | 1    | 1.00      | 0.62   | 0.91  | 0.4741           |
| Pyrimidine Metabolism                       | 36          | 8     | 0             | 0    | 1.00      | 1.00   | 1.00  | 0.5831           |
| Pyruvaldehyde Degradation                   | 7           | 4     | 0             | 0    | 1.00      | 1.00   | 1.00  | 0.1213           |
| Pyruvate Metabolism                         | 20          | 8     | 0             | 1    | 1.00      | 0.62   | 0.91  | 0.6152           |
| Retinol Metabolism                          | 18          | 2     | 0             | 0    | 1.00      | 1.00   | 1.00  | 0.0469           |
| Riboflavin Metabolism                       | 9           | 0     | 0             | 0    | 1.00      | 1.00   | 1.00  | 0.0000           |
| Selenoamino Acid Metabolism                 | 15          | 2     | 0             | 0    | 1.00      | 1.00   | 1.00  | 1.0958           |
| Spermidine and Spermine Biosynthesis        | 11          | 3     | 0             | 0    | 1.00      | 1.00   | 1.00  | 0.1704           |
| Sphingolipid Metabolism                     | 15          | 5     | 0             | 1    | 1.00      | 0.45   | 0.78  | 1.4865           |
| Starch and Sucrose Metabolism               | 14          | 2     | 0             | 0    | 1.00      | 1.00   | 1.00  | 0.0438           |
| Steroid Biosynthesis                        | 31          | 2     | 1             | 0    | 0.28      | 1.00   | 0.46  | 0.1854           |
| Steroidogenesis                             | 33          | 1     | 1             | 0    | 0.15      | 1.00   | 0.26  | 0.4889           |
| Sulfate/Sulfite Metabolism                  | 7           | 1     | 0             | 0    | 1.00      | 1.00   | 1.00  | 0.0471           |
| Taurine and Hypotaurine Metabolism          | 7           | 2     | 0             | 1    | 1.00      | 0.21   | 0.46  | 0.4234           |
| Thiamine Metabolism                         | 4           | 1     | 0             | 0    | 1.00      | 1.00   | 1.00  | 0.4144           |
| Threonine and 2-Oxobutanoate Degradation    | 15          | 2     | 0             | 0    | 1.00      | 1.00   | 1.00  | 0.0520           |
| Transcription/Translation                   | 28          | 19    | 1             | 3    | 0.95      | 0.37   | 0.78  | 0.8382           |
| Transfer of Acetyl Groups into Mitochondria | 16          | 5     | 0             | 0    | 1.00      | 1.00   | 1.00  | 0.1161           |
| Trehalose Degradation                       | 9           | 3     | 0             | 0    | 1.00      | 1.00   | 1.00  | 0.0711           |
| Tryptophan Metabolism                       | 34          | 6     | 0             | 0    | 1.00      | 1.00   | 1.00  | 0.5240           |
| Tyrosine Metabolism                         | 38          | 8     | 0             | 0    | 1.00      | 1.00   | 1.00  | 0.2912           |
| Ubiquinone Biosynthesis                     | 10          | 1     | 1             | 0    | 0.15      | 1.00   | 0.26  | 0.2332           |
| Urea Cycle                                  | 20          | 11    | 1             | 1    | 0.83      | 0.73   | 0.83  | 0.4941           |
| Valine, Leucine and Isoleucine degradation  | 37          | 6     | 0             | 4    | 1.00      | 0.0022 | 0.046 | 1.6367           |
| Vitamin B6 Metabolism                       | 10          | 2     | 1             | 1    | 0.28      | 0.21   | 0.070 | 1.2234           |
| Vitamin K Metabolism                        | 7           | 0     | 0             | 0    | 1.00      | 1.00   | 1.00  | 0.0000           |

\*Significant change means that there is a fold change of > 0.25 and an uncorrected p-value < 0.05

\*\*p-value is calculated based on Fisher exact test using the amount of significant changes compared to found metabolites

**Appendix Table S3: Serum bile acid level sums**

| Measurement                                                         | Omnivore (N = 24)        | Vegetarian (N = 10)       | Vegan (N = 6)            | p-value* |
|---------------------------------------------------------------------|--------------------------|---------------------------|--------------------------|----------|
| Total cholic acids— $\mu\text{mol/l}$                               | 0.149<br>[0.0242–2.26]   | 0.293<br>[0.075–2.02]     | 0.456<br>[0.185–1.87]    | 0.089    |
| Total chenodeoxycholic acids— $\mu\text{mol/l}$                     | 0.55<br>[0.158–6.18]     | 1.19<br>[0.0946–9.94]     | 1.63<br>[0.702–5.41]     | 0.089    |
| Primary bile acids— $\mu\text{mol/l}$                               | 0.75<br>[0.182–8.43]     | 1.58<br>[0.17–12]         | 2.08<br>[0.887–7.27]     | 0.098    |
| Primary bile acid balance (CDCA per CA)                             | 2.34<br>[0.553–13.4]     | 2.14<br>[0.505–12]        | 6.32<br>[1.82–8.2]       | 0.46     |
| Conjugated primary bile acids— $\mu\text{mol/l}$                    | 0.568<br>[0.156–7.89]    | 0.972<br>[0.15–11.1]      | 0.979<br>[0.432–7.04]    | 0.42     |
| Taurine-conjugated primary bile acids— $\mu\text{mol/l}$            | 0.0974<br>[0.0246–0.667] | 0.0779<br>[0.0142–0.945]  | 0.0637<br>[0.0135–0.316] | 0.72     |
| Glycine-conjugated primary bile acids— $\mu\text{mol/l}$            | 0.517<br>[0.107–7.22]    | 0.894<br>[0.122–10.7]     | 0.918<br>[0.39–6.72]     | 0.36     |
| Unconjugated primary bile acids— $\mu\text{mol/l}$                  | 0.15<br>[0.0266–0.646]   | 0.244<br>[0.0195–0.892]   | 0.498<br>[0.237–4.05]    | 0.047    |
| Primary bile acid conjugation ratio—% of all primary bile acids     | 0.835<br>[0.469–0.942]   | 0.883<br>[0.423–0.989]    | 0.569<br>[0.137–0.967]   | 0.31     |
| PBA conjugation balance (tauro- per glyco-)                         | 0.166<br>[0.0642–0.448]  | 0.0954<br>[0.0386–0.225]  | 0.0699<br>[0.0213–0.16]  | 0.047    |
| Total deoxycholic acids— $\mu\text{mol/l}$                          | 0.204<br>[0–1.25]        | 0.459<br>[0–2.14]         | 0.0243<br>[0–1.62]       | 0.52     |
| Total lithocholic acids— $\mu\text{mol/l}$                          | 0.0201<br>[0–0.0934]     | 0.0254<br>[0–0.0609]      | 0.00076<br>[0–0.0805]    | 0.36     |
| Total ursodeoxycholic acids— $\mu\text{mol/l}$                      | 0.14<br>[0.00628–4.61]   | 0.0881<br>[0.00765–0.648] | 0.312<br>[0.101–1.82]    | 0.36     |
| Secondary bile acids— $\mu\text{mol/l}$                             | 0.447<br>[0.0287–4.62]   | 0.652<br>[0.148–2.23]     | 0.778<br>[0.101–2.23]    | 0.57     |
| Conjugated secondary bile acids— $\mu\text{mol/l}$                  | 0.186<br>[0.0116–3.87]   | 0.29<br>[0.0698–1.91]     | 0.363<br>[0.0245–1.64]   | 0.72     |
| Taurine-conjugated secondary bile acids— $\mu\text{mol/l}$          | 0.0171<br>[0–0.124]      | 0.0253<br>[0–0.263]       | 0.0138<br>[0–0.0825]     | 0.79     |
| Glycine-conjugated secondary bile acids— $\mu\text{mol/l}$          | 0.17<br>[0.0116–3.77]    | 0.271<br>[0.0698–1.65]    | 0.323<br>[0.0245–1.56]   | 0.68     |
| Unconjugated secondary bile acids— $\mu\text{mol/l}$                | 0.191<br>[0.00245–0.839] | 0.269<br>[0.0783–0.454]   | 0.415<br>[0.0581–0.722]  | 0.60     |
| Secondary bile acid conjugation ratio—% of all secondary bile acids | 0.497<br>[0.167–0.973]   | 0.499<br>[0.214–0.871]    | 0.524<br>[0.242–0.736]   | 1.0      |
| SBA conjugation balance (tauro- per glyco-)                         | 0.132<br>[0–0.447]       | 0.126<br>[0–0.28]         | 0.0301<br>[0–0.175]      | 0.089    |
| Total bile acids— $\mu\text{mol/l}$                                 | 1.18<br>[0.394–13.1]     | 2.38<br>[0.796–12.3]      | 3.23<br>[1.01–9.62]      | 0.10     |
| Taurine-conjugated bile acids— $\mu\text{mol/l}$                    | 0.11<br>[0.0366–0.765]   | 0.103<br>[0.0142–1.07]    | 0.0775<br>[0.0135–0.398] | 0.68     |
| Glycine-conjugated bile acids— $\mu\text{mol/l}$                    | 0.674<br>[0.159–11]      | 1.24<br>[0.219–11]        | 1.5<br>[0.456–8.28]      | 0.36     |
| Bile acid conjugation balance (tauro- per glyco-)                   | 0.163<br>[0.0549–0.394]  | 0.108<br>[0.0381–0.249]   | 0.0517<br>[0.0205–0.163] | 0.047    |
| Bile acid conjugation ratio—% of all bile acids                     | 0.695<br>[0.266–0.944]   | 0.631<br>[0.366–0.956]    | 0.56<br>[0.14–0.913]     | 0.46     |
| Primary bile acids / secondary bile acids                           | 1.96<br>[0.375–17.9]     | 2.55<br>[0.294–36.9]      | 3.71<br>[0.846–46.4]     | 0.42     |

\*p-value is calculated for the comparison between omnivores and vegans using age- and sex-adjusted permutation test. All values shown as median [min–max].

**Appendix Table S4: Amino acids and fatty acids in untargeted metabolome**

| Metabolite                         | m/z         | Alternative metabolite identities                                                                                       | Difference of means<br>$m_{vegan} / m_{omnivore} - 1^*$ | Notes                                                  |
|------------------------------------|-------------|-------------------------------------------------------------------------------------------------------------------------|---------------------------------------------------------|--------------------------------------------------------|
| Glycine                            | 74-02498759 | HMDB00123, HMDB14691, HMDB31239                                                                                         | 0.256 ± 0.181                                           |                                                        |
| Alanine                            | 88-04039785 | HMDB00056, HMDB00161, HMDB00271, HMDB01310, HMDB31219                                                                   | 0.100 ± 0.142                                           |                                                        |
| Serine                             | 104-0353768 | HMDB00187, HMDB03406                                                                                                    | 0.018 ± 0.137                                           |                                                        |
| Proline                            | 114-0562031 | HMDB00162, HMDB03411, HMDB12880, HMDB30409, HMDB34208                                                                   | 0.134 ± 0.355                                           |                                                        |
| Valine                             | 116-0715802 | HMDB00043, HMDB00883, HMDB01382, HMDB02141, HMDB03355, HMDB13716, HMDB15550                                             | -0.221 ± 0.110                                          | Betaine is another major component under the same peak |
| Threonine                          | 118-0507756 | HMDB00167, HMDB00719, HMDB04041, HMDB61148                                                                              | -0.034 ± 0.169                                          |                                                        |
| Cysteine                           | 120-0116443 | HMDB00574, HMDB03417                                                                                                    | 0.018 ± 0.152                                           |                                                        |
| Leucine, Isoleucine                | 130-0871687 | HMDB00172, HMDB00557, HMDB00687, HMDB01645, HMDB01901, HMDB03640, HMDB13773, HMDB29168, HMDB33923, HMDB36382, HMDB60650 | -0.235 ± 0.121                                          |                                                        |
| Asparagine                         | 131-0459213 | HMDB00026, HMDB00168, HMDB11733, HMDB12265, HMDB33780                                                                   | -0.001 ± 0.162                                          |                                                        |
| Aspartate                          | 132-0298522 | HMDB00191, HMDB06483, HMDB11753                                                                                         | -0.174 ± 0.165                                          |                                                        |
| Glutamine                          | 145-061322  | HMDB00641, HMDB02031, HMDB03423, HMDB06899, HMDB28687                                                                   | 0.099 ± 0.219                                           |                                                        |
| Lysine                             | 145-0979856 | HMDB00182, HMDB03405, HMDB12114, HMDB12115                                                                              | -0.076 ± 0.202                                          |                                                        |
| Glutamate                          | 146-0456443 | HMDB00148, HMDB02393, HMDB02931, HMDB03011, HMDB03339, HMDB06556, HMDB33550, HMDB60475                                  | -0.091 ± 0.211                                          |                                                        |
| Methionine                         | 148-043429  | HMDB00696, HMDB14997, HMDB33951                                                                                         | 0.054 ± 0.239                                           |                                                        |
| Histidine                          | 154-0615445 | HMDB00177, HMDB34267                                                                                                    | -0.037 ± 0.091                                          |                                                        |
| Phenylalanine                      | 164-0711161 | HMDB00159, HMDB01007, HMDB04992, HMDB06044, HMDB33485, HMDB33589, HMDB34169, HMDB59934                                  | -0.118 ± 0.121                                          |                                                        |
| Arginine                           | 173-1037355 | HMDB00517, HMDB03416                                                                                                    | 0.283 ± 0.224                                           |                                                        |
| Tyrosine                           | 180-0657557 | HMDB00158, HMDB01119, HMDB02184, HMDB03831, HMDB06050, HMDB59720, HMDB60280                                             | 0.014 ± 0.102                                           |                                                        |
| Tryptophan                         | 203-0818546 | HMDB00929, HMDB13609, HMDB13840, HMDB14892, HMDB30396, HMDB60533, HMDB60878, HMDB60967                                  | -0.064 ± 0.124                                          |                                                        |
| Alpha-linolenic acid (ALA, FA18:3) | 277-2164727 | HMDB0001388, HMDB0003073, HMDB0030962, HMDB0030963, HMDB0030964, HMDB01388, HMDB03073, HMDB30962, HMDB30963, HMDB30964  | 0.458 ± 0.404                                           | Also gamma-linolenic acid is found under the same peak |
| Docosahexaenoic acid (DHA, FA22:6) | 327-2323316 | HMDB0002183, HMDB0030053, HMDB0030446, HMDB0035185, HMDB0038908, HMDB02183, HMDB30053, HMDB30446, HMDB35185, HMDB38908  | -0.475 ± 0.197                                          |                                                        |

\*Confidence interval length is calculated using Behrens-Fisher approach

**Appendix Table S5: Correlation of essential amino acids with MUAC and transthyretin**

| Essential amino acid | MUAC z-score |               | Transthyretin |               |
|----------------------|--------------|---------------|---------------|---------------|
|                      | Corr*        | p-value**     | Corr*         | p-value**     |
| Histidine            | 0.06         | 0.72          | -0.01         | 0.95          |
| (Iso)Leucine         | -0.16        | 0.33          | <b>0.38</b>   | <b>0.015</b>  |
| Lysine               | <b>-0.44</b> | <b>0.0048</b> | 0.21          | 0.20          |
| Methionine           | 0.06         | 0.72          | 0.01          | 0.95          |
| Phenylalanine        | -0.11        | 0.52          | -0.08         | 0.61          |
| Threonine            | -0.08        | 0.64          | 0.16          | 0.31          |
| Tryptophan           | 0.20         | 0.23          | 0.05          | 0.77          |
| Valine (and betaine) | -0.21        | 0.21          | <b>0.44</b>   | <b>0.0048</b> |

\*Pearson's correlation coefficient  
\*\*by t-test for Pearson's correlation coefficient, not adjusted for multiple comparisons

**Appendix Table S6: List of metabolites recognized by untargeted metabolomics**

| m/z         | HMDB ID alternatives                                                                                                                                                                                                                                                                                                                                    | Suggested annotation       | Comparison [vegan] - [omnivore] |             |                   |
|-------------|---------------------------------------------------------------------------------------------------------------------------------------------------------------------------------------------------------------------------------------------------------------------------------------------------------------------------------------------------------|----------------------------|---------------------------------|-------------|-------------------|
|             |                                                                                                                                                                                                                                                                                                                                                         |                            | Fold Change (log2)              | p-value     | p-value (BH adj.) |
| 57,03438372 | HMDB0001659, HMDB0003366, HMDB0031558, HMDB0031652, HMDB01659, HMDB03366, HMDB31558, HMDB31652                                                                                                                                                                                                                                                          | Acetone                    | -0,261970493                    | 0,041479977 | 0,164049886       |
| 59,01374188 | HMDB0000042, HMDB0003344, HMDB000042, HMDB02165, HMDB03344                                                                                                                                                                                                                                                                                              | Acetic acid                | -0,260207921                    | 0,19476729  | 0,435479683       |
| 67,0185461  | HMDB0006853, HMDB0013785, HMDB06853, HMDB06945, HMDB13785                                                                                                                                                                                                                                                                                               | Butynal                    | -0,191757331                    | 0,913285547 | 0,962980649       |
| 69,03480724 | HMDB0034233, HMDB0061873, HMDB0061874, HMDB34233, HMDB61873, HMDB61874                                                                                                                                                                                                                                                                                  | Butynol                    | -0,014075792                    | 0,060327892 | 0,202905172       |
| 71,01391932 | HMDB0001167, HMDB0006112, HMDB0031647, HMDB01167, HMDB06112, HMDB31647                                                                                                                                                                                                                                                                                  | Propenoic acid C3:1        | 0,039010144                     | 0,243633966 | 0,498706146       |
| 73,02977706 | HMDB0000237, HMDB0003052, HMDB0003453, HMDB0006458, HMDB0006961, HMDB00237, HMDB0031229, HMDB0031523, HMDB03052, HMDB03453, HMDB06458, HMDB06949, HMDB06961, HMDB31229, HMDB31523                                                                                                                                                                       | C3:0 (Propionic acid)      | -0,144203463                    | 0,025122616 | 0,116156048       |
| 74,02498759 | HMDB0000123, HMDB001123, HMDB0014691, HMDB0031239, HMDB14691, HMDB31239                                                                                                                                                                                                                                                                                 | Glycine                    | 0,328571656                     | 0,049944148 | 0,179616493       |
| 75,00907533 | HMDB0000115, HMDB00115, HMDB0031608, HMDB03035, HMDB31608                                                                                                                                                                                                                                                                                               | Glycolate                  | 0,128822003                     | 0,99015596  | 0,99357422        |
| 77,0396704  | HMDB0001505, HMDB01505                                                                                                                                                                                                                                                                                                                                  | Benzene                    | -0,169162951                    | 0,561101246 | 0,759751998       |
| 83,01324813 | HMDB0032330, HMDB0094691, HMDB32330, HMDB94691                                                                                                                                                                                                                                                                                                          | Hydroxybutynal             | 0,005317975                     | 0,008881361 | 0,055517278       |
| 83,04853138 | HMDB0001184, HMDB0012157, HMDB0031407, HMDB0031512, HMDB0031530, HMDB0031601, HMDB0031606, HMDB0031607, HMDB0032458, HMDB0037788, HMDB0040584, HMDB01184, HMDB12157, HMDB31407, HMDB31512, HMDB31530, HMDB31601, HMDB31606, HMDB31607, HMDB32458, HMDB37788, HMDB40584                                                                                  | Methyl propenyl ketone     | 0,158031951                     | 0,140497509 | 0,361397723       |
| 85,02983961 | HMDB0000549, HMDB0002523, HMDB0003407, HMDB0010720, HMDB0031209, HMDB0033977, HMDB0034439, HMDB00549, HMDB02523, HMDB03407, HMDB10720, HMDB31209, HMDB33977, HMDB34439                                                                                                                                                                                  | Succinic aldehyde          | 0,016142108                     | 0,002618057 | 0,02284884        |
| 87,00900705 | HMDB0000243, HMDB0011111, HMDB00243, HMDB0040261, HMDB0062676, HMDB11111, HMDB11666, HMDB40261, HMDB62676                                                                                                                                                                                                                                               | Pyruvate                   | 0,054294652                     | 0,226967723 | 0,474056558       |
| 88,04039785 | HMDB0000056, HMDB0000161, HMDB0000271, HMDB0001310, HMDB00056, HMDB00161, HMDB00271, HMDB0031219, HMDB0062251, HMDB01310, HMDB31219, HMDB62251                                                                                                                                                                                                          | Alanine                    | 0,137746726                     | 0,163317507 | 0,39192014        |
| 89,02441532 | HMDB0000190, HMDB0000700, HMDB0001051, HMDB0001311, HMDB0001882, HMDB000171, HMDB000190, HMDB0029580, HMDB0031232, HMDB0041929, HMDB0062492, HMDB00700, HMDB01051, HMDB01311, HMDB0144295, HMDB01882, HMDB03328, HMDB29580, HMDB31232, HMDB41929, HMDB62492                                                                                             | Lactate                    | -0,109148618                    | 0,193150353 | 0,434090483       |
| 91,04019269 | HMDB0000131, HMDB00131                                                                                                                                                                                                                                                                                                                                  | Glycerol                   | -0,085712366                    | 0,117267973 | 0,314638992       |
| 95,01352128 | HMDB0032914, HMDB0060503, HMDB32914, HMDB60503                                                                                                                                                                                                                                                                                                          | Furfural                   | 0,045671925                     | 0,108797979 | 0,296474493       |
| 102,0563395 | HMDB0000092, HMDB0000112, HMDB0000452, HMDB0000650, HMDB0001906, HMDB0002166, HMDB0002299, HMDB0003911, HMDB00092, HMDB00112, HMDB0031329, HMDB0031654, HMDB0038394, HMDB0041945, HMDB00452, HMDB00485, HMDB00581, HMDB00650, HMDB0094692, HMDB01906, HMDB02166, HMDB02299, HMDB03911, HMDB05815, HMDB31329, HMDB31654, HMDB38394, HMDB41945, HMDB94692 | Aminobutanoic acid (ABA)   | -0,115962132                    | 0,552154738 | 0,757042346       |
| 103,0400697 | HMDB0000008, HMDB0000011, HMDB0000023, HMDB0000336, HMDB0000357, HMDB0000442, HMDB0000710, HMDB0000729, HMDB00008, HMDB00011, HMDB00023, HMDB0031212, HMDB00336, HMDB00357, HMDB00435, HMDB00442, HMDB0059748, HMDB00710, HMDB00729, HMDB00758, HMDB0126088, HMDB11597, HMDB31212, HMDB59748                                                            | Hydroxybutanoic acid       | -0,771260478                    | 0,043011394 | 0,165955466       |
| 104,0353768 | HMDB0000187, HMDB0003406, HMDB00187, HMDB00589, HMDB0062263, HMDB03406, HMDB62263                                                                                                                                                                                                                                                                       | Serine                     | 0,025370129                     | 0,341457632 | 0,602734929       |
| 105,0194147 | HMDB0000139, HMDB0006372, HMDB00139, HMDB0031818, HMDB06372, HMDB31818                                                                                                                                                                                                                                                                                  | D-Glyceric acid            | 0,040995689                     | 0,693655637 | 0,844166993       |
| 105,0337329 | HMDB0006115, HMDB06115                                                                                                                                                                                                                                                                                                                                  | Aromatic aldehyde          | -0,037614384                    | 0,212269501 | 0,458862942       |
| 107,0363561 | HMDB0034260, HMDB34260                                                                                                                                                                                                                                                                                                                                  | 2,2-Dihydroperoxypropane   | -0,186460199                    | 0,28384517  | 0,546386287       |
| 107,0502731 | HMDB0001858, HMDB0002048, HMDB0002055, HMDB0003119, HMDB0033895, HMDB01858, HMDB02048, HMDB02055, HMDB03119, HMDB13762, HMDB33895                                                                                                                                                                                                                       | Benzyl alcohol             | -0,554666822                    | 0,223355571 | 0,473219052       |
| 108,0458755 | HMDB0001169, HMDB0035882, HMDB0040582, HMDB01169, HMDB35882, HMDB40582                                                                                                                                                                                                                                                                                  | Aminophenol                | 0,30703516                      | 0,409585657 | 0,651952668       |
| 109,029373  | HMDB0000957, HMDB0002434, HMDB0031180, HMDB0032037, HMDB0033002, HMDB0033127, HMDB00957, HMDB02434, HMDB31180, HMDB32037, HMDB33002, HMDB33127                                                                                                                                                                                                          | Catechol                   | 0,343372377                     | 0,445812269 | 0,680478358       |
| 109,0396647 | HMDB0003905, HMDB0033156, HMDB0060741, HMDB03905, HMDB06237, HMDB33156, HMDB60741                                                                                                                                                                                                                                                                       | N-Acetylimidazole          | 0,244245941                     | 0,325970343 | 0,58972228        |
| 110,0251315 | HMDB0004230, HMDB0038175, HMDB03094, HMDB04230, HMDB38175                                                                                                                                                                                                                                                                                               | Pyrrrole-2-carboxylic acid | 0,068140153                     | 0,182159084 | 0,417740595       |
| 110,0723083 | HMDB0000870, HMDB0014417, HMDB0060263, HMDB00870, HMDB14417, HMDB60263                                                                                                                                                                                                                                                                                  | Histamine                  | -0,081319304                    | 0,486186777 | 0,710703477       |
| 110,9916883 | HMDB0029717, HMDB29717                                                                                                                                                                                                                                                                                                                                  | 2-Thiophenecarboxaldehyde  | -0,008659459                    | 0,003920246 | 0,030796891       |
| 111,008269  | HMDB0000444, HMDB0000617, HMDB0032994, HMDB0039437, HMDB00444, HMDB00617, HMDB32994, HMDB39437                                                                                                                                                                                                                                                          | Furoic acid                | -0,063755294                    | 0,024751175 | 0,116037769       |
| 111,0195255 | HMDB0000300, HMDB000300, HMDB0060760, HMDB60760                                                                                                                                                                                                                                                                                                         | Uracil                     | -0,216633125                    | 0,216703787 | 0,466581982       |
| 111,081258  | HMDB0031483, HMDB0031486, HMDB0031487, HMDB0031488, HMDB0031539, HMDB0031540, HMDB0031550, HMDB0031551, HMDB0032301, HMDB0033667, HMDB0033827, HMDB0034372, HMDB0040339, HMDB31483, HMDB31486, HMDB31487, HMDB31488, HMDB31539, HMDB31540, HMDB31550, HMDB31551, HMDB32301, HMDB33667, HMDB33827, HMDB34372, HMDB40339                                  | (Z)-4-Heptenal             | -0,589165064                    | 1,88913E-06 | 6,59001E-05       |

Supplementary Appendix  
MIRA Study

| m/z         | HMDB ID alternatives                                                                                                                                                                                                                                                                                                                                                                                                                                       | Suggested annotation            | Comparison [vegan] - [omnivore] |             |                   |
|-------------|------------------------------------------------------------------------------------------------------------------------------------------------------------------------------------------------------------------------------------------------------------------------------------------------------------------------------------------------------------------------------------------------------------------------------------------------------------|---------------------------------|---------------------------------|-------------|-------------------|
|             |                                                                                                                                                                                                                                                                                                                                                                                                                                                            |                                 | Fold Change (log2)              | p-value     | p-value (BH adj.) |
| 112.0518513 | HMDB0000562, HMDB00562                                                                                                                                                                                                                                                                                                                                                                                                                                     | Creatinine                      | -0.006966934                    | 0,971120169 | 0,985816982       |
| 112.9998603 | HMDB0062802, HMDB62802                                                                                                                                                                                                                                                                                                                                                                                                                                     | Parabanic Acid                  | -0.040828885                    | 0,719088965 | 0,860243607       |
| 113.0246394 | HMDB0031859, HMDB0060461, HMDB31859, HMDB60461                                                                                                                                                                                                                                                                                                                                                                                                             | 2-Hydroxy-2,4-pentadienoic acid | 0,014180757                     | 0,716300685 | 0,860243607       |
| 113.0972785 | HMDB0003671, HMDB0004814, HMDB0005841, HMDB0031405, HMDB0031429, HMDB0031475, HMDB0031482, HMDB0031538, HMDB0031549, HMDB0032405, HMDB0038052, HMDB0040191, HMDB0041320, HMDB0059693, HMDB0061896, HMDB03671, HMDB04814, HMDB05841, HMDB31405, HMDB31429, HMDB31475, HMDB31482, HMDB31538, HMDB31549, HMDB32405, HMDB38052, HMDB40191, HMDB41320, HMDB59693, HMDB61896                                                                                     | Heptanone                       | 0,2444565                       | 0,000996689 | 0,011588167       |
| 114.0381225 | HMDB0031328, HMDB0032345, HMDB0040331, HMDB31328, HMDB32345, HMDB40331                                                                                                                                                                                                                                                                                                                                                                                     | l- Isothiocyanatobutane         | -0.005037652                    | 0,349945062 | 0,609086016       |
| 114.0562031 | HMDB0000162, HMDB0003411, HMDB0012880, HMDB00162, HMDB0030409, HMDB0034208, HMDB03411, HMDB12880, HMDB30409, HMDB34208                                                                                                                                                                                                                                                                                                                                     | Proline                         | 0,181360607                     | 0,26060143  | 0,518822937       |
| 115.0033984 | HMDB0000134, HMDB0000176, HMDB00134, HMDB00176                                                                                                                                                                                                                                                                                                                                                                                                             | Fumarate                        | 0,213877272                     | 0,241934154 | 0,496391958       |
| 115.0399639 | HMDB0000019, HMDB0000310, HMDB0000720, HMDB0001865, HMDB00019, HMDB0003771, HMDB0012233, HMDB00310, HMDB0031643, HMDB0034466, HMDB00720, HMDB0128916, HMDB0128917, HMDB0128943, HMDB0129096, HMDB0129097, HMDB0129098, HMDB0132477, HMDB01865, HMDB03771, HMDB04260, HMDB12233, HMDB31643, HMDB34466                                                                                                                                                       | Ketovaline                      | -0.301514837                    | 0,003750264 | 0,029729369       |
| 115.058744  | HMDB0032411, HMDB0040244, HMDB32411, HMDB40244                                                                                                                                                                                                                                                                                                                                                                                                             | 2-Methyl-1-methylthio-2-butene  | 0,12284778                      | 0,74991051  | 0,872880287       |
| 115.0764773 | HMDB0000535, HMDB0000689, HMDB0029762, HMDB0030027, HMDB0030056, HMDB0030059, HMDB0031221, HMDB0031221, HMDB0031248, HMDB0031325, HMDB0031511, HMDB0031580, HMDB0033774, HMDB0033889, HMDB0034163, HMDB0037266, HMDB0040279, HMDB0040327, HMDB00535, HMDB00689, HMDB29762, HMDB30027, HMDB30056, HMDB30059, HMDB31207, HMDB31221, HMDB31246, HMDB31248, HMDB31325, HMDB31511, HMDB31580, HMDB33774, HMDB33889, HMDB34163, HMDB37266, HMDB40279, HMDB40327  | Hexanoic acid                   | -0.05651124                     | 0,034846369 | 0,146086702       |
| 116.0352396 | HMDB0000532, HMDB0006454, HMDB0012249, HMDB00532, HMDB06454, HMDB12249                                                                                                                                                                                                                                                                                                                                                                                     | Aspartate semialdehyde          | -0.309745308                    | 0,016613314 | 0,087798848       |
| 116.0503096 | HMDB0000738, HMDB0034171, HMDB00738, HMDB34171                                                                                                                                                                                                                                                                                                                                                                                                             | Indole                          | 0,052730753                     | 0,981038995 | 0,992419958       |
| 116.0715802 | HMDB0000043, HMDB0000883, HMDB0001382, HMDB0002141, HMDB0003355, HMDB00043, HMDB0013716, HMDB0015550, HMDB00883, HMDB01382, HMDB02141, HMDB03355, HMDB13716, HMDB15550, HMDB34366                                                                                                                                                                                                                                                                          | Valine, Betaine                 | -0.36046302                     | 0,002591371 | 0,02284884        |
| 117.0555408 | HMDB0000351, HMDB0000354, HMDB0000396, HMDB0000407, HMDB0000410, HMDB0000531, HMDB0000642, HMDB0000754, HMDB0001863, HMDB0001987, HMDB0002011, HMDB000351, HMDB000354, HMDB000396, HMDB00407, HMDB0040735, HMDB00410, HMDB0041603, HMDB00420, HMDB00531, HMDB0059844, HMDB00605, HMDB0061927, HMDB0062584, HMDB00642, HMDB00754, HMDB0130836, HMDB01863, HMDB01987, HMDB02011, HMDB02187, HMDB02321, HMDB40735, HMDB41603, HMDB59844, HMDB61927, HMDB62584 | 5-Hydroxypentanoic acid         | -0.427088687                    | 0,006071676 | 0,041385986       |
| 117.0749191 | HMDB0029579, HMDB0031431, HMDB0039806, HMDB29579, HMDB31431, HMDB39806                                                                                                                                                                                                                                                                                                                                                                                     | Diisopropyl sulfide             | -0.357483545                    | 0,002323213 | 0,021102518       |
| 118.0507756 | HMDB0000167, HMDB0000719, HMDB0004041, HMDB00167, HMDB0061148, HMDB0061877, HMDB00719, HMDB04041, HMDB61148, HMDB61877                                                                                                                                                                                                                                                                                                                                     | Threonine                       | -0.049502965                    | 0,594416494 | 0,766762104       |
| 119.0350988 | HMDB0000337, HMDB0000360, HMDB0000498, HMDB0002453, HMDB0002601, HMDB0002649, HMDB0006293, HMDB00337, HMDB00360, HMDB00498, HMDB02453, HMDB02601, HMDB02649, HMDB06118, HMDB06293                                                                                                                                                                                                                                                                          | Tetrose                         | -0.095567099                    | 0,308357927 | 0,56847381        |
| 119.0501843 | HMDB0004072, HMDB0006236, HMDB0013815, HMDB0029636, HMDB0029637, HMDB0029638, HMDB0033910, HMDB0038997, HMDB0062765, HMDB0124943, HMDB04072, HMDB06236, HMDB13815, HMDB29636, HMDB29637, HMDB29638, HMDB33910, HMDB38997, HMDB62765                                                                                                                                                                                                                        | Phenylacetaldehyde              | 0,348822151                     | 0,028505436 | 0,126820105       |
| 120.0116443 | HMDB0000574, HMDB0003417, HMDB000574, HMDB03417                                                                                                                                                                                                                                                                                                                                                                                                            | Cys                             | 0,025544419                     | 0,675060796 | 0,831430811       |
| 120.0450635 | HMDB0004461, HMDB0033131, HMDB0035281, HMDB04461, HMDB33131, HMDB35281                                                                                                                                                                                                                                                                                                                                                                                     | Benzamide                       | 0,150362048                     | 0,772766528 | 0,885482802       |
| 121.0297413 | HMDB0001870, HMDB0011718, HMDB0032918, HMDB0034170, HMDB01870, HMDB11718, HMDB32918, HMDB34170                                                                                                                                                                                                                                                                                                                                                             | Benzoate                        | -0.006037973                    | 0,888450735 | 0,954337611       |
| 121.0660083 | HMDB0029306, HMDB0030540, HMDB0032074, HMDB0032076, HMDB0032148, HMDB0032150, HMDB0032151, HMDB0032619, HMDB0033944, HMDB0041609, HMDB0059873, HMDB29306, HMDB30540, HMDB32074, HMDB32076, HMDB32148, HMDB32150, HMDB32151, HMDB32619, HMDB33944, HMDB41609, HMDB59873                                                                                                                                                                                     | Phenylethyl alcohol             | 0,147343181                     | 0,921306244 | 0,966761787       |
| 121.1025331 | HMDB00038140, HMDB0061784, HMDB38140, HMDB61784                                                                                                                                                                                                                                                                                                                                                                                                            | Santene                         | 1,019676189                     | 0,004096275 | 0,031307269       |
| 124.0076111 | HMDB0000251, HMDB00251                                                                                                                                                                                                                                                                                                                                                                                                                                     | Taurine                         | -0.452509815                    | 0,005203949 | 0,038133139       |
| 126.0028012 | HMDB0032964, HMDB32964                                                                                                                                                                                                                                                                                                                                                                                                                                     | 2-Acetylthiazole                | -0.478555665                    | 0,004613137 | 0,034381671       |
| 126.0192196 | HMDB0034368, HMDB34368                                                                                                                                                                                                                                                                                                                                                                                                                                     | 2,3,6-Trihydroxypyridine        | -0.101341057                    | 0,248215325 | 0,50335759        |
| 126.9053791 | HMDB0059634, HMDB59634                                                                                                                                                                                                                                                                                                                                                                                                                                     | I(-)                            | 0,306178856                     | 0,736718055 | 0,867582504       |
| 127.0033099 | HMDB0059784, HMDB59784                                                                                                                                                                                                                                                                                                                                                                                                                                     | 5-Hydroxy-2-furoic acid         | 0,002760004                     | 0,968357421 | 0,985306501       |
| 127.0141638 | HMDB0041833, HMDB41833                                                                                                                                                                                                                                                                                                                                                                                                                                     | Barbiturate                     | 0,064246657                     | 0,376960033 | 0,628506977       |
| 127.0514138 | HMDB0000079, HMDB00079, HMDB0029874, HMDB0031547, HMDB0062558, HMDB29874, HMDB31547, HMDB62558                                                                                                                                                                                                                                                                                                                                                             | Dihydrothymine                  | 0,146386784                     | 0,471717782 | 0,700188213       |
| 128.0102858 | HMDB0041861, HMDB41861                                                                                                                                                                                                                                                                                                                                                                                                                                     | Cyanuric acid                   | -0.051306049                    | 0,001320782 | 0,014218788       |
| 128.0350019 | HMDB0000267, HMDB0000805, HMDB0001369, HMDB0001843, HMDB0002234, HMDB00267, HMDB0060262, HMDB0061093, HMDB0062585, HMDB00805, HMDB01369, HMDB01843, HMDB02234, HMDB60262, HMDB61093, HMDB62585                                                                                                                                                                                                                                                             | Oxoproline                      | 0,026010978                     | 0,410139685 | 0,651952668       |

Supplementary Appendix  
MIRA Study

| m/z         | HMDB ID alternatives                                                                                                                                                                                                                                                                                                                                                                                                                                                                                                   | Suggested annotation             | Comparison [vegan] - [omnivore] |             |                   |
|-------------|------------------------------------------------------------------------------------------------------------------------------------------------------------------------------------------------------------------------------------------------------------------------------------------------------------------------------------------------------------------------------------------------------------------------------------------------------------------------------------------------------------------------|----------------------------------|---------------------------------|-------------|-------------------|
|             |                                                                                                                                                                                                                                                                                                                                                                                                                                                                                                                        |                                  | Fold Change (log2)              | p-value     | p-value (BH adj.) |
| 128,0710005 | HMDB0000070, HMDB0000716, HMDB0004226, HMDB0005960, HMDB00070, HMDB0015212, HMDB0029435, HMDB0029444, HMDB0059649, HMDB0062225, HMDB00716, HMDB0094696, HMDB0094697, HMDB04226, HMDB05960, HMDB15212, HMDB29435, HMDB29444, HMDB59649, HMDB62225, HMDB94696, HMDB94697                                                                                                                                                                                                                                                 | Pipecolate                       | 0,451945857                     | 5,11817E-05 | 0,000976502       |
| 129,0192608 | HMDB0000620, HMDB0000634, HMDB0000749, HMDB0002092, HMDB0013233, HMDB0033809, HMDB0059743, HMDB0060365, HMDB0061185, HMDB00620, HMDB00634, HMDB00749, HMDB01657, HMDB02092, HMDB13233, HMDB33809, HMDB59743, HMDB60365, HMDB61185                                                                                                                                                                                                                                                                                      | Itaconate                        | 0,037326516                     | 0,010707244 | 0,063085924       |
| 129,0386557 | HMDB0031370, HMDB0037493, HMDB0040238, HMDB31370, HMDB37493, HMDB40238                                                                                                                                                                                                                                                                                                                                                                                                                                                 | 2-[(Methylthio)methyl]-2-butenal | -0,116806177                    | 0,910423618 | 0,962636298       |
| 129,0902986 | HMDB0000666, HMDB0030028, HMDB0030052, HMDB0031528, HMDB0031594, HMDB0031595, HMDB0031600, HMDB0032204, HMDB0032874, HMDB0033745, HMDB0034166, HMDB0034239, HMDB0035238, HMDB0036209, HMDB0036237, HMDB0036238, HMDB0038227, HMDB0039095, HMDB0039618, HMDB0039619, HMDB0040297, HMDB00666, HMDB30028, HMDB30052, HMDB31528, HMDB31594, HMDB31595, HMDB31600, HMDB32204, HMDB32874, HMDB33745, HMDB34166, HMDB34239, HMDB35238, HMDB36209, HMDB36237, HMDB36238, HMDB38227, HMDB39095, HMDB39618, HMDB39619, HMDB40297 | Ethyl isovalerate                | -0,140694289                    | 0,045045794 | 0,168598232       |
| 129,1039234 | HMDB0002064, HMDB0060268, HMDB02064, HMDB60268                                                                                                                                                                                                                                                                                                                                                                                                                                                                         | N-Acetylputrescine               | -0,065928229                    | 0,064596254 | 0,209979201       |
| 130,051576  | HMDB0000725, HMDB0000766, HMDB0000783, HMDB0001149, HMDB0002104, HMDB0002113, HMDB0006055, HMDB0006272, HMDB0036576, HMDB0059659, HMDB0060460, HMDB0061880, HMDB00725, HMDB00766, HMDB00783, HMDB01149, HMDB02104, HMDB02113, HMDB0240251, HMDB06055, HMDB06272, HMDB36576, HMDB59659, HMDB60460, HMDB61880                                                                                                                                                                                                            | 5-Aminolevulinic acid            | -0,08385991                     | 0,179459013 | 0,416192178       |
| 130,0871687 | HMDB0000172, HMDB0000557, HMDB0000687, HMDB0001645, HMDB0001901, HMDB0003640, HMDB0013773, HMDB00172, HMDB0029168, HMDB0033923, HMDB0036382, HMDB00557, HMDB0060650, HMDB0061716, HMDB0062203, HMDB00687, HMDB01645, HMDB01901, HMDB02002, HMDB02291, HMDB03640, HMDB13773, HMDB29168, HMDB33923, HMDB36382, HMDB60650, HMDB61716, HMDB62203                                                                                                                                                                           | (Iso)Leucine                     | -0,388966263                    | 0,003019489 | 0,025563055       |
| 131,035504  | HMDB0000576, HMDB0000622, HMDB0000661, HMDB0001844, HMDB0002001, HMDB0006833, HMDB0006855, HMDB0029884, HMDB0033958, HMDB0040531, HMDB00576, HMDB0061879, HMDB00622, HMDB00661, HMDB01844, HMDB02001, HMDB06833, HMDB06855, HMDB29884, HMDB33958, HMDB40531, HMDB61879                                                                                                                                                                                                                                                 | Glutarate                        | 0,036685735                     | 0,457571664 | 0,691905798       |
| 131,0459213 | HMDB0000026, HMDB0000168, HMDB00026, HMDB0011733, HMDB0012265, HMDB00168, HMDB0033780, HMDB11733, HMDB12265, HMDB33780                                                                                                                                                                                                                                                                                                                                                                                                 | Asparagine                       | -0,001848173                    | 0,84165977  | 0,923179018       |
| 131,0716322 | HMDB0000317, HMDB0000409, HMDB0000525, HMDB0000624, HMDB0000665, HMDB0000746, HMDB0001624, HMDB0001975, HMDB0010718, HMDB0012843, HMDB0029166, HMDB00317, HMDB0032158, HMDB0032456, HMDB0033851, HMDB0040409, HMDB00409, HMDB0041844, HMDB00525, HMDB0059770, HMDB0061652, HMDB00624, HMDB00665, HMDB00746, HMDB01624, HMDB01975, HMDB10718, HMDB12843, HMDB29166, HMDB32158, HMDB32456, HMDB33851, HMDB40409, HMDB41844, HMDB59770, HMDB61652                                                                         | D-2-Hydroxyisocaproate           | -0,005249042                    | 0,838810633 | 0,921212686       |
| 131,0828955 | HMDB0000214, HMDB0003374, HMDB00214, HMDB00818, HMDB03374, HMDB04984                                                                                                                                                                                                                                                                                                                                                                                                                                                   | Ornithine                        | 0,136067459                     | 0,51537644  | 0,730874126       |
| 132,0298522 | HMDB0000191, HMDB0006483, HMDB0011753, HMDB00191, HMDB0062186, HMDB06483, HMDB11753, HMDB62186                                                                                                                                                                                                                                                                                                                                                                                                                         | Aspartate                        | -0,276252997                    | 0,93531185  | 0,975689772       |
| 132,0451062 | HMDB0004094, HMDB0029757, HMDB0032390, HMDB0034666, HMDB0059805, HMDB0060486, HMDB0061918, HMDB04094, HMDB29757, HMDB32390, HMDB34666, HMDB59805, HMDB60486, HMDB61918                                                                                                                                                                                                                                                                                                                                                 | Mandelonitrile                   | -0,193246837                    | 0,042515918 | 0,1647728         |
| 132,0662072 | HMDB0031658, HMDB0032356, HMDB0039499, HMDB31658, HMDB32356, HMDB39499                                                                                                                                                                                                                                                                                                                                                                                                                                                 | Hydroxy-valine                   | 0,364370804                     | 0,156575411 | 0,382286785       |
| 133,0134686 | HMDB0000156, HMDB0000744, HMDB00156, HMDB0031518, HMDB0032872, HMDB00744, HMDB31518, HMDB32872                                                                                                                                                                                                                                                                                                                                                                                                                         | Malate                           | 0,004741406                     | 0,047929661 | 0,174912962       |
| 133,0277067 | HMDB0032469, HMDB0061916, HMDB0129378, HMDB32469, HMDB61916                                                                                                                                                                                                                                                                                                                                                                                                                                                            | Phthalide                        | 0,052917972                     | 0,107397883 | 0,295428876       |
| 133,0504291 | HMDB0000421, HMDB0001292, HMDB0003224, HMDB0012141, HMDB0012485, HMDB0029576, HMDB00421, HMDB0127615, HMDB01292, HMDB03224, HMDB12141, HMDB12485, HMDB29576                                                                                                                                                                                                                                                                                                                                                            | Deoxyribose                      | 0,568375853                     | 0,048141182 | 0,174912962       |
| 133,0657126 | HMDB0029639, HMDB0029697, HMDB0029698, HMDB0030839, HMDB0031626, HMDB0032024, HMDB0033142, HMDB0032608, HMDB0032623, HMDB0033716, HMDB0034107, HMDB0034563, HMDB0036441, HMDB0059601, HMDB0059895, HMDB29639, HMDB29697, HMDB29698, HMDB30839, HMDB31626, HMDB32024, HMDB32142, HMDB32608, HMDB32623, HMDB33716, HMDB34107, HMDB34563, HMDB36441, HMDB59601, HMDB59895                                                                                                                                                 | Indan-1-ol                       | 0,53872027                      | 0,393884561 | 0,641527233       |
| 134,0051634 | HMDB0032930, HMDB32930                                                                                                                                                                                                                                                                                                                                                                                                                                                                                                 | Benzothiazole                    | 0,024454281                     | 0,50707781  | 0,727256333       |
| 134,0231899 | HMDB0032931, HMDB32931                                                                                                                                                                                                                                                                                                                                                                                                                                                                                                 | 2-Benzoxazolol                   | 0,013676696                     | 0,815187762 | 0,911338113       |
| 134,0472032 | HMDB0000034, HMDB00034                                                                                                                                                                                                                                                                                                                                                                                                                                                                                                 | Adenine                          | -0,030272207                    | 0,404599428 | 0,647359085       |
| 134,0613167 | HMDB0001250, HMDB0010715, HMDB0032628, HMDB0032630, HMDB0037071, HMDB0037072, HMDB0040008, HMDB0040013, HMDB0040222, HMDB0040223, HMDB0040224, HMDB01250, HMDB10715, HMDB32628, HMDB32630, HMDB37071, HMDB37072, HMDB40008, HMDB40013, HMDB40222, HMDB40223, HMDB40224                                                                                                                                                                                                                                                 | 2-Phenylacetamide                | -0,722370264                    | 0,068354751 | 0,214705473       |
| 135,0305049 | HMDB0000613, HMDB0000943, HMDB00613, HMDB0062620, HMDB00943, HMDB62620                                                                                                                                                                                                                                                                                                                                                                                                                                                 | Threonate                        | 0,147094674                     | 0,7352115   | 0,867529672       |
| 135,0305049 | HMDB0031160, HMDB0033053, HMDB0033054, HMDB31160, HMDB33053, HMDB33054                                                                                                                                                                                                                                                                                                                                                                                                                                                 | 1-Pentanesulphenothioic acid     | 0,147094674                     | 0,7352115   | 0,867529672       |
| 135,0305049 | HMDB0000157, HMDB0014581, HMDB00157, HMDB14581                                                                                                                                                                                                                                                                                                                                                                                                                                                                         | Hypoxanthine                     | 0,147094674                     | 0,7352115   | 0,867529672       |



Supplementary Appendix  
MIRA Study

| m/z         | HMDB ID alternatives                                                                                                                                                                                                                                                                                                                                                                                                                                                                                                                                                                                                                                                                                                                                                                                                                           | Suggested annotation                                | Comparison [vegan] - [omnivore] |             |                   |
|-------------|------------------------------------------------------------------------------------------------------------------------------------------------------------------------------------------------------------------------------------------------------------------------------------------------------------------------------------------------------------------------------------------------------------------------------------------------------------------------------------------------------------------------------------------------------------------------------------------------------------------------------------------------------------------------------------------------------------------------------------------------------------------------------------------------------------------------------------------------|-----------------------------------------------------|---------------------------------|-------------|-------------------|
|             |                                                                                                                                                                                                                                                                                                                                                                                                                                                                                                                                                                                                                                                                                                                                                                                                                                                |                                                     | Fold Change (log2)              | p-value     | p-value (BH adj.) |
| 135,0809615 | HMDB0029667, HMDB0031312, HMDB0031446, HMDB0031627, HMDB0031628, HMDB0032029, HMDB0032149, HMDB0032441, HMDB0032544, HMDB0032621, HMDB0032624, HMDB0032625, HMDB0033962, HMDB0034378, HMDB0038984, HMDB0038985, HMDB0038986, HMDB0038987, HMDB0038988, HMDB0039782, HMDB0059896, HMDB0125105, HMDB29667, HMDB31312, HMDB31446, HMDB31627, HMDB31628, HMDB32029, HMDB32149, HMDB32441, HMDB32544, HMDB32621, HMDB32624, HMDB32625, HMDB33962, HMDB34378, HMDB38984, HMDB38985, HMDB38986, HMDB38987, HMDB38988, HMDB39782, HMDB59896                                                                                                                                                                                                                                                                                                            | 4-Propylphenol                                      | 0,066110224                     | 0,794479319 | 0,897391148       |
| 141,1274613 | HMDB0013821, HMDB0029557, HMDB0030959, HMDB0031266, HMDB0031267, HMDB0031268, HMDB0031417, HMDB0031684, HMDB0031730, HMDB0034152, HMDB0037304, HMDB0040581, HMDB0041498, HMDB0041499, HMDB0041601, HMDB0059835, HMDB0059887, HMDB13821, HMDB13822, HMDB29557, HMDB30959, HMDB31266, HMDB31267, HMDB31268, HMDB31417, HMDB31684, HMDB31730, HMDB34152, HMDB37304, HMDB40581, HMDB41498, HMDB41499, HMDB41601, HMDB59835, HMDB59887                                                                                                                                                                                                                                                                                                                                                                                                              | 2-Methyl-4-heptanone                                | 0,102037682                     | 0,29144772  | 0,553687172       |
| 142,0505534 | HMDB0000894, HMDB0014491, HMDB0032161, HMDB0061082, HMDB0061705, HMDB00894, HMDB006723, HMDB006724, HMDB14491, HMDB32161, HMDB61082, HMDB61705                                                                                                                                                                                                                                                                                                                                                                                                                                                                                                                                                                                                                                                                                                 | 2-Hydroxymethylclavam                               | 0,093145139                     | 0,210055202 | 0,455642129       |
| 142,0660756 | HMDB0033115, HMDB0041802, HMDB0042004, HMDB33115, HMDB41802, HMDB42004                                                                                                                                                                                                                                                                                                                                                                                                                                                                                                                                                                                                                                                                                                                                                                         | 6-Methylquinoline                                   | 1,082353629                     | 0,010663842 | 0,063085924       |
| 142,9982082 | HMDB0062781, HMDB62781                                                                                                                                                                                                                                                                                                                                                                                                                                                                                                                                                                                                                                                                                                                                                                                                                         | 2-oxoglutarate(2-)                                  | 0,086641029                     | 0,003967555 | 0,030890252       |
| 143,0334447 | HMDB0000393, HMDB0000522, HMDB0002266, HMDB0013311, HMDB0029171, HMDB0031257, HMDB0036232, HMDB00393, HMDB0040207, HMDB00522, HMDB02266, HMDB003520, HMDB13311, HMDB29171, HMDB31257, HMDB36232, HMDB40207                                                                                                                                                                                                                                                                                                                                                                                                                                                                                                                                                                                                                                     | 2,3-Dimethylmaleate                                 | 0,023979982                     | 0,50115572  | 0,722211629       |
| 143,0704383 | HMDB0001988, HMDB0031176, HMDB0036594, HMDB0037114, HMDB0040433, HMDB01988, HMDB31176, HMDB36594, HMDB37114, HMDB40433                                                                                                                                                                                                                                                                                                                                                                                                                                                                                                                                                                                                                                                                                                                         | trans-4-Hydroxycyclohexanecar                       | 0,374828446                     | 0,077642333 | 0,234270293       |
| 143,1076911 | HMDB0000482, HMDB0001877, HMDB0029980, HMDB0030368, HMDB0031230, HMDB0031290, HMDB0031478, HMDB0031579, HMDB0031587, HMDB0031588, HMDB0031596, HMDB0031638, HMDB0031703, HMDB0032046, HMDB0032047, HMDB0032203, HMDB0032225, HMDB0032272, HMDB0032335, HMDB0032551, HMDB0034161, HMDB0034164, HMDB0034234, HMDB0034459, HMDB0035457, HMDB0036165, HMDB0039217, HMDB0039620, HMDB0040209, HMDB0040251, HMDB0040252, HMDB0040296, HMDB0040298, HMDB00482, HMDB0061931, HMDB01877, HMDB29980, HMDB30368, HMDB31230, HMDB31290, HMDB31478, HMDB31579, HMDB31587, HMDB31588, HMDB31596, HMDB31638, HMDB31703, HMDB32046, HMDB32047, HMDB32203, HMDB32225, HMDB32272, HMDB32335, HMDB32551, HMDB34161, HMDB34164, HMDB34234, HMDB34459, HMDB35457, HMDB36165, HMDB39217, HMDB39620, HMDB40209, HMDB40251, HMDB40252, HMDB40296, HMDB40298, HMDB61931 | Octanoic acid                                       | -0,837790934                    | 0,012728721 | 0,072074317       |
| 144,0450713 | HMDB0029737, HMDB29737                                                                                                                                                                                                                                                                                                                                                                                                                                                                                                                                                                                                                                                                                                                                                                                                                         | 3-Methyleneoxindole                                 | 0,056355139                     | 0,146573226 | 0,371546085       |
| 144,0663993 | HMDB0000730, HMDB0000808, HMDB0001263, HMDB0003681, HMDB0012131, HMDB0012151, HMDB0015127, HMDB0029425, HMDB0029426, HMDB0059595, HMDB0060265, HMDB0061156, HMDB00730, HMDB00808, HMDB0094698, HMDB01263, HMDB03681, HMDB06238, HMDB12131, HMDB12151, HMDB15127, HMDB29425, HMDB29426, HMDB59595, HMDB60265, HMDB61156, HMDB94698                                                                                                                                                                                                                                                                                                                                                                                                                                                                                                              | 4-Acetamidobutanoate                                | 0,029609154                     | 0,53506971  | 0,747725621       |
| 144,0799435 | HMDB0032967, HMDB32967                                                                                                                                                                                                                                                                                                                                                                                                                                                                                                                                                                                                                                                                                                                                                                                                                         | 2,4-Dimethyl-1H-indole                              | 0,219564288                     | 0,281826833 | 0,546386287       |
| 145,0146434 | HMDB0000208, HMDB0013701, HMDB00208, HMDB0062739, HMDB02812, HMDB13701, HMDB62739                                                                                                                                                                                                                                                                                                                                                                                                                                                                                                                                                                                                                                                                                                                                                              | Oxoglutarate                                        | 0,069890122                     | 0,813182794 | 0,910263667       |
| 145,0146434 | HMDB0033966, HMDB0041390, HMDB0041393, HMDB33966, HMDB41390, HMDB41393                                                                                                                                                                                                                                                                                                                                                                                                                                                                                                                                                                                                                                                                                                                                                                         | Di-2-propenyl disulfide, 9CI                        | 0,069890122                     | 0,813182794 | 0,910263667       |
| 145,061322  | HMDB0000641, HMDB0002031, HMDB0003423, HMDB0006899, HMDB0028687, HMDB00641, HMDB02031, HMDB03423, HMDB06899, HMDB28687                                                                                                                                                                                                                                                                                                                                                                                                                                                                                                                                                                                                                                                                                                                         | Glutamine                                           | 0,136449766                     | 0,348838114 | 0,608373671       |
| 145,0979856 | HMDB0000182, HMDB0003405, HMDB0012114, HMDB0012115, HMDB00182, HMDB0142894, HMDB03405, HMDB12114, HMDB12115                                                                                                                                                                                                                                                                                                                                                                                                                                                                                                                                                                                                                                                                                                                                    | Lysine                                              | -0,113509189                    | 0,639924091 | 0,801743976       |
| 146,0456443 | HMDB0000148, HMDB0002393, HMDB0002931, HMDB0003011, HMDB0003339, HMDB0006556, HMDB00148, HMDB0033550, HMDB0060475, HMDB006183, HMDB02393, HMDB02931, HMDB03011, HMDB03339, HMDB06556, HMDB33550, HMDB60475, HMDB62183                                                                                                                                                                                                                                                                                                                                                                                                                                                                                                                                                                                                                          | Glutamate                                           | -0,137740861                    | 0,788778202 | 0,894427298       |
| 146,0808772 | HMDB0029449, HMDB0033453, HMDB0061157, HMDB0142963, HMDB29449, HMDB33453, HMDB61157                                                                                                                                                                                                                                                                                                                                                                                                                                                                                                                                                                                                                                                                                                                                                            | (2R,3R,4R)-2-Amino-4-hydroxy-3-methylpentanoic acid | 0,007753521                     | 0,550580643 | 0,756072946       |
| 147,0297733 | HMDB0000426, HMDB0000428, HMDB0000606, HMDB0000694, HMDB0001900, HMDB0011676, HMDB00426, HMDB00428, HMDB0059655, HMDB00606, HMDB00694, HMDB01900, HMDB02323, HMDB11676, HMDB59655                                                                                                                                                                                                                                                                                                                                                                                                                                                                                                                                                                                                                                                              | Hydroxyglutarate                                    | -0,065752011                    | 0,041953125 | 0,164049886       |
| 147,0297733 | HMDB0033912, HMDB0038890, HMDB0041392, HMDB33912, HMDB38890, HMDB41392                                                                                                                                                                                                                                                                                                                                                                                                                                                                                                                                                                                                                                                                                                                                                                         | 2-Propenyl propyl disulfide                         | -0,065752011                    | 0,041953125 | 0,164049886       |
| 147,0443588 | HMDB0000567, HMDB0000930, HMDB0031725, HMDB0032947, HMDB0035243, HMDB0036626, HMDB0040986, HMDB00567, HMDB00930, HMDB0128078, HMDB0134039, HMDB0135273, HMDB0135274, HMDB0135275, HMDB0135648, HMDB31725, HMDB32947, HMDB35243, HMDB36626, HMDB40986                                                                                                                                                                                                                                                                                                                                                                                                                                                                                                                                                                                           | Cinnamate                                           | -0,092885011                    | 0,410461026 | 0,651952668       |
| 147,0655932 | HMDB0000227, HMDB0012140, HMDB00227, HMDB0031639, HMDB0059629, HMDB0059705, HMDB12140, HMDB31639, HMDB59629, HMDB59705                                                                                                                                                                                                                                                                                                                                                                                                                                                                                                                                                                                                                                                                                                                         | Mevalonate                                          | 0,262511502                     | 0,032328071 | 0,139554841       |

Supplementary Appendix  
MIRA Study

| m/z         | HMDB ID alternatives                                                                                                                                                                                                                                                                                                                                                                                                                                                                                                                                                                                                                                                                                                                                                                | Suggested annotation               | Comparison [vegan] - [omnivore] |             |                   |
|-------------|-------------------------------------------------------------------------------------------------------------------------------------------------------------------------------------------------------------------------------------------------------------------------------------------------------------------------------------------------------------------------------------------------------------------------------------------------------------------------------------------------------------------------------------------------------------------------------------------------------------------------------------------------------------------------------------------------------------------------------------------------------------------------------------|------------------------------------|---------------------------------|-------------|-------------------|
|             |                                                                                                                                                                                                                                                                                                                                                                                                                                                                                                                                                                                                                                                                                                                                                                                     |                                    | Fold Change (log2)              | p-value     | p-value (BH adj.) |
| 147,0805264 | HMDB0002214, HMDB0030837, HMDB0031616, HMDB0032014, HMDB0032015, HMDB0032016, HMDB0032017, HMDB0032140, HMDB0033382, HMDB0034121, HMDB0059845, HMDB0133593, HMDB0133746, HMDB02214, HMDB30837, HMDB31616, HMDB32014, HMDB32015, HMDB32016, HMDB32017, HMDB32140, HMDB33382, HMDB34121, HMDB59845                                                                                                                                                                                                                                                                                                                                                                                                                                                                                    | Cuminaldehyde                      | 0,099055245                     | 0,642147303 | 0,803375105       |
| 148,043429  | HMDB0000696, HMDB0014997, HMDB0033951, HMDB00696, HMDB14997, HMDB33951                                                                                                                                                                                                                                                                                                                                                                                                                                                                                                                                                                                                                                                                                                              | Methionine                         | 0,075227317                     | 0,726890679 | 0,864557648       |
| 149,0243906 | HMDB0001587, HMDB0031515, HMDB0032598, HMDB0032612, HMDB0040528, HMDB01587, HMDB31515, HMDB32598, HMDB32612, HMDB40528                                                                                                                                                                                                                                                                                                                                                                                                                                                                                                                                                                                                                                                              | Phenylglyoxylic acid               | 0,017852577                     | 0,793534949 | 0,897391148       |
| 149,0456853 | HMDB0000098, HMDB0000283, HMDB0000366, HMDB0000621, HMDB0000646, HMDB0000751, HMDB0001644, HMDB0003371, HMDB00098, HMDB0012194, HMDB0012325, HMDB00283, HMDB0029941, HMDB0029942, HMDB00366, HMDB00487, HMDB0059753, HMDB0060254, HMDB00621, HMDB00646, HMDB00654, HMDB00751, HMDB0094694, HMDB0127617, HMDB01644, HMDB02245, HMDB03371, HMDB03763, HMDB12194, HMDB12325, HMDB29941, HMDB29942, HMDB59753, HMDB60254, HMDB94694                                                                                                                                                                                                                                                                                                                                                     | Pentose                            | 0,17373324                      | 0,151957447 | 0,380720112       |
| 149,0456853 | HMDB0029578, HMDB0031161, HMDB0031472, HMDB0031709, HMDB0032180, HMDB0032408, HMDB0040056, HMDB29578, HMDB31161, HMDB31472, HMDB31709, HMDB32180, HMDB32408, HMDB40056                                                                                                                                                                                                                                                                                                                                                                                                                                                                                                                                                                                                              | Diisopropyl disulfide              | 0,17373324                      | 0,151957447 | 0,380720112       |
| 149,060306  | HMDB0000764, HMDB0002097, HMDB0002222, HMDB0002237, HMDB0003654, HMDB0011743, HMDB0013744, HMDB0031310, HMDB0032073, HMDB0032075, HMDB0032569, HMDB0032570, HMDB0032592, HMDB0032617, HMDB0033967, HMDB0033970, HMDB0037715, HMDB0038355, HMDB0040428, HMDB0040925, HMDB0059824, HMDB0062349, HMDB00764, HMDB0125532, HMDB0134026, HMDB0134027, HMDB0135239, HMDB0135276, HMDB0135277, HMDB0135278, HMDB0135279, HMDB0135280, HMDB0135281, HMDB0135644, HMDB02097, HMDB02222, HMDB02237, HMDB03654, HMDB11743, HMDB13744, HMDB31310, HMDB32073, HMDB32075, HMDB32569, HMDB32570, HMDB32592, HMDB32617, HMDB33967, HMDB33970, HMDB37715, HMDB38355, HMDB40428, HMDB40925, HMDB59824, HMDB62349                                                                                       | Hydrocinnamic acid                 | 0,062327786                     | 0,745321344 | 0,872376123       |
| 149,0969442 | HMDB0001878, HMDB0003647, HMDB0004487, HMDB0029652, HMDB0031570, HMDB0031613, HMDB0031817, HMDB0032063, HMDB0032213, HMDB0032626, HMDB0033544, HMDB0034846, HMDB0034921, HMDB0035089, HMDB0035172, HMDB0035250, HMDB0035591, HMDB0035761, HMDB0035770, HMDB0035824, HMDB0036061, HMDB0036070, HMDB0036089, HMDB0036999, HMDB0037561, HMDB0038913, HMDB0061788, HMDB0133616, HMDB01878, HMDB03647, HMDB04487, HMDB06315, HMDB29652, HMDB31570, HMDB31613, HMDB31817, HMDB32063, HMDB32213, HMDB32626, HMDB33544, HMDB34846, HMDB34921, HMDB35089, HMDB35172, HMDB35250, HMDB35591, HMDB35761, HMDB35770, HMDB35824, HMDB36061, HMDB36070, HMDB36089, HMDB36999, HMDB37561, HMDB38913, HMDB61788                                                                                      | Thymol                             | -0,123375755                    | 0,700635242 | 0,847843971       |
| 150,0014886 | HMDB0034413, HMDB0040578, HMDB34413, HMDB40578                                                                                                                                                                                                                                                                                                                                                                                                                                                                                                                                                                                                                                                                                                                                      | 1,2-Benzisothiazol-3(2H)-one       | -0,478232136                    | 0,276371768 | 0,541564452       |
| 150,0562558 | HMDB0001859, HMDB0002210, HMDB0012219, HMDB0012992, HMDB0029703, HMDB0032609, HMDB0033903, HMDB0059846, HMDB0060680, HMDB0061919, HMDB01859, HMDB02210, HMDB12219, HMDB12992, HMDB29703, HMDB32609, HMDB33903, HMDB59846, HMDB60680, HMDB61919                                                                                                                                                                                                                                                                                                                                                                                                                                                                                                                                      | Acetaminophen                      | 0,015712596                     | 0,445226471 | 0,680478358       |
| 151,0258056 | HMDB0000292, HMDB0000786, HMDB001182, HMDB00292, HMDB00786, HMDB01182                                                                                                                                                                                                                                                                                                                                                                                                                                                                                                                                                                                                                                                                                                               | Xanthine                           | -0,447599455                    | 3,24778E-05 | 0,00072617        |
| 151,0401079 | HMDB0000020, HMDB0000440, HMDB0000669, HMDB0000703, HMDB0001101, HMDB00020, HMDB0002390, HMDB0003791, HMDB0004815, HMDB0012308, HMDB0029657, HMDB0029658, HMDB0029659, HMDB0029660, HMDB0029661, HMDB0029662, HMDB0031609, HMDB0032399, HMDB0032572, HMDB0032594, HMDB0032604, HMDB0032606, HMDB0032629, HMDB0032919, HMDB0033003, HMDB0034172, HMDB0036907, HMDB0041283, HMDB00440, HMDB0060390, HMDB0062635, HMDB00669, HMDB00703, HMDB01101, HMDB0124926, HMDB0125528, HMDB0137457, HMDB02390, HMDB03791, HMDB04815, HMDB06256, HMDB06778, HMDB12308, HMDB29657, HMDB29658, HMDB29659, HMDB29660, HMDB29661, HMDB29662, HMDB31609, HMDB32399, HMDB32572, HMDB32594, HMDB32604, HMDB32606, HMDB32629, HMDB32919, HMDB33003, HMDB34172, HMDB36907, HMDB41283, HMDB60390, HMDB62635 | p-Hydroxyphenylacetic acid         | -0,16112806                     | 0,058563209 | 0,198704741       |
| 151,0500454 | HMDB0004193, HMDB0004194, HMDB04193, HMDB04194                                                                                                                                                                                                                                                                                                                                                                                                                                                                                                                                                                                                                                                                                                                                      | N1-Methyl-2-pyridone-5-carboxamide | 0,257121499                     | 0,613835234 | 0,783695935       |

Supplementary Appendix  
MIRA Study

| m/z         | HMDB ID alternatives                                                                                                                                                                                                                                                                                                                                                                                                                                                                                                                                                                                                                                                                                                                                                                                                                                                                                                                                                                                                                                                                                                                                                                                                                                                                                                                                                                                                                                                                                                                                                                                                                                                                                                                                                                                                                                                                                                                                                           | Suggested annotation           | Comparison [vegan] - [omnivore] |             |                   |
|-------------|--------------------------------------------------------------------------------------------------------------------------------------------------------------------------------------------------------------------------------------------------------------------------------------------------------------------------------------------------------------------------------------------------------------------------------------------------------------------------------------------------------------------------------------------------------------------------------------------------------------------------------------------------------------------------------------------------------------------------------------------------------------------------------------------------------------------------------------------------------------------------------------------------------------------------------------------------------------------------------------------------------------------------------------------------------------------------------------------------------------------------------------------------------------------------------------------------------------------------------------------------------------------------------------------------------------------------------------------------------------------------------------------------------------------------------------------------------------------------------------------------------------------------------------------------------------------------------------------------------------------------------------------------------------------------------------------------------------------------------------------------------------------------------------------------------------------------------------------------------------------------------------------------------------------------------------------------------------------------------|--------------------------------|---------------------------------|-------------|-------------------|
|             |                                                                                                                                                                                                                                                                                                                                                                                                                                                                                                                                                                                                                                                                                                                                                                                                                                                                                                                                                                                                                                                                                                                                                                                                                                                                                                                                                                                                                                                                                                                                                                                                                                                                                                                                                                                                                                                                                                                                                                                |                                | Fold Change (log2)              | p-value     | p-value (BH adj.) |
| 151,112569  | HMDB0003450, HMDB0003634, HMDB0003667, HMDB0003892, HMDB0003893, HMDB001854, HMDB0032120, HMDB0032242, HMDB0032536, HMDB0034715, HMDB0034916, HMDB0034973, HMDB0034974, HMDB0034975, HMDB0034985, HMDB0035054, HMDB0035077, HMDB0035078, HMDB0035092, HMDB0035100, HMDB0035120, HMDB0035125, HMDB0035158, HMDB0035203, HMDB0035241, HMDB0035277, HMDB0035280, HMDB0035600, HMDB0035604, HMDB0035622, HMDB0035656, HMDB0035706, HMDB0035737, HMDB0035738, HMDB0035741, HMDB0035743, HMDB0035744, HMDB0036079, HMDB0036080, HMDB0036082, HMDB0036083, HMDB0036085, HMDB0036087, HMDB0036088, HMDB0036113, HMDB0036114, HMDB0036115, HMDB0036127, HMDB0036128, HMDB0036129, HMDB0036598, HMDB0037008, HMDB0037009, HMDB0037010, HMDB0037015, HMDB0037017, HMDB0037024, HMDB0037025, HMDB0037172, HMDB0037280, HMDB0037302, HMDB0037303, HMDB0038251, HMDB0038290, HMDB0038557, HMDB0039008, HMDB0039816, HMDB0040766, HMDB0041011, HMDB0041013, HMDB0041631, HMDB0059608, HMDB0059761, HMDB0059827, HMDB0059838, HMDB0059875, HMDB0059885, HMDB0061794, HMDB03450, HMDB03634, HMDB03667, HMDB06291, HMDB06410, HMDB30892, HMDB30893, HMDB31854, HMDB32120, HMDB32242, HMDB32536, HMDB34715, HMDB34916, HMDB34973, HMDB34974, HMDB34975, HMDB34985, HMDB35054, HMDB35077, HMDB35078, HMDB35092, HMDB35100, HMDB35120, HMDB35125, HMDB35158, HMDB35203, HMDB35241, HMDB35277, HMDB35280, HMDB35600, HMDB35604, HMDB35622, HMDB35656, HMDB35706, HMDB35737, HMDB35738, HMDB35741, HMDB35743, HMDB35744, HMDB36044, HMDB36079, HMDB36080, HMDB36082, HMDB36083, HMDB36085, HMDB36087, HMDB36088, HMDB36113, HMDB36114, HMDB36115, HMDB36127, HMDB36128, HMDB36129, HMDB36598, HMDB37008, HMDB37009, HMDB37010, HMDB37015, HMDB37017, HMDB37024, HMDB37025, HMDB37172, HMDB37280, HMDB37302, HMDB37303, HMDB38251, HMDB38290, HMDB38557, HMDB39008, HMDB39816, HMDB40766, HMDB41011, HMDB41013, HMDB41631, HMDB59608, HMDB59761, HMDB59827, HMDB59838, HMDB59875, HMDB59885, HMDB61794 | (-)-trans-Carveol              | -0,904351166                    | 0,001318972 | 0,014218788       |
| 152,0344082 | HMDB0001476, HMDB0001972, HMDB0014378, HMDB0014389, HMDB0059749, HMDB0059811, HMDB01476, HMDB01972, HMDB14378, HMDB14389, HMDB59749, HMDB59811                                                                                                                                                                                                                                                                                                                                                                                                                                                                                                                                                                                                                                                                                                                                                                                                                                                                                                                                                                                                                                                                                                                                                                                                                                                                                                                                                                                                                                                                                                                                                                                                                                                                                                                                                                                                                                 | 3-Hydroxyanthranilic acid      | -0,145583013                    | 0,113191538 | 0,304638953       |
| 152,0715673 | HMDB0000073, HMDB0004825, HMDB00073, HMDB0012309, HMDB04825, HMDB12309                                                                                                                                                                                                                                                                                                                                                                                                                                                                                                                                                                                                                                                                                                                                                                                                                                                                                                                                                                                                                                                                                                                                                                                                                                                                                                                                                                                                                                                                                                                                                                                                                                                                                                                                                                                                                                                                                                         | Dopamine                       | -0,020905806                    | 0,54050746  | 0,751710534       |
| 153,0023388 | HMDB0040002, HMDB40002                                                                                                                                                                                                                                                                                                                                                                                                                                                                                                                                                                                                                                                                                                                                                                                                                                                                                                                                                                                                                                                                                                                                                                                                                                                                                                                                                                                                                                                                                                                                                                                                                                                                                                                                                                                                                                                                                                                                                         | 1-(2-Thienyl)-1,2-propanedione | 0,169505945                     | 0,09274532  | 0,268684116       |
| 153,0192513 | HMDB0000152, HMDB0000397, HMDB0001856, HMDB0013676, HMDB0013677, HMDB00152, HMDB0029666, HMDB0034299, HMDB00397, HMDB0125090, HMDB01856, HMDB13676, HMDB13677, HMDB29666, HMDB34299                                                                                                                                                                                                                                                                                                                                                                                                                                                                                                                                                                                                                                                                                                                                                                                                                                                                                                                                                                                                                                                                                                                                                                                                                                                                                                                                                                                                                                                                                                                                                                                                                                                                                                                                                                                            | Genitic acid                   | 0,948384877                     | 0,062385523 | 0,204664919       |
| 153,0536465 | HMDB0005784, HMDB0030570, HMDB0032012, HMDB0034158, HMDB0037724, HMDB0037728, HMDB0059966, HMDB0125534, HMDB0126617, HMDB0131231, HMDB0131232, HMDB0131479, HMDB0135785, HMDB05784, HMDB30570, HMDB32012, HMDB34158, HMDB37724, HMDB37728, HMDB59966                                                                                                                                                                                                                                                                                                                                                                                                                                                                                                                                                                                                                                                                                                                                                                                                                                                                                                                                                                                                                                                                                                                                                                                                                                                                                                                                                                                                                                                                                                                                                                                                                                                                                                                           | Hydroxytyrosol                 | 0,402203893                     | 0,074183321 | 0,226181313       |
| 153,0701389 | HMDB0034437, HMDB0034968, HMDB34437, HMDB34968                                                                                                                                                                                                                                                                                                                                                                                                                                                                                                                                                                                                                                                                                                                                                                                                                                                                                                                                                                                                                                                                                                                                                                                                                                                                                                                                                                                                                                                                                                                                                                                                                                                                                                                                                                                                                                                                                                                                 | Biphenyl                       | 0,266521233                     | 0,182201505 | 0,417740595       |
| 153,0919602 | HMDB0031302, HMDB0032314, HMDB0032442, HMDB0035135, HMDB0036177, HMDB0036239, HMDB0037276, HMDB0038268, HMDB0038697, HMDB0040285, HMDB0060285, HMDB31302, HMDB32314, HMDB32442, HMDB35135, HMDB36177, HMDB36239, HMDB37276, HMDB38268, HMDB38697, HMDB40285, HMDB60285                                                                                                                                                                                                                                                                                                                                                                                                                                                                                                                                                                                                                                                                                                                                                                                                                                                                                                                                                                                                                                                                                                                                                                                                                                                                                                                                                                                                                                                                                                                                                                                                                                                                                                         | C9:2                           | 0,166996273                     | 0,309721081 | 0,569306197       |
| 154,0615445 | HMDB0000177, HMDB00177, HMDB0034267, HMDB03412, HMDB34267                                                                                                                                                                                                                                                                                                                                                                                                                                                                                                                                                                                                                                                                                                                                                                                                                                                                                                                                                                                                                                                                                                                                                                                                                                                                                                                                                                                                                                                                                                                                                                                                                                                                                                                                                                                                                                                                                                                      | Histidine                      | -0,05381822                     | 0,355652063 | 0,614116037       |
| 154,9859044 | HMDB0041066, HMDB41066                                                                                                                                                                                                                                                                                                                                                                                                                                                                                                                                                                                                                                                                                                                                                                                                                                                                                                                                                                                                                                                                                                                                                                                                                                                                                                                                                                                                                                                                                                                                                                                                                                                                                                                                                                                                                                                                                                                                                         | S-Propyl thiosulfate           | 0,077830931                     | 0,88833261  | 0,954337611       |
| 154,9987004 | HMDB0004812, HMDB00578, HMDB04812                                                                                                                                                                                                                                                                                                                                                                                                                                                                                                                                                                                                                                                                                                                                                                                                                                                                                                                                                                                                                                                                                                                                                                                                                                                                                                                                                                                                                                                                                                                                                                                                                                                                                                                                                                                                                                                                                                                                              | 2,5-Furandicarboxylic acid     | 0,050536626                     | 0,353337416 | 0,612545182       |
| 154,9987004 | HMDB0040939, HMDB40939                                                                                                                                                                                                                                                                                                                                                                                                                                                                                                                                                                                                                                                                                                                                                                                                                                                                                                                                                                                                                                                                                                                                                                                                                                                                                                                                                                                                                                                                                                                                                                                                                                                                                                                                                                                                                                                                                                                                                         | Methyl phenyl disulfide        | 0,050536626                     | 0,353337416 | 0,612545182       |
| 155,0460469 | HMDB0000544, HMDB0001014, HMDB0002320, HMDB00544, HMDB01014, HMDB02320                                                                                                                                                                                                                                                                                                                                                                                                                                                                                                                                                                                                                                                                                                                                                                                                                                                                                                                                                                                                                                                                                                                                                                                                                                                                                                                                                                                                                                                                                                                                                                                                                                                                                                                                                                                                                                                                                                         | 5-Hydroxymethyl-4-methyluracil | 0,066714501                     | 0,244916657 | 0,499562978       |
| 155,1074225 | HMDB0004362, HMDB0031263, HMDB0031271, HMDB0031514, HMDB0031531, HMDB0032265, HMDB0032307, HMDB0032413, HMDB0032491, HMDB0033167, HMDB0034716, HMDB0035307, HMDB0036208, HMDB0036222, HMDB0037023, HMDB0037496, HMDB0037618, HMDB0037629, HMDB0038272, HMDB0038275, HMDB0039736, HMDB0039794, HMDB0040210, HMDB0059728, HMDB0059817, HMDB0059840, HMDB0059894, HMDB0060286, HMDB04362, HMDB31263, HMDB31271, HMDB31514, HMDB31531, HMDB32265, HMDB32307, HMDB32413, HMDB32491, HMDB33167, HMDB34716, HMDB35307, HMDB36208, HMDB36222, HMDB37023, HMDB37496, HMDB37618, HMDB37629, HMDB38272, HMDB38275, HMDB39736, HMDB39794, HMDB40210, HMDB59728, HMDB59817, HMDB59840, HMDB59894, HMDB60286                                                                                                                                                                                                                                                                                                                                                                                                                                                                                                                                                                                                                                                                                                                                                                                                                                                                                                                                                                                                                                                                                                                                                                                                                                                                                 | C9:1                           | 0,024866471                     | 0,227786351 | 0,474056558       |
| 156,044297  | HMDB0062189, HMDB62189                                                                                                                                                                                                                                                                                                                                                                                                                                                                                                                                                                                                                                                                                                                                                                                                                                                                                                                                                                                                                                                                                                                                                                                                                                                                                                                                                                                                                                                                                                                                                                                                                                                                                                                                                                                                                                                                                                                                                         | 1-nitrosonaphthalene           | 0,081304441                     | 0,383912341 | 0,636331303       |
| 156,1028434 | HMDB0014447, HMDB0033433, HMDB14447, HMDB33433                                                                                                                                                                                                                                                                                                                                                                                                                                                                                                                                                                                                                                                                                                                                                                                                                                                                                                                                                                                                                                                                                                                                                                                                                                                                                                                                                                                                                                                                                                                                                                                                                                                                                                                                                                                                                                                                                                                                 | Tranexamic Acid                | 0,003921891                     | 0,553671811 | 0,757470764       |
| 157,0127245 | HMDB0031210, HMDB0037759, HMDB0060348, HMDB0137818, HMDB31210, HMDB37759, HMDB60348                                                                                                                                                                                                                                                                                                                                                                                                                                                                                                                                                                                                                                                                                                                                                                                                                                                                                                                                                                                                                                                                                                                                                                                                                                                                                                                                                                                                                                                                                                                                                                                                                                                                                                                                                                                                                                                                                            | Zymonic acid                   | 0,080367449                     | 0,960065526 | 0,98375692        |
| 157,0499276 | HMDB0000635, HMDB0012241, HMDB0036380, HMDB0059815, HMDB00635, HMDB12241, HMDB36380, HMDB59815                                                                                                                                                                                                                                                                                                                                                                                                                                                                                                                                                                                                                                                                                                                                                                                                                                                                                                                                                                                                                                                                                                                                                                                                                                                                                                                                                                                                                                                                                                                                                                                                                                                                                                                                                                                                                                                                                 | Isopropylmaleate               | -0,040869816                    | 0,282474831 | 0,546386287       |
| 157,0867424 | HMDB0000451, HMDB0000909, HMDB0010721, HMDB0013211, HMDB0030303, HMDB0031177, HMDB0031307, HMDB0036230, HMDB0036395, HMDB0038305, HMDB0040447, HMDB0041616, HMDB00451, HMDB0059938, HMDB0059939, HMDB0060683, HMDB0060685, HMDB0062788, HMDB00909, HMDB10721, HMDB13211, HMDB30303, HMDB31177, HMDB31307, HMDB36230, HMDB36395, HMDB38305, HMDB40447, HMDB41616, HMDB59938, HMDB59939, HMDB60683, HMDB60685, HMDB62788                                                                                                                                                                                                                                                                                                                                                                                                                                                                                                                                                                                                                                                                                                                                                                                                                                                                                                                                                                                                                                                                                                                                                                                                                                                                                                                                                                                                                                                                                                                                                         | cis-4-Hydroxycyclohexylacetate | -0,02997644                     | 0,636015992 | 0,801639866       |

Supplementary Appendix  
MIRA Study

| m/z         | HMDB ID alternatives                                                                                                                                                                                                                                                                                                                                                                                                                                                                                                                                                                                                                                                                                                                                                                                                                                         | Suggested annotation                        | Comparison [vegan] - [omnivore] |             |                   |
|-------------|--------------------------------------------------------------------------------------------------------------------------------------------------------------------------------------------------------------------------------------------------------------------------------------------------------------------------------------------------------------------------------------------------------------------------------------------------------------------------------------------------------------------------------------------------------------------------------------------------------------------------------------------------------------------------------------------------------------------------------------------------------------------------------------------------------------------------------------------------------------|---------------------------------------------|---------------------------------|-------------|-------------------|
|             |                                                                                                                                                                                                                                                                                                                                                                                                                                                                                                                                                                                                                                                                                                                                                                                                                                                              |                                             | Fold Change (log2)              | p-value     | p-value (BH adj.) |
| 157,1231227 | HMDB0000798, HMDB0000847, HMDB00030331, HMDB00031291, HMDB00031480, HMDB00031557, HMDB00032042, HMDB00032309, HMDB00032406, HMDB00032454, HMDB00034162, HMDB00034165, HMDB00034606, HMDB00036234, HMDB00037143, HMDB00037164, HMDB00037288, HMDB00038040, HMDB00038603, HMDB00039216, HMDB00039219, HMDB0040221, HMDB0040295, HMDB0040430, HMDB0059822, HMDB00798, HMDB00847, HMDB30331, HMDB31291, HMDB31480, HMDB31557, HMDB32042, HMDB32309, HMDB32406, HMDB32454, HMDB34162, HMDB34165, HMDB34606, HMDB36234, HMDB37143, HMDB37164, HMDB37288, HMDB38040, HMDB38603, HMDB39216, HMDB39219, HMDB40221, HMDB40295, HMDB40430, HMDB59822                                                                                                                                                                                                                    | Oenanthic ether                             | -0,135756941                    | 0,218925646 | 0,469049541       |
| 158,0605072 | HMDB0001190, HMDB0062503, HMDB01190, HMDB62503                                                                                                                                                                                                                                                                                                                                                                                                                                                                                                                                                                                                                                                                                                                                                                                                               | Indoleacetaldehyde                          | -0,150058796                    | 0,030957982 | 0,135509021       |
| 158,0812467 | HMDB0000339, HMDB0000678, HMDB0000927, HMDB0011757, HMDB0012154, HMDB0012175, HMDB0029230, HMDB0029409, HMDB0029412, HMDB0031345, HMDB00339, HMDB0036384, HMDB0038593, HMDB0038625, HMDB0061678, HMDB00678, HMDB00927, HMDB11757, HMDB12154, HMDB12175, HMDB29230, HMDB29409, HMDB29412, HMDB31345, HMDB36384, HMDB38593, HMDB38625, HMDB61678                                                                                                                                                                                                                                                                                                                                                                                                                                                                                                               | 2-Methylbutyrylglycine                      | -0,045615604                    | 0,425137366 | 0,664649654       |
| 158,9954464 | HMDB0036807, HMDB0040199, HMDB36807, HMDB40199                                                                                                                                                                                                                                                                                                                                                                                                                                                                                                                                                                                                                                                                                                                                                                                                               | (2-Furanylmethyl) methyl disulfide          | 0,025697484                     | 0,907718462 | 0,961999186       |
| 159,0297876 | HMDB0000225, HMDB0000398, HMDB00225, HMDB0039447, HMDB00398, HMDB0059737, HMDB39447, HMDB59737                                                                                                                                                                                                                                                                                                                                                                                                                                                                                                                                                                                                                                                                                                                                                               | Oxoadipate                                  | 0,02011578                      | 0,855049701 | 0,93241486        |
| 159,045073  | HMDB0032394, HMDB0036073, HMDB0041009, HMDB0060497, HMDB32394, HMDB36073, HMDB41009, HMDB60497                                                                                                                                                                                                                                                                                                                                                                                                                                                                                                                                                                                                                                                                                                                                                               | 6-Methylcoumarin                            | -0,085206303                    | 0,066610571 | 0,214186619       |
| 159,1023793 | HMDB0000486, HMDB0000711, HMDB0001954, HMDB0002264, HMDB0010722, HMDB0013898, HMDB0013899, HMDB0013900, HMDB0031509, HMDB0032270, HMDB0032827, HMDB00486, HMDB0059825, HMDB0059867, HMDB0062596, HMDB00711, HMDB01954, HMDB02264, HMDB10722, HMDB13898, HMDB13899, HMDB13900, HMDB31509, HMDB32270, HMDB32827, HMDB59825, HMDB59867, HMDB62596                                                                                                                                                                                                                                                                                                                                                                                                                                                                                                               | Propylhydroxypentanoic acid                 | 0,026298056                     | 0,804089587 | 0,904082001       |
| 159,1131942 | HMDB0002038, HMDB0006009, HMDB02038, HMDB06009                                                                                                                                                                                                                                                                                                                                                                                                                                                                                                                                                                                                                                                                                                                                                                                                               | Methyl-Lys                                  | -0,325329917                    | 0,895355317 | 0,95680127        |
| 160,040349  | HMDB0002285, HMDB0003320, HMDB0004077, HMDB0031172, HMDB0060289, HMDB02285, HMDB03320, HMDB04077, HMDB31172, HMDB60289                                                                                                                                                                                                                                                                                                                                                                                                                                                                                                                                                                                                                                                                                                                                       | 2-Indolecarboxylic acid                     | -0,07365655                     | 0,743137046 | 0,87098858        |
| 160,0608929 | HMDB0000510, HMDB0029423, HMDB0033747, HMDB00510, HMDB0061715, HMDB0062557, HMDB0062660, HMDB0094716, HMDB29423, HMDB33747, HMDB61715, HMDB62557, HMDB62660, HMDB94716                                                                                                                                                                                                                                                                                                                                                                                                                                                                                                                                                                                                                                                                                       | Aminoadipate                                | 0,127889407                     | 0,095364226 | 0,271586644       |
| 161,0449024 | HMDB0000321, HMDB0000345, HMDB0000355, HMDB0000368, HMDB0000640, HMDB0029934, HMDB00321, HMDB0032873, HMDB00345, HMDB00355, HMDB00368, HMDB0041561, HMDB0059758, HMDB00640, HMDB29934, HMDB32873, HMDB41561, HMDB59758                                                                                                                                                                                                                                                                                                                                                                                                                                                                                                                                                                                                                                       | Hydroxyadipate                              | 0,002783773                     | 0,095130264 | 0,271586644       |
| 161,9872469 | HMDB0033585, HMDB33585                                                                                                                                                                                                                                                                                                                                                                                                                                                                                                                                                                                                                                                                                                                                                                                                                                       | Acesulfame                                  | -0,443045846                    | 0,283025412 | 0,546386287       |
| 162,0936515 | HMDB0039661, HMDB0040015, HMDB0040022, HMDB0040023, HMDB0040024, HMDB0040025, HMDB0040026, HMDB0041927, HMDB0061786, HMDB39661, HMDB40015, HMDB40022, HMDB40023, HMDB40024, HMDB40025, HMDB40026, HMDB41927, HMDB61786                                                                                                                                                                                                                                                                                                                                                                                                                                                                                                                                                                                                                                       | (R)-2-Methylimino-1-phenylpropan-1-ol       | 0,300719246                     | 0,285659016 | 0,547460795       |
| 163,0606688 | HMDB0000174, HMDB0000849, HMDB0002712, HMDB0003081, HMDB0005876, HMDB0010207, HMDB0012327, HMDB00174, HMDB0029196, HMDB0033821, HMDB0059624, HMDB0059625, HMDB0060267, HMDB0062477, HMDB0062489, HMDB00849, HMDB0124735, HMDB02712, HMDB03081, HMDB05876, HMDB10207, HMDB11726, HMDB11736, HMDB12327, HMDB29196, HMDB33821, HMDB59624, HMDB59625, HMDB60267, HMDB62477, HMDB62489                                                                                                                                                                                                                                                                                                                                                                                                                                                                            | Deoxyhexose                                 | 0,199994844                     | 0,450667835 | 0,684638244       |
| 163,1123299 | HMDB0029653, HMDB0031311, HMDB0031454, HMDB0031624, HMDB0031625, HMDB0031866, HMDB0032060, HMDB0035601, HMDB0035989, HMDB0036719, HMDB0036814, HMDB0036816, HMDB0037294, HMDB29653, HMDB31311, HMDB31454, HMDB31624, HMDB31625, HMDB31866, HMDB32060, HMDB35601, HMDB35989, HMDB36719, HMDB36814, HMDB36816, HMDB37294                                                                                                                                                                                                                                                                                                                                                                                                                                                                                                                                       | 1-(1-Methoxy-1-methylethyl)-4-methylbenzene | -0,138098765                    | 0,344969609 | 0,604043171       |
| 164,0711161 | HMDB0000159, HMDB0001007, HMDB0004992, HMDB0006044, HMDB00159, HMDB0033485, HMDB0033589, HMDB0034169, HMDB0059934, HMDB00612, HMDB0062402, HMDB0062407, HMDB01007, HMDB04992, HMDB06044, HMDB33485, HMDB33589, HMDB34169, HMDB59934, HMDB62402, HMDB62407                                                                                                                                                                                                                                                                                                                                                                                                                                                                                                                                                                                                    | Phenylalanine                               | -0,180543713                    | 0,04089127  | 0,162818208       |
| 165,0195685 | HMDB0002107, HMDB0002334, HMDB0002428, HMDB0032613, HMDB02107, HMDB02334, HMDB02428, HMDB32613                                                                                                                                                                                                                                                                                                                                                                                                                                                                                                                                                                                                                                                                                                                                                               | Phthalate                                   | -0,042652168                    | 0,993228403 | 0,995511687       |
| 165,0402935 | HMDB0000539, HMDB0000867, HMDB00539, HMDB0059750, HMDB0060255, HMDB0060256, HMDB00867, HMDB59750, HMDB60255, HMDB60256                                                                                                                                                                                                                                                                                                                                                                                                                                                                                                                                                                                                                                                                                                                                       | Pentonic acid                               | -0,128580608                    | 0,303767199 | 0,563585101       |
| 165,0554557 | HMDB0000375, HMDB0000563, HMDB0000748, HMDB0000779, HMDB0002072, HMDB0002199, HMDB0002229, HMDB0005175, HMDB0029665, HMDB0029817, HMDB0031132, HMDB0032030, HMDB0032138, HMDB0032573, HMDB0032605, HMDB0032639, HMDB0033752, HMDB0034243, HMDB0034993, HMDB00375, HMDB0040645, HMDB0041611, HMDB0041683, HMDB00475, HMDB00563, HMDB0059969, HMDB0062348, HMDB0062590, HMDB00748, HMDB00779, HMDB0124925, HMDB0125519, HMDB0125525, HMDB0125539, HMDB0134032, HMDB0134033, HMDB0134034, HMDB0134035, HMDB0134036, HMDB0134037, HMDB0134038, HMDB0137472, HMDB0141765, HMDB0141766, HMDB0142136, HMDB0142137, HMDB02072, HMDB02199, HMDB02229, HMDB05175, HMDB29665, HMDB29817, HMDB31132, HMDB32030, HMDB32138, HMDB32573, HMDB32605, HMDB32639, HMDB33752, HMDB34243, HMDB34993, HMDB40645, HMDB41611, HMDB41683, HMDB59969, HMDB61145, HMDB62348, HMDB62590 | 3-(3-Hydroxyphenyl)propano acid             | 0,144018715                     | 0,394742839 | 0,641527233       |
| 165,0744256 | HMDB0038183, HMDB38183                                                                                                                                                                                                                                                                                                                                                                                                                                                                                                                                                                                                                                                                                                                                                                                                                                       | 3-(4-Methyl-3-pentenyl)thiophene            | -0,080806516                    | 0,193827551 | 0,434492608       |

Supplementary Appendix  
MIRA Study

| m/z         | HMDB ID alternatives                                                                                                                                                                                                                                                                                                                                                                                                                                                                                                                                                                                                                                                                                                                                                                                                                                                                                                                                                                                                                                                                                                                                                                                                              | Suggested annotation        | Comparison [vegan] - [omnivore] |             |                   |
|-------------|-----------------------------------------------------------------------------------------------------------------------------------------------------------------------------------------------------------------------------------------------------------------------------------------------------------------------------------------------------------------------------------------------------------------------------------------------------------------------------------------------------------------------------------------------------------------------------------------------------------------------------------------------------------------------------------------------------------------------------------------------------------------------------------------------------------------------------------------------------------------------------------------------------------------------------------------------------------------------------------------------------------------------------------------------------------------------------------------------------------------------------------------------------------------------------------------------------------------------------------|-----------------------------|---------------------------------|-------------|-------------------|
|             |                                                                                                                                                                                                                                                                                                                                                                                                                                                                                                                                                                                                                                                                                                                                                                                                                                                                                                                                                                                                                                                                                                                                                                                                                                   |                             | Fold Change (log2)              | p-value     | p-value (BH adj.) |
| 165,0916573 | HMDB0004586, HMDB0029691, HMDB0001085, HMDB00032062, HMDB00032135, HMDB0032462, HMDB00032615, HMDB00034922, HMDB00035063, HMDB0035235, HMDB00035328, HMDB0036042, HMDB00036084, HMDB0036878, HMDB0036879, HMDB0037011, HMDB0037012, HMDB0037044, HMDB0039382, HMDB0040176, HMDB0041000, HMDB0041584, HMDB0062603, HMDB0127496, HMDB0135742, HMDB04586, HMDB06639, HMDB29691, HMDB31085, HMDB32062, HMDB32135, HMDB32462, HMDB32615, HMDB34922, HMDB35063, HMDB35235, HMDB35328, HMDB36042, HMDB36084, HMDB36878, HMDB36879, HMDB37011, HMDB37012, HMDB37044, HMDB39382, HMDB40176, HMDB41000, HMDB41584, HMDB62603                                                                                                                                                                                                                                                                                                                                                                                                                                                                                                                                                                                                                | C10:3                       | 1,321494117                     | 0,002584963 | 0,02284884        |
| 165,9785589 | HMDB0005024, HMDB30524                                                                                                                                                                                                                                                                                                                                                                                                                                                                                                                                                                                                                                                                                                                                                                                                                                                                                                                                                                                                                                                                                                                                                                                                            | 2(3H)-Benzothiazolethione   | -0,708087686                    | 0,094916778 | 0,271586644       |
| 166,0644888 | HMDB0029873, HMDB0060362, HMDB29873, HMDB60362                                                                                                                                                                                                                                                                                                                                                                                                                                                                                                                                                                                                                                                                                                                                                                                                                                                                                                                                                                                                                                                                                                                                                                                    | (S)-Spinacine               | -0,100797723                    | 0,034791216 | 0,146086702       |
| 167,0212665 | HMDB0000289, HMDB00289                                                                                                                                                                                                                                                                                                                                                                                                                                                                                                                                                                                                                                                                                                                                                                                                                                                                                                                                                                                                                                                                                                                                                                                                            | Urate                       | 0,236160953                     | 0,177254038 | 0,413276794       |
| 167,1068623 | HMDB0013105, HMDB0031156, HMDB00031273, HMDB0032219, HMDB0032312, HMDB0032313, HMDB0032319, HMDB0032434, HMDB0033700, HMDB0034452, HMDB0034670, HMDB0035714, HMDB0035766, HMDB0035829, HMDB0036067, HMDB0036103, HMDB0037014, HMDB0037175, HMDB0037821, HMDB0040639, HMDB13105, HMDB31156, HMDB31273, HMDB32219, HMDB32312, HMDB32313, HMDB32319, HMDB32434, HMDB33700, HMDB34452, HMDB34670, HMDB35714, HMDB35766, HMDB35829, HMDB36067, HMDB36103, HMDB37014, HMDB37175, HMDB37821, HMDB40639                                                                                                                                                                                                                                                                                                                                                                                                                                                                                                                                                                                                                                                                                                                                   | C10:2                       | 0,482848338                     | 0,054801105 | 0,191146254       |
| 168,0772616 | HMDB0000001, HMDB00001, HMDB0000479, HMDB00479, HMDB04935, HMDB06703, HMDB06704                                                                                                                                                                                                                                                                                                                                                                                                                                                                                                                                                                                                                                                                                                                                                                                                                                                                                                                                                                                                                                                                                                                                                   | Methyl-His                  | -1,335979666                    | 0,000101561 | 0,001689068       |
| 169,0646463 | HMDB0032412, HMDB0032582, HMDB0034446, HMDB32412, HMDB32582, HMDB34446                                                                                                                                                                                                                                                                                                                                                                                                                                                                                                                                                                                                                                                                                                                                                                                                                                                                                                                                                                                                                                                                                                                                                            | Methyl beta-naphthyl ketone | 0,028617066                     | 4,46484E-05 | 0,000889646       |
| 169,0854384 | HMDB0030471, HMDB0038276, HMDB30471, HMDB38276                                                                                                                                                                                                                                                                                                                                                                                                                                                                                                                                                                                                                                                                                                                                                                                                                                                                                                                                                                                                                                                                                                                                                                                    | 1,4-Ipomeadiol              | -0,111860751                    | 0,025424416 | 0,116156048       |
| 169,1229977 | HMDB0004980, HMDB0010726, HMDB0012183, HMDB0029358, HMDB0029859, HMDB0030031, HMDB0031002, HMDB0031003, HMDB0031297, HMDB0031362, HMDB0031440, HMDB0031441, HMDB0032119, HMDB0032275, HMDB0032393, HMDB0032452, HMDB0033203, HMDB0033377, HMDB0034427, HMDB0034581, HMDB0034880, HMDB0035122, HMDB0035365, HMDB0035837, HMDB0035839, HMDB0035907, HMDB0036211, HMDB0036990, HMDB0036992, HMDB0037021, HMDB0037116, HMDB0037217, HMDB0037497, HMDB0037632, HMDB0038744, HMDB0039149, HMDB0039768, HMDB0039795, HMDB0040194, HMDB0040208, HMDB0040213, HMDB0040330, HMDB0040530, HMDB0040726, HMDB0040727, HMDB0041012, HMDB0041630, HMDB0059610, HMDB0059852, HMDB04980, HMDB10726, HMDB12183, HMDB29358, HMDB29859, HMDB30031, HMDB31002, HMDB31003, HMDB31297, HMDB31362, HMDB31440, HMDB31441, HMDB32119, HMDB32275, HMDB32393, HMDB32452, HMDB33203, HMDB33377, HMDB34427, HMDB34581, HMDB34880, HMDB35122, HMDB35365, HMDB35837, HMDB35839, HMDB35907, HMDB36099, HMDB36211, HMDB36990, HMDB36992, HMDB37021, HMDB37116, HMDB37217, HMDB37497, HMDB37632, HMDB38744, HMDB39149, HMDB39768, HMDB39795, HMDB40194, HMDB40208, HMDB40213, HMDB40330, HMDB40530, HMDB40726, HMDB40727, HMDB41012, HMDB41630, HMDB59610, HMDB59852 | C10:1                       | -0,087011157                    | 0,606239377 | 0,776271273       |
| 170,0450396 | HMDB0012289, HMDB12289                                                                                                                                                                                                                                                                                                                                                                                                                                                                                                                                                                                                                                                                                                                                                                                                                                                                                                                                                                                                                                                                                                                                                                                                            | Tetrahydrodipicolinate      | 0,125926492                     | 0,008029133 | 0,052613508       |
| 170,0591349 | HMDB0015052, HMDB15052                                                                                                                                                                                                                                                                                                                                                                                                                                                                                                                                                                                                                                                                                                                                                                                                                                                                                                                                                                                                                                                                                                                                                                                                            | Metronidazole               | 0,160308353                     | 0,208137149 | 0,453738986       |
| 171,0440012 | HMDB0001892, HMDB0033765, HMDB01892, HMDB33765                                                                                                                                                                                                                                                                                                                                                                                                                                                                                                                                                                                                                                                                                                                                                                                                                                                                                                                                                                                                                                                                                                                                                                                    | Menadione                   | -0,270371629                    | 0,004525633 | 0,034020276       |
| 171,0773454 | HMDB0000721, HMDB0011178, HMDB00721, HMDB11178                                                                                                                                                                                                                                                                                                                                                                                                                                                                                                                                                                                                                                                                                                                                                                                                                                                                                                                                                                                                                                                                                                                                                                                    | Glycylproline               | -0,044904592                    | 0,027877542 | 0,124662648       |
| 171,1025185 | HMDB0036188, HMDB0036213, HMDB0036396, HMDB0040202, HMDB0040203, HMDB0059936, HMDB0059937, HMDB0060287, HMDB0094711, HMDB36188, HMDB36213, HMDB36396, HMDB40165, HMDB40202, HMDB40203, HMDB59936, HMDB59937, HMDB60287, HMDB94711                                                                                                                                                                                                                                                                                                                                                                                                                                                                                                                                                                                                                                                                                                                                                                                                                                                                                                                                                                                                 | Tetrahydrofurfuryl butyrate | 0,043967085                     | 0,220658923 | 0,470451297       |
| 171,1387627 | HMDB0000511, HMDB0029760, HMDB0030029, HMDB0031264, HMDB0031739, HMDB0032045, HMDB0032070, HMDB0032155, HMDB0032264, HMDB0032302, HMDB0032315, HMDB0033620, HMDB0034457, HMDB0034849, HMDB0035595, HMDB0035723, HMDB0036136, HMDB0036145, HMDB0036228, HMDB0037387, HMDB0037849, HMDB0038038, HMDB0038602, HMDB0038783, HMDB0039218, HMDB0040157, HMDB0040167, HMDB0040195, HMDB0040211, HMDB0040529, HMDB0041216, HMDB00511, HMDB0061805, HMDB0094654, HMDB29760, HMDB30029, HMDB31264, HMDB31739, HMDB32045, HMDB32070, HMDB32155, HMDB32264, HMDB32302, HMDB32315, HMDB33620, HMDB34457, HMDB34849, HMDB35595, HMDB35723, HMDB36136, HMDB36145, HMDB36228, HMDB37387, HMDB37849, HMDB38038, HMDB38602, HMDB38783, HMDB39218, HMDB40157, HMDB40167, HMDB40195, HMDB40211, HMDB40529, HMDB41216, HMDB61805, HMDB94654                                                                                                                                                                                                                                                                                                                                                                                                            | Decanoic acid (FA10:0)      | -0,849861907                    | 0,000429759 | 0,006044346       |
| 172,0392192 | HMDB0000842, HMDB0062188, HMDB00842, HMDB62188                                                                                                                                                                                                                                                                                                                                                                                                                                                                                                                                                                                                                                                                                                                                                                                                                                                                                                                                                                                                                                                                                                                                                                                    | 2-Quinolinecarboxylic acid  | 0,050427819                     | 0,43569191  | 0,675744189       |
| 172,0956431 | HMDB0000701, HMDB0000747, HMDB0002087, HMDB0011756, HMDB0061684, HMDB00701, HMDB00747, HMDB02087, HMDB11756, HMDB61684                                                                                                                                                                                                                                                                                                                                                                                                                                                                                                                                                                                                                                                                                                                                                                                                                                                                                                                                                                                                                                                                                                            | Acetyl-Leu                  | -0,175970606                    | 0,000787676 | 0,009539634       |
| 172,9913014 | HMDB0060015, HMDB60015                                                                                                                                                                                                                                                                                                                                                                                                                                                                                                                                                                                                                                                                                                                                                                                                                                                                                                                                                                                                                                                                                                                                                                                                            | Phenol sulfate              | 0,661931191                     | 0,105862292 | 0,294788907       |
| 173,0706256 | HMDB0006240, HMDB0029739, HMDB06240, HMDB29739                                                                                                                                                                                                                                                                                                                                                                                                                                                                                                                                                                                                                                                                                                                                                                                                                                                                                                                                                                                                                                                                                                                                                                                    | Indole-acetamide            | 0,302859366                     | 0,036765601 | 0,149114436       |
| 173,0810521 | HMDB0000893, HMDB0002023, HMDB0033838, HMDB0041606, HMDB0059727, HMDB0059757, HMDB0060684, HMDB00837, HMDB00893, HMDB02023, HMDB33838, HMDB41606, HMDB59727, HMDB59757, HMDB60684                                                                                                                                                                                                                                                                                                                                                                                                                                                                                                                                                                                                                                                                                                                                                                                                                                                                                                                                                                                                                                                 | Suberic acid                | 0,499222611                     | 0,093449354 | 0,268936755       |
| 173,0932306 | HMDB0003357, HMDB0028854, HMDB0029127, HMDB0034365, HMDB0062764, HMDB0094702, HMDB03357, HMDB06489, HMDB28854, HMDB29127, HMDB34365, HMDB62764, HMDB94702                                                                                                                                                                                                                                                                                                                                                                                                                                                                                                                                                                                                                                                                                                                                                                                                                                                                                                                                                                                                                                                                         | Acetylmornithine            | 1,314516877                     | 0,103130849 | 0,28916431        |
| 173,1037355 | HMDB0000517, HMDB0003416, HMDB00517, HMDB03416                                                                                                                                                                                                                                                                                                                                                                                                                                                                                                                                                                                                                                                                                                                                                                                                                                                                                                                                                                                                                                                                                                                                                                                    | Arginine                    | 0,359311726                     | 0,031080051 | 0,135509021       |
| 174,088235  | HMDB0000904, HMDB0003148, HMDB00904, HMDB03148                                                                                                                                                                                                                                                                                                                                                                                                                                                                                                                                                                                                                                                                                                                                                                                                                                                                                                                                                                                                                                                                                                                                                                                    | Citrulline                  | 0,001437825                     | 0,501885316 | 0,722211629       |
| 175,0247241 | HMDB0000044, HMDB00044, HMDB0006355, HMDB0031193, HMDB06355, HMDB14273, HMDB29945, HMDB31193                                                                                                                                                                                                                                                                                                                                                                                                                                                                                                                                                                                                                                                                                                                                                                                                                                                                                                                                                                                                                                                                                                                                      | Hexuronic acid, Ascorbate   | 0,256942481                     | 0,249244669 | 0,503707162       |

Supplementary Appendix  
MIRA Study

| m/z         | HMDB ID alternatives                                                                                                                                                                                                                                                                                                                                                                                                                                                                                                                                                                                                                                                                                                                                                                                                                     | Suggested annotation                        | Comparison [vegan] - [omnivore] |             |                   |
|-------------|------------------------------------------------------------------------------------------------------------------------------------------------------------------------------------------------------------------------------------------------------------------------------------------------------------------------------------------------------------------------------------------------------------------------------------------------------------------------------------------------------------------------------------------------------------------------------------------------------------------------------------------------------------------------------------------------------------------------------------------------------------------------------------------------------------------------------------------|---------------------------------------------|---------------------------------|-------------|-------------------|
|             |                                                                                                                                                                                                                                                                                                                                                                                                                                                                                                                                                                                                                                                                                                                                                                                                                                          |                                             | Fold Change (log2)              | p-value     | p-value (BH adj.) |
| 176.0691789 | HMDB0012271, HMDB12271                                                                                                                                                                                                                                                                                                                                                                                                                                                                                                                                                                                                                                                                                                                                                                                                                   | O-Ureidohomoserine                          | -0.115243146                    | 7,96159E-05 | 0.001416321       |
| 177.0547631 | HMDB0002040, HMDB0003903, HMDB00031055, HMDB00033248, HMDB00038712, HMDB00038965, HMDB00039471, HMDB0062273, HMDB0062729, HMDB0125103, HMDB0125518, HMDB0131168, HMDB0133457, HMDB0133611, HMDB0133612, HMDB0133613, HMDB0133614, HMDB0133615, HMDB0134055, HMDB0135647, HMDB0135649, HMDB0135650, HMDB0135651, HMDB0141076, HMDB0141077, HMDB0141078, HMDB0141782, HMDB020240, HMDB03903, HMDB031055, HMDB033248, HMDB038712, HMDB038965, HMDB039471, HMDB062273, HMDB062729                                                                                                                                                                                                                                                                                                                                                            | 4-Methoxycinnamic acid                      | 0.064574967                     | 7,23934E-07 | 3,32248E-05       |
| 177.0916459 | HMDB0002043, HMDB00031250, HMDB00031864, HMDB00033376, HMDB00033386, HMDB00033597, HMDB00035013, HMDB00036235, HMDB00036385, HMDB00037680, HMDB00037708, HMDB00038179, HMDB00040287, HMDB00040356, HMDB00040411, HMDB00040425, HMDB00040426, HMDB00040583, HMDB00040800, HMDB00041553, HMDB0126149, HMDB0126449, HMDB0132981, HMDB0133181, HMDB0133469, HMDB0133682, HMDB0133683, HMDB0133684, HMDB0133685, HMDB0133686, HMDB0133687, HMDB020243, HMDB31250, HMDB31864, HMDB33376, HMDB33386, HMDB33597, HMDB335013, HMDB336235, HMDB336385, HMDB33680, HMDB33708, HMDB338179, HMDB340287, HMDB40356, HMDB40411, HMDB40425, HMDB40426, HMDB40583, HMDB40800, HMDB41553                                                                                                                                                                   | 5-Phenylvaleric acid                        | 0.014786403                     | 0,027716248 | 0,12458025        |
| 178.0511175 | HMDB0000714, HMDB0000992, HMDB0012884, HMDB00032398, HMDB00032595, HMDB00714, HMDB00992, HMDB12884, HMDB32398, HMDB32595                                                                                                                                                                                                                                                                                                                                                                                                                                                                                                                                                                                                                                                                                                                 | Hippurate                                   | -1,04246293                     | 0,068806654 | 0,21505162        |
| 179.0556448 | HMDB0000122, HMDB0000143, HMDB0000169, HMDB0000211, HMDB0000346, HMDB0000516, HMDB0000660, HMDB0001151, HMDB0001266, HMDB0003345, HMDB0003418, HMDB0003449, HMDB0006088, HMDB00122, HMDB0012326, HMDB00143, HMDB00160, HMDB00169, HMDB00211, HMDB0032222, HMDB0033704, HMDB0034220, HMDB00346, HMDB00516, HMDB0061922, HMDB0062138, HMDB0062170, HMDB0062202, HMDB0062473, HMDB0062538, HMDB00660, HMDB01151, HMDB0125599, HMDB01266, HMDB02256, HMDB0240207, HMDB0240208, HMDB0240209, HMDB0240210, HMDB0240211, HMDB03340, HMDB03345, HMDB03418, HMDB03449, HMDB05762, HMDB06088, HMDB06564, HMDB12326, HMDB32222, HMDB33704, HMDB34220, HMDB61922, HMDB62138, HMDB62170, HMDB62202, HMDB62473, HMDB62538                                                                                                                              | Hexose                                      | -0.041074698                    | 0,008653188 | 0,055077223       |
| 180.0657557 | HMDB0000158, HMDB0001119, HMDB0002184, HMDB0003831, HMDB0006050, HMDB00158, HMDB0059720, HMDB0060280, HMDB00647, HMDB01119, HMDB02184, HMDB03831, HMDB06050, HMDB59720, HMDB60280                                                                                                                                                                                                                                                                                                                                                                                                                                                                                                                                                                                                                                                        | Tyrosine                                    | 0,019402295                     | 0,801187799 | 0,902630182       |
| 181.0504741 | HMDB0000118, HMDB0000333, HMDB0000423, HMDB0000755, HMDB0002643, HMDB0004061, HMDB00118, HMDB0029232, HMDB0029273, HMDB0029646, HMDB00333, HMDB0033624, HMDB0037274, HMDB0041270, HMDB00423, HMDB0059763, HMDB0062595, HMDB00755, HMDB0124923, HMDB0125533, HMDB0125591, HMDB0125595, HMDB0126386, HMDB0127495, HMDB0129348, HMDB0131428, HMDB0133494, HMDB0133788, HMDB0134042, HMDB0134043, HMDB0140294, HMDB0140892, HMDB02643, HMDB04061, HMDB04285, HMDB06776, HMDB29232, HMDB29273, HMDB29646, HMDB33624, HMDB37274, HMDB41270, HMDB59763, HMDB62595                                                                                                                                                                                                                                                                               | Homovanillic acid                           | 0,081088144                     | 0,076135332 | 0,231324074       |
| 181.9913406 | HMDB0029723, HMDB29723                                                                                                                                                                                                                                                                                                                                                                                                                                                                                                                                                                                                                                                                                                                                                                                                                   | Saccharin                                   | 0,077056981                     | 0,848655255 | 0,92735261        |
| 182.0454679 | HMDB0000017, HMDB00017                                                                                                                                                                                                                                                                                                                                                                                                                                                                                                                                                                                                                                                                                                                                                                                                                   | 4-Pyridoxate                                | 1,23886686                      | 0,029295732 | 0,129674511       |
| 182.0707159 | HMDB0033141, HMDB33141                                                                                                                                                                                                                                                                                                                                                                                                                                                                                                                                                                                                                                                                                                                                                                                                                   | 2-Amino-a-carboline                         | 0,386493321                     | 0,062250916 | 0,204664919       |
| 183.0484016 | HMDB0032401, HMDB32401                                                                                                                                                                                                                                                                                                                                                                                                                                                                                                                                                                                                                                                                                                                                                                                                                   | (+/-)-3-[(2-methyl-3-furyl)thio]-2-butanone | 0,433431344                     | 0,021799874 | 0,106794887       |
| 183.0672073 | HMDB0001490, HMDB0035056, HMDB0036072, HMDB0039650, HMDB0040603, HMDB0059730, HMDB0125593, HMDB0125597, HMDB0126618, HMDB0126619, HMDB0126620, HMDB0131233, HMDB01490, HMDB02909, HMDB06775, HMDB35056, HMDB36072, HMDB39650, HMDB40603, HMDB59730                                                                                                                                                                                                                                                                                                                                                                                                                                                                                                                                                                                       | 7-Methyl-2-hydroxy-6-oxoocta-2,4-dienoate   | 0,092968986                     | 0,359556969 | 0,61597972        |
| 183.0672073 | HMDB0001565, HMDB00284, HMDB01565                                                                                                                                                                                                                                                                                                                                                                                                                                                                                                                                                                                                                                                                                                                                                                                                        | Choline-P                                   | 0,092968986                     | 0,359556969 | 0,61597972        |
| 183.0672073 | HMDB0029748, HMDB29748                                                                                                                                                                                                                                                                                                                                                                                                                                                                                                                                                                                                                                                                                                                                                                                                                   | 2-Aminodipyrido[1,2-a:3'',2''-d]imidazole   | 0,092968986                     | 0,359556969 | 0,61597972        |
| 183.1025652 | HMDB0036117, HMDB0036998, HMDB0039052, HMDB0039710, HMDB0040883, HMDB36117, HMDB36998, HMDB39052, HMDB39710, HMDB40883                                                                                                                                                                                                                                                                                                                                                                                                                                                                                                                                                                                                                                                                                                                   | 5-exo-Hydroxy-1,2-campholide                | 0,128917821                     | 0,033715789 | 0,143415452       |
| 183.1381593 | HMDB00031062, HMDB00031063, HMDB00031087, HMDB00031272, HMDB00031406, HMDB00031691, HMDB00031843, HMDB00032308, HMDB00032320, HMDB00032396, HMDB00032404, HMDB00032453, HMDB00032461, HMDB00032489, HMDB00032534, HMDB00033371, HMDB00033724, HMDB00034428, HMDB00034429, HMDB00036140, HMDB00036784, HMDB00037106, HMDB00037185, HMDB00037225, HMDB00037309, HMDB00038273, HMDB00038274, HMDB00038277, HMDB00038278, HMDB00038311, HMDB00038906, HMDB0040593, HMDB31062, HMDB31063, HMDB31087, HMDB31272, HMDB31406, HMDB31691, HMDB31843, HMDB32308, HMDB32320, HMDB32396, HMDB32404, HMDB32453, HMDB32461, HMDB32489, HMDB32534, HMDB33371, HMDB33372, HMDB33724, HMDB34428, HMDB34429, HMDB36140, HMDB36784, HMDB37106, HMDB37185, HMDB37225, HMDB37309, HMDB38273, HMDB38274, HMDB38277, HMDB38278, HMDB38311, HMDB38906, HMDB40593 | Citronellyl formate                         | -0,233857684                    | 0,085318748 | 0,253054245       |
| 184.0973621 | HMDB0006348, HMDB0006548, HMDB0094728, HMDB0094729, HMDB0094730, HMDB0094731, HMDB006348, HMDB006548, HMDB094728, HMDB094729, HMDB094730, HMDB094731                                                                                                                                                                                                                                                                                                                                                                                                                                                                                                                                                                                                                                                                                     | Pseudoecgonine                              | -0,556208366                    | 0,022432472 | 0,109279974       |
| 184.9878352 | HMDB0061736, HMDB61736                                                                                                                                                                                                                                                                                                                                                                                                                                                                                                                                                                                                                                                                                                                                                                                                                   | Diethylthiophosphate                        | -0.020195668                    | 0,989974372 | 0,99357422        |
| 185.0566729 | HMDB0061890, HMDB61890                                                                                                                                                                                                                                                                                                                                                                                                                                                                                                                                                                                                                                                                                                                                                                                                                   | Pyroglutamylglycine                         | -0,112861735                    | 0,600317019 | 0,772089145       |
| 185.1178601 | HMDB0010724, HMDB0030367, HMDB0030369, HMDB0033010, HMDB0038692, HMDB0038978, HMDB0039533, HMDB0039582, HMDB0039587, HMDB0040204, HMDB0040205, HMDB0041376, HMDB0041545, HMDB10724, HMDB30367, HMDB30369, HMDB33010, HMDB38692, HMDB38978, HMDB39533, HMDB39582, HMDB39587, HMDB40204, HMDB40205, HMDB41376, HMDB41545                                                                                                                                                                                                                                                                                                                                                                                                                                                                                                                   | 3-Oxodecanoic acid                          | 0,561914126                     | 0,068206141 | 0,214705473       |

Supplementary Appendix  
MIRA Study

| m/z         | HMDB ID alternatives                                                                                                                                                                                                                                                                                                                                                                                                                                                                                                                                                                                                                                                                                                                                  | Suggested annotation                 | Comparison [vegan] - [omnivore] |             |                   |
|-------------|-------------------------------------------------------------------------------------------------------------------------------------------------------------------------------------------------------------------------------------------------------------------------------------------------------------------------------------------------------------------------------------------------------------------------------------------------------------------------------------------------------------------------------------------------------------------------------------------------------------------------------------------------------------------------------------------------------------------------------------------------------|--------------------------------------|---------------------------------|-------------|-------------------|
|             |                                                                                                                                                                                                                                                                                                                                                                                                                                                                                                                                                                                                                                                                                                                                                       |                                      | Fold Change (log2)              | p-value     | p-value (BH adj.) |
| 185,1541854 | HMDB0000947, HMDB0002373, HMDB00032044, HMDB00032325, HMDB00032448, HMDB00033618, HMDB00033848, HMDB00034134, HMDB00034456, HMDB00034458, HMDB00034460, HMDB00036034, HMDB00036229, HMDB00038237, HMDB00038267, HMDB00039215, HMDB00040171, HMDB00040193, HMDB00040266, HMDB00041559, HMDB00059831, HMDB00059860, HMDB00062119, HMDB00094659, HMDB000947, HMDB002373, HMDB032044, HMDB32325, HMDB32448, HMDB33618, HMDB33848, HMDB34134, HMDB34456, HMDB34458, HMDB34460, HMDB36034, HMDB36229, HMDB38237, HMDB38267, HMDB39215, HMDB40171, HMDB40193, HMDB40266, HMDB41559, HMDB59831, HMDB59860, HMDB62119, HMDB94659                                                                                                                               | Undecanoic acid                      | -0,228969409                    | 0,001643841 | 0,017064634       |
| 186,055608  | HMDB0000734, HMDB000734                                                                                                                                                                                                                                                                                                                                                                                                                                                                                                                                                                                                                                                                                                                               | Indoleacrylic acid                   | 0,896632568                     | 0,003372353 | 0,027228624       |
| 187,0073655 | HMDB0011635, HMDB00034782, HMDB11635, HMDB34782                                                                                                                                                                                                                                                                                                                                                                                                                                                                                                                                                                                                                                                                                                       | p-Cresol sulfate                     | -0,675351815                    | 0,22540592  | 0,473219052       |
| 187,1326573 | HMDB0002203, HMDB0010725, HMDB0003201, HMDB00033574, HMDB00033640, HMDB00034783, HMDB00038186, HMDB00039470, HMDB00039668, HMDB00039669, HMDB00039893, HMDB00040329, HMDB00041600, HMDB02203, HMDB10725, HMDB33201, HMDB33574, HMDB33640, HMDB34783, HMDB38186, HMDB39470, HMDB39668, HMDB39669, HMDB39893, HMDB40329, HMDB41600                                                                                                                                                                                                                                                                                                                                                                                                                      | 3-Hydroxycaproic acid                | 0,118272928                     | 0,376054265 | 0,628197929       |
| 188,0713057 | HMDB0002302, HMDB0014970, HMDB0029738, HMDB02302, HMDB14970, HMDB29738                                                                                                                                                                                                                                                                                                                                                                                                                                                                                                                                                                                                                                                                                | 3-Indolepropionic acid               | 0,418964868                     | 0,403024195 | 0,646738154       |
| 188,9867414 | HMDB00059724, HMDB00061713, HMDB059724, HMDB61713                                                                                                                                                                                                                                                                                                                                                                                                                                                                                                                                                                                                                                                                                                     | Pyrocatechol sulfate                 | 0,195856679                     | 0,733591813 | 0,867529672       |
| 189,0394304 | HMDB0012710, HMDB00059927, HMDB12710, HMDB59927                                                                                                                                                                                                                                                                                                                                                                                                                                                                                                                                                                                                                                                                                                       | 3-Dehydroquininate                   | 0,044842714                     | 0,96573237  | 0,984003393       |
| 189,0873166 | HMDB0001370, HMDB0028697, HMDB0029054, HMDB0031412, HMDB0039222, HMDB01370, HMDB28697, HMDB29054, HMDB31412, HMDB39222                                                                                                                                                                                                                                                                                                                                                                                                                                                                                                                                                                                                                                | Diaminopimelate                      | 0,13355622                      | 0,65355842  | 0,812985652       |
| 189,0947498 | HMDB0032346, HMDB0032372, HMDB0032427, HMDB32346, HMDB32372, HMDB32427                                                                                                                                                                                                                                                                                                                                                                                                                                                                                                                                                                                                                                                                                | (+/-)-Isobutyl 3-methylthiobutyrate  | 0,205700288                     | 0,995221078 | 0,996363697       |
| 189,0982124 | HMDB0004224, HMDB00034326, HMDB04224, HMDB34326                                                                                                                                                                                                                                                                                                                                                                                                                                                                                                                                                                                                                                                                                                       | Hydroxy-Arg                          | 0,317279429                     | 0,396582348 | 0,642625361       |
| 190,9747718 | HMDB0060347, HMDB60347                                                                                                                                                                                                                                                                                                                                                                                                                                                                                                                                                                                                                                                                                                                                | 2-Chloromaleylacetate                | 0,062465649                     | 0,356943729 | 0,614412217       |
| 191,0192537 | HMDB0000094, HMDB0000193, HMDB0001874, HMDB0005971, HMDB0006511, HMDB00094, HMDB000193, HMDB0003717, HMDB0041862, HMDB01874, HMDB05971, HMDB06511, HMDB33717, HMDB41862                                                                                                                                                                                                                                                                                                                                                                                                                                                                                                                                                                               | (Iso)Citrate                         | -0,106838925                    | 0,310115187 | 0,569306197       |
| 191,0329619 | HMDB0031186, HMDB31186                                                                                                                                                                                                                                                                                                                                                                                                                                                                                                                                                                                                                                                                                                                                | N-Nitrosothialdine                   | -0,117768505                    | 0,266455962 | 0,528067269       |
| 191,1432326 | HMDB0029820, HMDB0029821, HMDB0029822, HMDB0029823, HMDB0029824, HMDB0029825, HMDB0031733, HMDB0032498, HMDB0032541, HMDB0033545, HMDB0034671, HMDB0034959, HMDB0034979, HMDB0035682, HMDB0035753, HMDB0036022, HMDB0036027, HMDB0036144, HMDB0036565, HMDB0036684, HMDB0036818, HMDB0037139, HMDB0041615, HMDB0059883, HMDB29820, HMDB29821, HMDB29822, HMDB29823, HMDB29824, HMDB29825, HMDB31733, HMDB32498, HMDB32541, HMDB33545, HMDB34671, HMDB34959, HMDB34979, HMDB35682, HMDB35753, HMDB36022, HMDB36027, HMDB36144, HMDB36565, HMDB36684, HMDB36818, HMDB37139, HMDB41615, HMDB59883                                                                                                                                                        | 2,6-Diisopropyl-3-methylphenol       | -0,01379523                     | 0,717426283 | 0,860243607       |
| 192,0662122 | HMDB0000821, HMDB0000859, HMDB0011723, HMDB0013245, HMDB0013292, HMDB0032388, HMDB0034250, HMDB0060866, HMDB0060889, HMDB0060899, HMDB0060758, HMDB00821, HMDB00859, HMDB11723, HMDB13245, HMDB13292, HMDB32388, HMDB34250, HMDB60366, HMDB60389, HMDB60758                                                                                                                                                                                                                                                                                                                                                                                                                                                                                           | Phenylacetylglycine                  | 0,00545956                      | 0,722226088 | 0,862713902       |
| 193,0717558 | HMDB0029915, HMDB0029916, HMDB0029965, HMDB0031437, HMDB0031449, HMDB0033816, HMDB0034219, HMDB0034221, HMDB0034222, HMDB0062564, HMDB29915, HMDB29916, HMDB29965, HMDB31437, HMDB31449, HMDB33816, HMDB34219, HMDB34221, HMDB34222, HMDB62564                                                                                                                                                                                                                                                                                                                                                                                                                                                                                                        | D-4-O-Methyl-myoinositol             | 0,200013416                     | 0,401970702 | 0,646713011       |
| 193,0854635 | HMDB0031517, HMDB0031984, HMDB0032575, HMDB0032590, HMDB0034206, HMDB0034990, HMDB0036432, HMDB0037271, HMDB0040730, HMDB0041194, HMDB0041505, HMDB0041506, HMDB0041666, HMDB0059898, HMDB0059940, HMDB0059941, HMDB0059942, HMDB0059943, HMDB0124918, HMDB0126161, HMDB0126162, HMDB0126163, HMDB0126262, HMDB0126462, HMDB0126463, HMDB0126464, HMDB0126465, HMDB0126466, HMDB0132270, HMDB0133190, HMDB0133191, HMDB0133192, HMDB0133193, HMDB0133194, HMDB0133463, HMDB0133484, HMDB0133515, HMDB0133538, HMDB0141323, HMDB31517, HMDB31984, HMDB32575, HMDB32590, HMDB34206, HMDB34990, HMDB36432, HMDB37271, HMDB40730, HMDB41194, HMDB41505, HMDB41506, HMDB41666, HMDB59898, HMDB59940, HMDB59941, HMDB59942, HMDB59943, HMDB59944, HMDB59945 | (R)-3-Hydroxy-5-phenylpentanoic acid | 0,044930383                     | 0,585322921 | 0,762941837       |
| 193,1225955 | HMDB0014018, HMDB0031840, HMDB0032567, HMDB0034450, HMDB0035126, HMDB0035375, HMDB0035376, HMDB0035801, HMDB0037018, HMDB0037231, HMDB0037389, HMDB0038046, HMDB0038292, HMDB0039685, HMDB0040439, HMDB0041497, HMDB0041610, HMDB0132986, HMDB14018, HMDB31840, HMDB32567, HMDB34450, HMDB35126, HMDB35375, HMDB35376, HMDB35801, HMDB37018, HMDB37231, HMDB37389, HMDB38046, HMDB38292, HMDB39685, HMDB40439, HMDB41497, HMDB41610                                                                                                                                                                                                                                                                                                                   | 4-Hydroxypropofol                    | 0,626081249                     | 0,084895788 | 0,253054245       |
| 194,0450549 | HMDB0000840, HMDB0001229, HMDB0002016, HMDB0002404, HMDB0004067, HMDB0006116, HMDB0013678, HMDB0030726, HMDB0038055, HMDB0039119, HMDB0060602, HMDB00840, HMDB02016, HMDB02404, HMDB04067, HMDB06116, HMDB06340, HMDB13678, HMDB30726, HMDB38055, HMDB39119, HMDB60602                                                                                                                                                                                                                                                                                                                                                                                                                                                                                | Salicylic acid                       | 0,080481954                     | 0,937647058 | 0,975690018       |
| 194,0808955 | HMDB0014903, HMDB0029217, HMDB0041943, HMDB0060065, HMDB0060351, HMDB14903, HMDB29217, HMDB41943, HMDB60065, HMDB60351                                                                                                                                                                                                                                                                                                                                                                                                                                                                                                                                                                                                                                | Methyl-Tyr                           | 0,078144819                     | 0,586944886 | 0,763904389       |
| 195,0501565 | HMDB0000565, HMDB0000625, HMDB0003290, HMDB00565, HMDB00625, HMDB03290, HMDB03373                                                                                                                                                                                                                                                                                                                                                                                                                                                                                                                                                                                                                                                                     | Hexonic acid                         | -0,008541179                    | 0,82677107  | 0,917884016       |
| 195,0847441 | HMDB0040241, HMDB40241                                                                                                                                                                                                                                                                                                                                                                                                                                                                                                                                                                                                                                                                                                                                | 1-(2-Thienyl)-1-heptanone            | 0,251018976                     | 0,079619313 | 0,239407038       |
| 195,1016176 | HMDB0036226, HMDB0037725, HMDB0037734, HMDB0135672, HMDB36226, HMDB37725, HMDB37734                                                                                                                                                                                                                                                                                                                                                                                                                                                                                                                                                                                                                                                                   | 2,6-Dimethoxy-4-propylphenol         | -1,61126169                     | 0,002112907 | 0,019693506       |

Supplementary Appendix  
MIRA Study

| m/z         | HMDB ID alternatives                                                                                                                                                                                                                                                                                                                                                                                                                                                                                                                                                                                                                                                                           | Suggested annotation                                            | Comparison [vegan] - [omnivore] |             |                   |
|-------------|------------------------------------------------------------------------------------------------------------------------------------------------------------------------------------------------------------------------------------------------------------------------------------------------------------------------------------------------------------------------------------------------------------------------------------------------------------------------------------------------------------------------------------------------------------------------------------------------------------------------------------------------------------------------------------------------|-----------------------------------------------------------------|---------------------------------|-------------|-------------------|
|             |                                                                                                                                                                                                                                                                                                                                                                                                                                                                                                                                                                                                                                                                                                |                                                                 | Fold Change (log2)              | p-value     | p-value (BH adj.) |
| 195,111952  | HMDB0029741, HMDB0040551, HMDB29741, HMDB40551                                                                                                                                                                                                                                                                                                                                                                                                                                                                                                                                                                                                                                                 | 2-Isopropyl-3,5-dimethoxy-6-methylpyrazine                      | -1,333184847                    | 0,001215469 | 0,013588325       |
| 195,13813   | HMDB0030867, HMDB0030945, HMDB0031030, HMDB0031692, HMDB0032051, HMDB0032193, HMDB0032331, HMDB0032901, HMDB0034903, HMDB0035157, HMDB0036048, HMDB0036599, HMDB0037301, HMDB0038270, HMDB0038280, HMDB0039522, HMDB0040206, HMDB0040227, HMDB0040397, HMDB0040725, HMDB0041469, HMDB0041494, HMDB0061816, HMDB30867, HMDB30945, HMDB31030, HMDB31692, HMDB32051, HMDB32193, HMDB32331, HMDB32901, HMDB34903, HMDB35157, HMDB36048, HMDB36599, HMDB37301, HMDB38270, HMDB38280, HMDB39522, HMDB40206, HMDB40227, HMDB40397, HMDB40725, HMDB41469, HMDB41494, HMDB61816                                                                                                                         | Dihydro-5-(2-octenyl)-2(3H)-furanone                            | 0,212086066                     | 0,041589745 | 0,164049886       |
| 197,0420496 | HMDB0040164, HMDB40164                                                                                                                                                                                                                                                                                                                                                                                                                                                                                                                                                                                                                                                                         | 4-Methylidibenzothiophene                                       | 0,037780431                     | 0,824695788 | 0,917884016       |
| 197,0676826 | HMDB0004400, HMDB0059771, HMDB04400, HMDB59771                                                                                                                                                                                                                                                                                                                                                                                                                                                                                                                                                                                                                                                 | 5-Acetylamino-6-amino-3-methyluracil                            | -0,682206223                    | 0,152735466 | 0,380720112       |
| 197,0803431 | HMDB0004998, HMDB0030991, HMDB0033093, HMDB0034099, HMDB0059768, HMDB0059779, HMDB0131265, HMDB0135755, HMDB04998, HMDB30991, HMDB33093, HMDB34099, HMDB59768, HMDB59779                                                                                                                                                                                                                                                                                                                                                                                                                                                                                                                       | Guaifenesin                                                     | -0,105591813                    | 0,175296952 | 0,412289381       |
| 197,0926746 | HMDB0014606, HMDB14606                                                                                                                                                                                                                                                                                                                                                                                                                                                                                                                                                                                                                                                                         | Metharbital                                                     | -0,071538386                    | 0,240470495 | 0,494552526       |
| 197,1539661 | HMDB0000529, HMDB0010729, HMDB0029585, HMDB0029763, HMDB0031683, HMDB0032214, HMDB0032235, HMDB0032248, HMDB0033378, HMDB0034160, HMDB0034844, HMDB0036182, HMDB0037186, HMDB0037305, HMDB0037329, HMDB0037498, HMDB0037742, HMDB0037813, HMDB0038081, HMDB0038269, HMDB0038895, HMDB0038924, HMDB0039220, HMDB0040158, HMDB0040163, HMDB0040361, HMDB0041264, HMDB0041449, HMDB00529, HMDB10729, HMDB29585, HMDB29763, HMDB31683, HMDB32214, HMDB32235, HMDB32248, HMDB33378, HMDB34160, HMDB34844, HMDB36182, HMDB37186, HMDB37305, HMDB37329, HMDB37498, HMDB37742, HMDB37813, HMDB38081, HMDB38269, HMDB38895, HMDB38924, HMDB39220, HMDB40158, HMDB40163, HMDB40361, HMDB41264, HMDB41449 | C12:1                                                           | -0,29449552                     | 0,06844968  | 0,214705473       |
| 198,088931  | HMDB0060477, HMDB60477                                                                                                                                                                                                                                                                                                                                                                                                                                                                                                                                                                                                                                                                         | gamma-Glutamyl-beta-aminopropionitrile                          | -0,098804552                    | 0,034454739 | 0,145847243       |
| 199,0371326 | HMDB0037192, HMDB37192                                                                                                                                                                                                                                                                                                                                                                                                                                                                                                                                                                                                                                                                         | Potassium 2-(1''-ethoxy)ethoxypropanoate                        | 0,277197979                     | 0,17541211  | 0,412289381       |
| 199,0974467 | HMDB0000603, HMDB0013227, HMDB0030989, HMDB0030990, HMDB0034491, HMDB0034971, HMDB0036715, HMDB00603, HMDB13227, HMDB30989, HMDB30990, HMDB34491, HMDB34971, HMDB36715                                                                                                                                                                                                                                                                                                                                                                                                                                                                                                                         | cis-4-Decenedioic acid                                          | -0,094355783                    | 0,515353538 | 0,730874126       |
| 199,1697699 | HMDB0000638, HMDB0030998, HMDB0032310, HMDB0032440, HMDB0033619, HMDB0034128, HMDB0034136, HMDB0034137, HMDB0035410, HMDB0036225, HMDB0040166, HMDB0059868, HMDB0060638, HMDB30998, HMDB32310, HMDB32440, HMDB33619, HMDB34128, HMDB34136, HMDB34137, HMDB35410, HMDB36225, HMDB40166, HMDB59868                                                                                                                                                                                                                                                                                                                                                                                               | Dodecanoic acid (FA12:0)                                        | 0,110881254                     | 0,67828546  | 0,834224148       |
| 199,9678561 | HMDB0000731, HMDB00731                                                                                                                                                                                                                                                                                                                                                                                                                                                                                                                                                                                                                                                                         | Sulfo-Cys                                                       | 0,59816557                      | 0,708848572 | 0,853751319       |
| 200,129109  | HMDB0000832, HMDB0013116, HMDB0041540, HMDB0059745, HMDB00832, HMDB13116, HMDB41540, HMDB59745                                                                                                                                                                                                                                                                                                                                                                                                                                                                                                                                                                                                 | Capryloylglycine                                                | -0,011939013                    | 0,671389624 | 0,828078858       |
| 201,0222307 | HMDB0062551, HMDB0062721, HMDB62551, HMDB62721                                                                                                                                                                                                                                                                                                                                                                                                                                                                                                                                                                                                                                                 | 4-ethylphenylsulfate                                            | 0,238235001                     | 0,838341665 | 0,921212686       |
| 201,0759976 | HMDB0032306, HMDB0033092, HMDB32306, HMDB33092                                                                                                                                                                                                                                                                                                                                                                                                                                                                                                                                                                                                                                                 | 4-Heptanal diethyl acetal                                       | -0,261045778                    | 0,281335554 | 0,546386287       |
| 201,1238229 | HMDB0028690, HMDB0028691, HMDB0028900, HMDB0028922, HMDB0094713, HMDB28690, HMDB28691, HMDB28900, HMDB28922, HMDB94713                                                                                                                                                                                                                                                                                                                                                                                                                                                                                                                                                                         | Alanyl-Isoleucine                                               | -0,143481144                    | 0,531886657 | 0,745667467       |
| 201,1485984 | HMDB0032443, HMDB0061654, HMDB32443, HMDB61654                                                                                                                                                                                                                                                                                                                                                                                                                                                                                                                                                                                                                                                 | 3-Hydroxynonyl acetate                                          | -0,453864252                    | 6,25591E-08 | 4,54596E-06       |
| 202,0821324 | HMDB0028682, HMDB0028724, HMDB0028797, HMDB0028839, HMDB0028855, HMDB28682, HMDB28724, HMDB28797, HMDB28839, HMDB28855                                                                                                                                                                                                                                                                                                                                                                                                                                                                                                                                                                         | Alanyl-Asparagine                                               | 0,023501935                     | 0,985964339 | 0,99357422        |
| 203,0021106 | HMDB0060013, HMDB60013                                                                                                                                                                                                                                                                                                                                                                                                                                                                                                                                                                                                                                                                         | O-methoxycatechol-O-sulphate                                    | -0,544522618                    | 0,057388101 | 0,196244799       |
| 203,0559769 | HMDB0041031, HMDB41031                                                                                                                                                                                                                                                                                                                                                                                                                                                                                                                                                                                                                                                                         | 3,5,6-Trihydroxy-5-(hydroxymethyl)-2-methoxy-2-cyclohexen-1-one | -0,125073628                    | 0,327383166 | 0,59105201        |
| 203,0818546 | HMDB0000929, HMDB0013609, HMDB0013840, HMDB0014892, HMDB0030396, HMDB0060533, HMDB0060878, HMDB0060967, HMDB00929, HMDB13609, HMDB13840, HMDB14892, HMDB30396, HMDB60533, HMDB60878, HMDB60967                                                                                                                                                                                                                                                                                                                                                                                                                                                                                                 | Tryptophan                                                      | -0,095465168                    | 0,135995628 | 0,351893733       |
| 204,0661099 | HMDB0000671, HMDB0004096, HMDB0011621, HMDB0030179, HMDB0032755, HMDB0059765, HMDB0060671, HMDB04096, HMDB11621, HMDB30179, HMDB32755, HMDB59765                                                                                                                                                                                                                                                                                                                                                                                                                                                                                                                                               | Indolelactic acid                                               | -0,020071492                    | 0,643588276 | 0,804024321       |
| 204,9810847 | HMDB0059752, HMDB0060016, HMDB0060018, HMDB59752, HMDB60016, HMDB60018                                                                                                                                                                                                                                                                                                                                                                                                                                                                                                                                                                                                                         | 5-Sulfoxymethylfurfural                                         | -0,175489433                    | 0,63800237  | 0,801639866       |
| 205,0148197 | HMDB0128623, HMDB0128624, HMDB0128625, HMDB0131684, HMDB0136642, HMDB0136643                                                                                                                                                                                                                                                                                                                                                                                                                                                                                                                                                                                                                   | 7-hydroxy-1-oxo-1H-isochromene-3-carboxylic acid                | 0,080218537                     | 0,723668453 | 0,863254296       |
| 205,0490557 | HMDB0029466, HMDB0029472, HMDB0029775, HMDB0030818, HMDB0032952, HMDB0035303, HMDB0036627, HMDB0129368, HMDB0136784, HMDB29466, HMDB29472, HMDB29775, HMDB30818, HMDB32952, HMDB35303, HMDB36627                                                                                                                                                                                                                                                                                                                                                                                                                                                                                               | Eugenitol                                                       | 0,084276723                     | 0,389080519 | 0,64014757        |



Supplementary Appendix  
MIRA Study

| m/z         | HMDB ID alternatives                                                                                                                                                                                                                                                                                                                                                                                                                                                                                                                                                                                        | Suggested annotation                           | Comparison [vegan] - [omnivore] |             |                   |
|-------------|-------------------------------------------------------------------------------------------------------------------------------------------------------------------------------------------------------------------------------------------------------------------------------------------------------------------------------------------------------------------------------------------------------------------------------------------------------------------------------------------------------------------------------------------------------------------------------------------------------------|------------------------------------------------|---------------------------------|-------------|-------------------|
|             |                                                                                                                                                                                                                                                                                                                                                                                                                                                                                                                                                                                                             |                                                | Fold Change (log2)              | p-value     | p-value (BH adj.) |
| 205.0646378 | HMDB0028847, HMDB0028973, HMDB28847, HMDB28973                                                                                                                                                                                                                                                                                                                                                                                                                                                                                                                                                              | Glycyl-Methionine                              | 0.03615653                      | 0.725789765 | 0.864557648       |
| 205.0849516 | HMDB0029049, HMDB0029070, HMDB29049, HMDB29070                                                                                                                                                                                                                                                                                                                                                                                                                                                                                                                                                              | SerinyI-Threonine                              | -0.049139641                    | 0.293426463 | 0.554284447       |
| 205.1237757 | HMDB0001925, HMDB0029669, HMDB0032176, HMDB0033196, HMDB0034469, HMDB0034470, HMDB0034472, HMDB0034556, HMDB0035008, HMDB0035016, HMDB0035017, HMDB0035181, HMDB0036025, HMDB0036240, HMDB0036386, HMDB0036391, HMDB0037194, HMDB0037604, HMDB0037623, HMDB0037720, HMDB0038605, HMDB0039101, HMDB0040431, HMDB0132932, HMDB0132940, HMDB01872, HMDB01925, HMDB29669, HMDB32176, HMDB33196, HMDB34469, HMDB34470, HMDB34472, HMDB34556, HMDB35008, HMDB35016, HMDB35017, HMDB35181, HMDB36025, HMDB36240, HMDB36386, HMDB36391, HMDB37194, HMDB37604, HMDB37623, HMDB37720, HMDB38605, HMDB39101, HMDB40431 | Ibuprofen                                      | 0.155398494                     | 0.575297943 | 0.762286527       |
| 205.1588799 | HMDB0013825, HMDB0031737, HMDB0031738, HMDB0032397, HMDB0032528, HMDB0035245, HMDB0035631, HMDB0036023, HMDB0036024, HMDB0038130, HMDB0061831, HMDB0133179, HMDB13825, HMDB13737, HMDB13738, HMDB32397, HMDB32528, HMDB35245, HMDB35631, HMDB36023, HMDB36024, HMDB38130, HMDB61831                                                                                                                                                                                                                                                                                                                         | 4-(1,1,3,3-Tetramethylbutyl)-phenol            | 0.029350653                     | 0.012310888 | 0.070559298       |
| 207.1387491 | HMDB0029668, HMDB0031869, HMDB0034672, HMDB0034984, HMDB0035228, HMDB0036686, HMDB0036821, HMDB0036824, HMDB0037776, HMDB0038047, HMDB0038529, HMDB0040233, HMDB0041636, HMDB0132947, HMDB29668, HMDB31869, HMDB34672, HMDB34984, HMDB35228, HMDB36686, HMDB36821, HMDB36824, HMDB37776, HMDB38047, HMDB38529, HMDB40233, HMDB41636                                                                                                                                                                                                                                                                         | Eremopetasinorol                               | 0.096502073                     | 0.066810505 | 0.214186619       |
| 209.0314221 | HMDB0000639, HMDB0000663, HMDB0029881, HMDB00639, HMDB00663, HMDB03435, HMDB29881                                                                                                                                                                                                                                                                                                                                                                                                                                                                                                                           | Galactaric acid                                | 0.211494018                     | 0.153685183 | 0.380720112       |
| 209.0451498 | HMDB0011714, HMDB0035484, HMDB0125514, HMDB0125515, HMDB0125516, HMDB0127490, HMDB0127946, HMDB0127947, HMDB0132221, HMDB0132228, HMDB0140909, HMDB0141258, HMDB0141331, HMDB0142176, HMDB0142177, HMDB0142178, HMDB0142180, HMDB0142181, HMDB11714, HMDB35484                                                                                                                                                                                                                                                                                                                                              | Vanilpyruvic acid                              | -0.20774287                     | 0.574699852 | 0.762286527       |
| 209.0808315 | HMDB0013070, HMDB0029187, HMDB0029233, HMDB0033798, HMDB0034047, HMDB0036199, HMDB0039428, HMDB0041406, HMDB0060737, HMDB0125803, HMDB0127493, HMDB0129253, HMDB0129254, HMDB0129255, HMDB0129256, HMDB0130385, HMDB0133478, HMDB0133511, HMDB0133519, HMDB0133526, HMDB0133535, HMDB0135671, HMDB13070, HMDB29187, HMDB29233, HMDB33798, HMDB34047, HMDB36199, HMDB39428, HMDB41406, HMDB60737                                                                                                                                                                                                             | Sinapyl alcohol                                | -0.207032314                    | 0.155134697 | 0.382139705       |
| 209.0929991 | HMDB0015441, HMDB15441                                                                                                                                                                                                                                                                                                                                                                                                                                                                                                                                                                                      | Aprobarbital                                   | 0.021646827                     | 0.633679962 | 0.801639866       |
| 209.1175289 | HMDB0032797, HMDB0032871, HMDB0033102, HMDB0037104, HMDB0037135, HMDB0037642, HMDB0037735, HMDB0037816, HMDB0041573, HMDB32797, HMDB32871, HMDB33102, HMDB37104, HMDB37135, HMDB37642, HMDB37735, HMDB37816, HMDB41573                                                                                                                                                                                                                                                                                                                                                                                      | Jasmonic acid                                  | 0.083333593                     | 0.494099682 | 0.718091538       |
| 209.1533475 | HMDB0014631, HMDB14631                                                                                                                                                                                                                                                                                                                                                                                                                                                                                                                                                                                      | Altretamine                                    | 0.135461927                     | 0.375326638 | 0.628197929       |
| 210.0876323 | HMDB0015078, HMDB15078                                                                                                                                                                                                                                                                                                                                                                                                                                                                                                                                                                                      | Zalcitabine                                    | -0.052840324                    | 0.689517902 | 0.843281362       |
| 211.024341  | HMDB0125210, HMDB0126568, HMDB0126571, HMDB0128683, HMDB0128685, HMDB0137303                                                                                                                                                                                                                                                                                                                                                                                                                                                                                                                                | 2-oxo-3-(3,4,5-trihydroxyphenyl)propan acid    | -0.421076937                    | 0.007273369 | 0.048048317       |
| 211.0387964 | HMDB0013696, HMDB0032997, HMDB0032999, HMDB13696, HMDB32997, HMDB32999                                                                                                                                                                                                                                                                                                                                                                                                                                                                                                                                      | Urolithin B                                    | -0.149967476                    | 0.013399387 | 0.074083072       |
| 211.0757791 | HMDB0014814, HMDB0032039, HMDB14814, HMDB32039                                                                                                                                                                                                                                                                                                                                                                                                                                                                                                                                                              | Benzyl Benzoate                                | -0.096625044                    | 0.955822852 | 0.981716758       |
| 211.1089238 | HMDB0011180, HMDB0014382, HMDB0015442, HMDB11180, HMDB14382, HMDB15442                                                                                                                                                                                                                                                                                                                                                                                                                                                                                                                                      | L-prolyl-L-proline                             | -1.059075154                    | 0.008730645 | 0.055167555       |
| 211.133311  | HMDB0029388, HMDB0033601, HMDB0035085, HMDB0037326, HMDB0041572, HMDB29388, HMDB33601, HMDB35085, HMDB37326, HMDB41572                                                                                                                                                                                                                                                                                                                                                                                                                                                                                      | Cucurbit acid                                  | 0.127294227                     | 0.04930686  | 0.178404903       |
| 211.1695585 | HMDB0031017, HMDB0031028, HMDB0031741, HMDB0032792, HMDB0034286, HMDB0037187, HMDB0037226, HMDB0037626, HMDB0037907, HMDB0038078, HMDB0039805, HMDB0040451, HMDB31017, HMDB31028, HMDB31741, HMDB32792, HMDB34286, HMDB37187, HMDB37226, HMDB37626, HMDB37907, HMDB38078, HMDB39805, HMDB40451                                                                                                                                                                                                                                                                                                              | 10-Undecenyl acetate                           | -0.495287277                    | 9.65089E-08 | 6.47352E-06       |
| 212.0020116 | HMDB0000682, HMDB00682, HMDB03309                                                                                                                                                                                                                                                                                                                                                                                                                                                                                                                                                                           | Indoxyl sulfate                                | -0.221030773                    | 0.516305575 | 0.730874126       |
| 212.9822422 | HMDB0006801, HMDB06801                                                                                                                                                                                                                                                                                                                                                                                                                                                                                                                                                                                      | 2-Oxo-3-hydroxy-4-phosphobutanoic acid         | -0.0651599                      | 0.637247963 | 0.801639866       |
| 213.0223384 | HMDB0135284                                                                                                                                                                                                                                                                                                                                                                                                                                                                                                                                                                                                 | [(2E)-3-phenylprop-2-en-1-yl]oxysulfonic acid  | 0.581955269                     | 0.320934184 | 0.583131918       |
| 213.1129206 | HMDB0030984, HMDB0030985, HMDB0030986, HMDB30984, HMDB30985, HMDB30986                                                                                                                                                                                                                                                                                                                                                                                                                                                                                                                                      | 5-Hexyltetrahydro-2-oxo-3-furancarboxylic acid | -0.199649977                    | 0.206883217 | 0.453271773       |
| 213.1239414 | HMDB0003581, HMDB0029030, HMDB0029135, HMDB03581, HMDB29030, HMDB29135                                                                                                                                                                                                                                                                                                                                                                                                                                                                                                                                      | Dethiobiotin                                   | -0.27599797                     | 0.018503286 | 0.095472577       |
| 213.1491265 | HMDB0010727, HMDB0037398, HMDB10727, HMDB37398                                                                                                                                                                                                                                                                                                                                                                                                                                                                                                                                                              | 3-Oxododecanoic acid                           | 0.238326755                     | 0.163599692 | 0.39192014        |
| 213.1850427 | HMDB0000910, HMDB0029552, HMDB0031018, HMDB0032211, HMDB0034140, HMDB0036217, HMDB0036219, HMDB0037311, HMDB0038729, HMDB0059900, HMDB0061828, HMDB0061829, HMDB00910, HMDB29552, HMDB31018, HMDB32211, HMDB34140, HMDB36217, HMDB36219, HMDB37311, HMDB38729, HMDB59900, HMDB61828, HMDB61829                                                                                                                                                                                                                                                                                                              | C13:0                                          | -0.722417873                    | 5.15127E-05 | 0.000976502       |
| 214.1442777 | HMDB0013279, HMDB13279                                                                                                                                                                                                                                                                                                                                                                                                                                                                                                                                                                                      | N-Nonanoylglycine                              | -0.206725901                    | 0.93944923  | 0.976400154       |
| 215.0333854 | HMDB0014693, HMDB0030637, HMDB0138947, HMDB14693, HMDB30637                                                                                                                                                                                                                                                                                                                                                                                                                                                                                                                                                 | Methoxsalen                                    | 0.017370644                     | 0.547242381 | 0.756072946       |
| 216.0972709 | HMDB0000856, HMDB0028685, HMDB0028701, HMDB0028790, HMDB00856, HMDB28685, HMDB28701, HMDB28790                                                                                                                                                                                                                                                                                                                                                                                                                                                                                                              | N-a-Acetylitrulline                            | 0.027446837                     | 0.110949607 | 0.301395817       |

Supplementary Appendix  
MIRA Study

| m/z         | HMDB ID alternatives                                                                                                                                                                                                                                                                                                                                                                                                                                                                                                                                                                                                                                                                                                                                                                                                                                                                                                                                                                                                                                                                                                                                                                                                                                        | Suggested annotation                             | Comparison [vegan] - [omnivore] |             |                   |
|-------------|-------------------------------------------------------------------------------------------------------------------------------------------------------------------------------------------------------------------------------------------------------------------------------------------------------------------------------------------------------------------------------------------------------------------------------------------------------------------------------------------------------------------------------------------------------------------------------------------------------------------------------------------------------------------------------------------------------------------------------------------------------------------------------------------------------------------------------------------------------------------------------------------------------------------------------------------------------------------------------------------------------------------------------------------------------------------------------------------------------------------------------------------------------------------------------------------------------------------------------------------------------------|--------------------------------------------------|---------------------------------|-------------|-------------------|
|             |                                                                                                                                                                                                                                                                                                                                                                                                                                                                                                                                                                                                                                                                                                                                                                                                                                                                                                                                                                                                                                                                                                                                                                                                                                                             |                                                  | Fold Change (log2)              | p-value     | p-value (BH adj.) |
| 217,0861191 | HMDB0040358, HMDB40358                                                                                                                                                                                                                                                                                                                                                                                                                                                                                                                                                                                                                                                                                                                                                                                                                                                                                                                                                                                                                                                                                                                                                                                                                                      | (R)-Bitalin A                                    | -0,098755183                    | 0,013641534 | 0,074813947       |
| 218,0758672 | HMDB0060827, HMDB0061056, HMDB0060827, HMDB61056                                                                                                                                                                                                                                                                                                                                                                                                                                                                                                                                                                                                                                                                                                                                                                                                                                                                                                                                                                                                                                                                                                                                                                                                            | ID11614                                          | -0,02159889                     | 0,443332228 | 0,679412483       |
| 218,102413  | HMDB0000210, HMDB00210, HMDB0062717, HMDB62717                                                                                                                                                                                                                                                                                                                                                                                                                                                                                                                                                                                                                                                                                                                                                                                                                                                                                                                                                                                                                                                                                                                                                                                                              | Pantothenic acid                                 | 0,132211147                     | 0,287091714 | 0,548999945       |
| 219,1039003 | HMDB0032589, HMDB0037492, HMDB0040424, HMDB0061823, HMDB0061942, HMDB0132933, HMDB0132935, HMDB0132936, HMDB0132937, HMDB0132939, HMDB0132948, HMDB32589, HMDB37492, HMDB40424, HMDB61823, HMDB61942                                                                                                                                                                                                                                                                                                                                                                                                                                                                                                                                                                                                                                                                                                                                                                                                                                                                                                                                                                                                                                                        | 1-(5-Acetyl-2-hydroxyphenyl)-3-methyl-1-butanone | 0,090133115                     | 0,156306991 | 0,382286785       |
| 219,1394695 | HMDB0013817, HMDB0036389, HMDB0037606, HMDB0037714, HMDB0037718, HMDB0038996, HMDB0039539, HMDB0040217, HMDB0040226, HMDB0126515, HMDB0126516, HMDB0126517, HMDB0126518, HMDB0126519, HMDB0126520, HMDB0133164, HMDB0133165, HMDB0133166, HMDB0133167, HMDB0133169, HMDB0133170, HMDB0133180, HMDB13817, HMDB36389, HMDB37606, HMDB37714, HMDB37718, HMDB38996, HMDB39539, HMDB40217, HMDB40226                                                                                                                                                                                                                                                                                                                                                                                                                                                                                                                                                                                                                                                                                                                                                                                                                                                             | 2,6-Di-tert-butylbenzoquinone                    | 0,138289454                     | 0,460898794 | 0,692396623       |
| 219,1490211 | HMDB0014888, HMDB14888                                                                                                                                                                                                                                                                                                                                                                                                                                                                                                                                                                                                                                                                                                                                                                                                                                                                                                                                                                                                                                                                                                                                                                                                                                      | Prilocaine                                       | -0,181233463                    | 0,472145263 | 0,700188213       |
| 219,1732482 | HMDB0013688, HMDB0030232, HMDB0032220, HMDB0033826, HMDB0034661, HMDB0034718, HMDB0034940, HMDB0035020, HMDB0035026, HMDB0035097, HMDB0035306, HMDB0035391, HMDB0035645, HMDB0035704, HMDB0035718, HMDB0035720, HMDB0035739, HMDB0035793, HMDB0036118, HMDB0036192, HMDB0036402, HMDB0036420, HMDB0036716, HMDB0036717, HMDB0036788, HMDB0036789, HMDB0036793, HMDB0036798, HMDB0037069, HMDB0037392, HMDB0037395, HMDB0037811, HMDB0038119, HMDB0038123, HMDB0038134, HMDB0038146, HMDB0038160, HMDB0038193, HMDB0038208, HMDB0038209, HMDB0038210, HMDB0038211, HMDB0038212, HMDB0038512, HMDB0038982, HMDB0039532, HMDB0039711, HMDB0040763, HMDB0059836, HMDB0060356, HMDB0134152, HMDB13688, HMDB30232, HMDB32220, HMDB33826, HMDB34661, HMDB34718, HMDB34940, HMDB35020, HMDB35026, HMDB35097, HMDB35306, HMDB35391, HMDB35645, HMDB35704, HMDB35718, HMDB35720, HMDB35739, HMDB35793, HMDB36118, HMDB36192, HMDB36402, HMDB36420, HMDB36716, HMDB36717, HMDB36788, HMDB36789, HMDB36793, HMDB36798, HMDB37069, HMDB37392, HMDB37395, HMDB37811, HMDB38119, HMDB38123, HMDB38134, HMDB38146, HMDB38160, HMDB38193, HMDB38208, HMDB38209, HMDB38210, HMDB38211, HMDB38212, HMDB38512, HMDB38982, HMDB39532, HMDB39711, HMDB40763, HMDB59836, HMDB60356 | Nootkatol                                        | 0,178916043                     | 0,446368831 | 0,680478358       |
| 221,0908307 | HMDB0028848, HMDB0028995, HMDB28848, HMDB28995                                                                                                                                                                                                                                                                                                                                                                                                                                                                                                                                                                                                                                                                                                                                                                                                                                                                                                                                                                                                                                                                                                                                                                                                              | Glycyl-Phenylalanine                             | -0,072965923                    | 0,629485848 | 0,797895444       |
| 221,1542211 | HMDB0035593, HMDB0036790, HMDB0036791, HMDB0037820, HMDB0040178, HMDB35593, HMDB36790, HMDB36791, HMDB37605, HMDB37820, HMDB40178                                                                                                                                                                                                                                                                                                                                                                                                                                                                                                                                                                                                                                                                                                                                                                                                                                                                                                                                                                                                                                                                                                                           | Rishitin                                         | 0,218808922                     | 0,023318389 | 0,111723269       |
| 222,0524407 | HMDB0031805, HMDB31805                                                                                                                                                                                                                                                                                                                                                                                                                                                                                                                                                                                                                                                                                                                                                                                                                                                                                                                                                                                                                                                                                                                                                                                                                                      | (E)-Monocrotophos                                | -0,017644785                    | 0,804550038 | 0,904082001       |
| 222,1128918 | HMDB0015168, HMDB15168                                                                                                                                                                                                                                                                                                                                                                                                                                                                                                                                                                                                                                                                                                                                                                                                                                                                                                                                                                                                                                                                                                                                                                                                                                      | Cerulenin                                        | 0,158609088                     | 0,233330775 | 0,484439133       |
| 223,0598133 | HMDB0030018, HMDB0032616, HMDB0034069, HMDB0041691, HMDB0127488, HMDB0128183, HMDB0128665, HMDB0128667, HMDB0128668, HMDB0128673, HMDB0128674, HMDB0140920, HMDB0141325, HMDB0142075, HMDB0142169, HMDB0142170, HMDB0142171, HMDB0142172, HMDB0142173, HMDB0142174, HMDB30018, HMDB32616, HMDB34069, HMDB41691                                                                                                                                                                                                                                                                                                                                                                                                                                                                                                                                                                                                                                                                                                                                                                                                                                                                                                                                              | Elenolide                                        | 0,24166749                      | 0,018161848 | 0,09426864        |
| 223,0975951 | HMDB0030680, HMDB0030703, HMDB0032552, HMDB0032663, HMDB0036203, HMDB0040629, HMDB0040890, HMDB0124917, HMDB0124919, HMDB0124920, HMDB0125801, HMDB0127761, HMDB0127765, HMDB0135709, HMDB30680, HMDB30703, HMDB32552, HMDB32663, HMDB36203, HMDB40629, HMDB40890                                                                                                                                                                                                                                                                                                                                                                                                                                                                                                                                                                                                                                                                                                                                                                                                                                                                                                                                                                                           | Diplosporin                                      | 0,006522721                     | 0,437063902 | 0,675744189       |
| 223,1332325 | HMDB0029670, HMDB0032679, HMDB0032689, HMDB0034564, HMDB0036583, HMDB0037244, HMDB0037726, HMDB0037730, HMDB0037736, HMDB0112084, HMDB29670, HMDB32679, HMDB32689, HMDB34564, HMDB36583, HMDB37244, HMDB37726, HMDB37730, HMDB37736                                                                                                                                                                                                                                                                                                                                                                                                                                                                                                                                                                                                                                                                                                                                                                                                                                                                                                                                                                                                                         | Epoxyeremopetasinorol                            | -0,171760448                    | 0,013423309 | 0,074083072       |
| 223,1694808 | HMDB0000560, HMDB0030426, HMDB0030427, HMDB0031015, HMDB0032053, HMDB0032342, HMDB0032524, HMDB0036424, HMDB0037814, HMDB0038246, HMDB0038259, HMDB0038260, HMDB0039129, HMDB005060, HMDB30426, HMDB30427, HMDB31015, HMDB32053, HMDB32342, HMDB32524, HMDB36424, HMDB37814, HMDB38246, HMDB38259, HMDB38260, HMDB39129                                                                                                                                                                                                                                                                                                                                                                                                                                                                                                                                                                                                                                                                                                                                                                                                                                                                                                                                     | 5,8-Tetradecadienoic acid                        | 0,339898313                     | 0,160832318 | 0,389571615       |
| 225,0636575 | HMDB0011105, HMDB11105                                                                                                                                                                                                                                                                                                                                                                                                                                                                                                                                                                                                                                                                                                                                                                                                                                                                                                                                                                                                                                                                                                                                                                                                                                      | 5-Acetylamino-6-formylamino-3-methyluracil       | -0,000872935                    | 0,63648574  | 0,801639866       |
| 225,1123883 | HMDB0040705, HMDB0059729, HMDB40705, HMDB59729                                                                                                                                                                                                                                                                                                                                                                                                                                                                                                                                                                                                                                                                                                                                                                                                                                                                                                                                                                                                                                                                                                                                                                                                              | Allixin                                          | 0,116711927                     | 0,946004591 | 0,977865267       |
| 225,1847254 | HMDB0000499, HMDB0000521, HMDB0002000, HMDB0005051, HMDB0010732, HMDB0030921, HMDB0031029, HMDB0031073, HMDB0032152, HMDB0033231, HMDB0034561, HMDB0037188, HMDB0037189, HMDB0037227, HMDB0037228, HMDB0037369, HMDB0037633, HMDB0038056, HMDB0040228, HMDB00499, HMDB00521, HMDB0062243, HMDB0062248, HMDB0094671, HMDB02000, HMDB05051, HMDB10732, HMDB30921, HMDB31029, HMDB31073, HMDB32152, HMDB33231, HMDB34561, HMDB37188, HMDB37189, HMDB37227, HMDB37228, HMDB37369, HMDB37633, HMDB38056, HMDB40228, HMDB62243, HMDB62248, HMDB94671                                                                                                                                                                                                                                                                                                                                                                                                                                                                                                                                                                                                                                                                                                              | C14:1                                            | -0,901546589                    | 0,000219331 | 0,003355376       |
| 226,0344552 | HMDB0006794, HMDB0125157, HMDB0126635, HMDB06794                                                                                                                                                                                                                                                                                                                                                                                                                                                                                                                                                                                                                                                                                                                                                                                                                                                                                                                                                                                                                                                                                                                                                                                                            | 5-(2''-Carboxyethyl)-4,6-Dihydroxypicolinate     | -0,337750479                    | 0,023273261 | 0,111723269       |
| 226,9645976 | HMDB0037638, HMDB37638                                                                                                                                                                                                                                                                                                                                                                                                                                                                                                                                                                                                                                                                                                                                                                                                                                                                                                                                                                                                                                                                                                                                                                                                                                      | Ammonium peroxydisulfate                         | 0,005609415                     | 0,350915406 | 0,609558236       |
| 227,0000132 | HMDB0029735, HMDB29735                                                                                                                                                                                                                                                                                                                                                                                                                                                                                                                                                                                                                                                                                                                                                                                                                                                                                                                                                                                                                                                                                                                                                                                                                                      | 5-Ethynyl-5''-(1-propynyl)-2,2''-bithiophene     | 0,092604951                     | 0,003313648 | 0,027004686       |
| 227,0361747 | HMDB0013695, HMDB0030723, HMDB0030724, HMDB0142418, HMDB0142421, HMDB0142422, HMDB13695, HMDB30723, HMDB30724                                                                                                                                                                                                                                                                                                                                                                                                                                                                                                                                                                                                                                                                                                                                                                                                                                                                                                                                                                                                                                                                                                                                               | Urolithin A                                      | 0,139648863                     | 0,548192787 | 0,756072946       |

Supplementary Appendix  
MIRA Study

| m/z         | HMDB ID alternatives                                                                                                                                                                                                                                                                                                                                                                                                                                                                                                                                                                                                                                                                                                                                                                                                                                                                                                                                      | Suggested annotation                                         | Comparison [vegan] - [omnivore] |             |                   |
|-------------|-----------------------------------------------------------------------------------------------------------------------------------------------------------------------------------------------------------------------------------------------------------------------------------------------------------------------------------------------------------------------------------------------------------------------------------------------------------------------------------------------------------------------------------------------------------------------------------------------------------------------------------------------------------------------------------------------------------------------------------------------------------------------------------------------------------------------------------------------------------------------------------------------------------------------------------------------------------|--------------------------------------------------------------|---------------------------------|-------------|-------------------|
|             |                                                                                                                                                                                                                                                                                                                                                                                                                                                                                                                                                                                                                                                                                                                                                                                                                                                                                                                                                           |                                                              | Fold Change (log2)              | p-value     | p-value (BH adj.) |
| 227,1030676 | HMDB0006695, HMDB0028871, HMDB0029018, HMDB0040573, HMDB0094651, HMDB006695, HMDB28871, HMDB29018, HMDB40573, HMDB94651                                                                                                                                                                                                                                                                                                                                                                                                                                                                                                                                                                                                                                                                                                                                                                                                                                   | Prolylhydroxyproline                                         | 0,033435033                     | 0,499499473 | 0,722211629       |
| 227,1279562 | HMDB0000933, HMDB0030994, HMDB009933, HMDB30994                                                                                                                                                                                                                                                                                                                                                                                                                                                                                                                                                                                                                                                                                                                                                                                                                                                                                                           | Traumatic acid                                               | 1,333503349                     | 0,106151052 | 0,294788907       |
| 227,2017582 | HMDB0000806, HMDB0002221, HMDB0031072, HMDB0032318, HMDB0032548, HMDB0033788, HMDB0034461, HMDB0036216, HMDB0037312, HMDB0037495, HMDB0038034, HMDB0038969, HMDB0059865, HMDB0061781, HMDB00806, HMDB02221, HMDB31072, HMDB32318, HMDB32548, HMDB33788, HMDB34461, HMDB36216, HMDB37312, HMDB37495, HMDB38034, HMDB38969, HMDB59865, HMDB61781                                                                                                                                                                                                                                                                                                                                                                                                                                                                                                                                                                                                            | C14:0                                                        | -0,743258701                    | 0,000508989 | 0,006934977       |
| 228,1595911 | HMDB0013267, HMDB13267                                                                                                                                                                                                                                                                                                                                                                                                                                                                                                                                                                                                                                                                                                                                                                                                                                                                                                                                    | N-Decanoylglycine                                            | -0,159239233                    | 0,882026639 | 0,95071351        |
| 229,0170336 | HMDB0127980, HMDB0134048, HMDB0135258, HMDB0135295, HMDB0135297, HMDB0135299, HMDB0135301, HMDB0135303, HMDB0135304, HMDB0135306, HMDB0135307, HMDB0135311, HMDB0135656, HMDB0135657                                                                                                                                                                                                                                                                                                                                                                                                                                                                                                                                                                                                                                                                                                                                                                      | (4-ethenyl)-2-methoxyphenyl)oxindanes acid                   | 0,309408494                     | 0,272491274 | 0,537009745       |
| 229,1441049 | HMDB0000623, HMDB0030143, HMDB0041613, HMDB0041614, HMDB00623, HMDB30143, HMDB41613, HMDB41614                                                                                                                                                                                                                                                                                                                                                                                                                                                                                                                                                                                                                                                                                                                                                                                                                                                            | Dodecanedioic acid                                           | 0,436095836                     | 0,1827255   | 0,417740595       |
| 230,0122787 | HMDB0059911, HMDB0059994, HMDB59911, HMDB59994                                                                                                                                                                                                                                                                                                                                                                                                                                                                                                                                                                                                                                                                                                                                                                                                                                                                                                            | Paracetamol sulfate                                          | 0,16650654                      | 0,719171548 | 0,860243607       |
| 230,1136221 | HMDB0028744, HMDB0029122, HMDB28744, HMDB29122                                                                                                                                                                                                                                                                                                                                                                                                                                                                                                                                                                                                                                                                                                                                                                                                                                                                                                            | Asparaginyln-Valine                                          | -0,025387218                    | 0,943258499 | 0,977865267       |
| 231,0109505 | HMDB0035145, HMDB35145                                                                                                                                                                                                                                                                                                                                                                                                                                                                                                                                                                                                                                                                                                                                                                                                                                                                                                                                    | Chrycolide                                                   | 0,024177367                     | 0,827358758 | 0,917884016       |
| 231,0317723 | HMDB0127988                                                                                                                                                                                                                                                                                                                                                                                                                                                                                                                                                                                                                                                                                                                                                                                                                                                                                                                                               | (4-ethyl-2-methoxyphenyl)oxindanes acid                      | -0,181861041                    | 0,036416504 | 0,149114436       |
| 231,0801554 | HMDB0060324, HMDB60324                                                                                                                                                                                                                                                                                                                                                                                                                                                                                                                                                                                                                                                                                                                                                                                                                                                                                                                                    | 1-Methoxypyrene                                              | 0,129706132                     | 0,738241076 | 0,867582504       |
| 231,093583  | HMDB0032981, HMDB32981                                                                                                                                                                                                                                                                                                                                                                                                                                                                                                                                                                                                                                                                                                                                                                                                                                                                                                                                    | 2,3-Diphenylpyrazine                                         | -0,036807378                    | 0,986181584 | 0,99357422        |
| 232,0281433 | HMDB0004148, HMDB0006275, HMDB04148, HMDB06275                                                                                                                                                                                                                                                                                                                                                                                                                                                                                                                                                                                                                                                                                                                                                                                                                                                                                                            | Dopamine 4-sulfate                                           | 0,205840351                     | 0,295840559 | 0,555441671       |
| 232,0428928 | HMDB0038592, HMDB38592                                                                                                                                                                                                                                                                                                                                                                                                                                                                                                                                                                                                                                                                                                                                                                                                                                                                                                                                    | Brassicinal B                                                | 0,127567217                     | 0,320990046 | 0,583131918       |
| 232,0833197 | HMDB0035923, HMDB35923                                                                                                                                                                                                                                                                                                                                                                                                                                                                                                                                                                                                                                                                                                                                                                                                                                                                                                                                    | Hirsutin                                                     | 0,087064836                     | 0,955663727 | 0,981716758       |
| 232,978367  | HMDB0014026, HMDB14026                                                                                                                                                                                                                                                                                                                                                                                                                                                                                                                                                                                                                                                                                                                                                                                                                                                                                                                                    | p-Chlorobenzene sulfonyl urea                                | 0,146287931                     | 0,375779501 | 0,628197929       |
| 233,0103898 | HMDB0034453, HMDB34453                                                                                                                                                                                                                                                                                                                                                                                                                                                                                                                                                                                                                                                                                                                                                                                                                                                                                                                                    | 4-[2,2"-Bithiophen-5-yl]-3-butyln-1-ol                       | 0,031878051                     | 0,06117565  | 0,203607508       |
| 233,0777455 | HMDB0011169, HMDB0028763, HMDB0028828, HMDB0029057, HMDB0029158, HMDB11169, HMDB28763, HMDB28828, HMDB29057, HMDB29158                                                                                                                                                                                                                                                                                                                                                                                                                                                                                                                                                                                                                                                                                                                                                                                                                                    | L-beta-aspartyl-L-threonine                                  | -0,035882766                    | 0,222310142 | 0,472815717       |
| 233,1536328 | HMDB0030016, HMDB0031349, HMDB0032081, HMDB0033252, HMDB0033253, HMDB0033960, HMDB0034562, HMDB0034742, HMDB0034956, HMDB0035202, HMDB0035407, HMDB0035408, HMDB0035413, HMDB0035639, HMDB0035794, HMDB0035869, HMDB0035889, HMDB0035935, HMDB0036035, HMDB0036390, HMDB0036392, HMDB0036427, HMDB0036449, HMDB0036466, HMDB0036647, HMDB0037038, HMDB0037391, HMDB0037640, HMDB0037710, HMDB0037710, HMDB0037710, HMDB0038190, HMDB0038198, HMDB0038698, HMDB0038795, HMDB0038796, HMDB0038914, HMDB0039621, HMDB41036, HMDB30016, HMDB31349, HMDB32081, HMDB33252, HMDB33253, HMDB33960, HMDB34562, HMDB34742, HMDB34956, HMDB35202, HMDB35407, HMDB35408, HMDB35413, HMDB35639, HMDB35794, HMDB35869, HMDB35889, HMDB35935, HMDB36035, HMDB36390, HMDB36392, HMDB36427, HMDB36449, HMDB36466, HMDB36647, HMDB37038, HMDB37391, HMDB37640, HMDB37710, HMDB37739, HMDB38190, HMDB38198, HMDB38698, HMDB38795, HMDB38796, HMDB38914, HMDB39621, HMDB41036 | Valeric acid                                                 | 0,101630164                     | 0,392265604 | 0,641527233       |
| 234,1122514 | HMDB0033610, HMDB33610                                                                                                                                                                                                                                                                                                                                                                                                                                                                                                                                                                                                                                                                                                                                                                                                                                                                                                                                    | Pandamarilactam 3x                                           | 0,511034006                     | 0,225755878 | 0,473219052       |
| 235,0224504 | HMDB0015021, HMDB15021                                                                                                                                                                                                                                                                                                                                                                                                                                                                                                                                                                                                                                                                                                                                                                                                                                                                                                                                    | Isosorbide Dinitrate                                         | -0,004241999                    | 0,582476089 | 0,762836399       |
| 235,0302194 | HMDB0033062, HMDB0036372, HMDB0036373, HMDB0038968, HMDB33062, HMDB36372, HMDB36373, HMDB38968                                                                                                                                                                                                                                                                                                                                                                                                                                                                                                                                                                                                                                                                                                                                                                                                                                                            | 2-Propenyl 1-(2-propenylsulfinyl)propyl disulfide            | 0,039022029                     | 0,665118366 | 0,822671228       |
| 235,1688421 | HMDB0002352, HMDB0030891, HMDB0030916, HMDB0030920, HMDB0031348, HMDB0032048, HMDB0032292, HMDB0032681, HMDB0033083, HMDB0033104, HMDB0034714, HMDB0034722, HMDB0035032, HMDB0035040, HMDB0035127, HMDB0035147, HMDB0035301, HMDB0035648, HMDB0035827, HMDB0036446, HMDB0036549, HMDB0036668, HMDB0036680, HMDB0036687, HMDB0037393, HMDB0037906, HMDB0038027, HMDB0038122, HMDB0038144, HMDB0038178, HMDB0039525, HMDB0039688, HMDB0040712, HMDB02352, HMDB30891, HMDB30916, HMDB30920, HMDB31348, HMDB32048, HMDB32292, HMDB32681, HMDB33083, HMDB33104, HMDB34714, HMDB34722, HMDB35032, HMDB35040, HMDB35127, HMDB35147, HMDB35301, HMDB35648, HMDB35827, HMDB36446, HMDB36549, HMDB36668, HMDB36680, HMDB36687, HMDB37393, HMDB37906, HMDB38027, HMDB38122, HMDB38144, HMDB38178, HMDB39525, HMDB39688, HMDB40712                                                                                                                                    | Capsidiol                                                    | 0,05519752                      | 0,741198383 | 0,869885586       |
| 237,1117307 | HMDB0033191, HMDB0034046, HMDB33191, HMDB34046                                                                                                                                                                                                                                                                                                                                                                                                                                                                                                                                                                                                                                                                                                                                                                                                                                                                                                            | 2,2,4,4,-Tetramethyl-6-(1-oxopropyl)-1,3,5-cyclohexanetrione | -0,104426493                    | 0,330362247 | 0,594134913       |
| 237,1489524 | HMDB0038256, HMDB0112083, HMDB38256                                                                                                                                                                                                                                                                                                                                                                                                                                                                                                                                                                                                                                                                                                                                                                                                                                                                                                                       | Geranyl acetoacetate                                         | -0,193556533                    | 0,172747088 | 0,408226182       |

Supplementary Appendix  
MIRA Study

| m/z         | HMDB ID alternatives                                                                                                                                                                                                                                                                                                                                                                                                                                                                                                                                                                                                                                                                                                                           | Suggested annotation                      | Comparison [vegan] - [omnivore] |             |                   |
|-------------|------------------------------------------------------------------------------------------------------------------------------------------------------------------------------------------------------------------------------------------------------------------------------------------------------------------------------------------------------------------------------------------------------------------------------------------------------------------------------------------------------------------------------------------------------------------------------------------------------------------------------------------------------------------------------------------------------------------------------------------------|-------------------------------------------|---------------------------------|-------------|-------------------|
|             |                                                                                                                                                                                                                                                                                                                                                                                                                                                                                                                                                                                                                                                                                                                                                |                                           | Fold Change (log2)              | p-value     | p-value (BH adj.) |
| 237,1852064 | HMDB0029350, HMDB0030428, HMDB0031383, HMDB0031384, HMDB0032054, HMDB0032209, HMDB0032291, HMDB0032343, HMDB0033228, HMDB0034673, HMDB0035287, HMDB0035887, HMDB0036032, HMDB0036730, HMDB0036880, HMDB0037195, HMDB0037279, HMDB0037284, HMDB0038136, HMDB0038138, HMDB0038196, HMDB0038197, HMDB0038247, HMDB0038248, HMDB0038250, HMDB0039130, HMDB0039745, HMDB0040273, HMDB0040281, HMDB0041589, HMDB29350, HMDB30428, HMDB31383, HMDB31384, HMDB32054, HMDB32209, HMDB32291, HMDB32343, HMDB33228, HMDB34673, HMDB35287, HMDB35887, HMDB36032, HMDB36730, HMDB36880, HMDB37195, HMDB37279, HMDB37284, HMDB38136, HMDB38138, HMDB38196, HMDB38197, HMDB38247, HMDB38248, HMDB38250, HMDB39130, HMDB39745, HMDB40273, HMDB40281, HMDB41589 | Geranyl<br>3-methylbutanoate              | 0,126383091                     | 0,637455495 | 0,801639866       |
| 237,2214887 | HMDB0034181, HMDB0037544, HMDB0060482, HMDB34181, HMDB37544, HMDB60482                                                                                                                                                                                                                                                                                                                                                                                                                                                                                                                                                                                                                                                                         | 3-<br>Methylcyclopentadecanoic acid       | 0,022547702                     | 0,691758606 | 0,843655252       |
| 238,0532736 | HMDB0042011, HMDB42011                                                                                                                                                                                                                                                                                                                                                                                                                                                                                                                                                                                                                                                                                                                         | S-Phenylmercaptopuric acid                | -0,07410097                     | 0,986880991 | 0,99357422        |
| 238,0918056 | HMDB0032293, HMDB32293                                                                                                                                                                                                                                                                                                                                                                                                                                                                                                                                                                                                                                                                                                                         | N-Gluconyl ethanolamine                   | -0,061297317                    | 0,907941892 | 0,961999186       |
| 239,0585308 | HMDB0033071, HMDB33071                                                                                                                                                                                                                                                                                                                                                                                                                                                                                                                                                                                                                                                                                                                         | Propyl 1-(propylsulfanyl)propyl disulfide | -0,1222663                      | 0,1443667   | 0,368092874       |
| 239,0913802 | HMDB0030254, HMDB0038627, HMDB0041756, HMDB0061112, HMDB0062776, HMDB0125802, HMDB0125804, HMDB0127748, HMDB0127826, HMDB0128672, HMDB0128705, HMDB0128721, HMDB0142074, HMDB30254, HMDB38627, HMDB41756, HMDB61112, HMDB62776                                                                                                                                                                                                                                                                                                                                                                                                                                                                                                                 | 3-(3,4,5-Trimethoxyphenyl)propionic acid  | -2,767720341                    | 0,002122924 | 0,019693506       |
| 239,1640845 | HMDB0032369, HMDB32369                                                                                                                                                                                                                                                                                                                                                                                                                                                                                                                                                                                                                                                                                                                         | L-Menthyl acetoacetate                    | 0,401587397                     | 0,334030168 | 0,594134913       |
| 239,200383  | HMDB0029765, HMDB0032347, HMDB0034455, HMDB0036426, HMDB0037190, HMDB0037211, HMDB0037229, HMDB0038954, HMDB0039715, HMDB0040997, HMDB29765, HMDB32347, HMDB34455, HMDB36426, HMDB37190, HMDB37211, HMDB37229, HMDB38954, HMDB39715, HMDB40997                                                                                                                                                                                                                                                                                                                                                                                                                                                                                                 | C15:1                                     | -0,526772191                    | 0,052181088 | 0,185722077       |
| 239,2363498 | HMDB0001551, HMDB0031052, HMDB01551, HMDB31052                                                                                                                                                                                                                                                                                                                                                                                                                                                                                                                                                                                                                                                                                                 | Palmitaldehyde                            | -0,272328087                    | 0,005341596 | 0,038815596       |
| 241,1795381 | HMDB0010730, HMDB0030982, HMDB0032370, HMDB10730, HMDB30982, HMDB32370                                                                                                                                                                                                                                                                                                                                                                                                                                                                                                                                                                                                                                                                         | 3-Oxotetradecanoic acid                   | 0,217736352                     | 0,738098776 | 0,867582504       |
| 242,0779258 | HMDB0000089, HMDB00089, HMDB0015122, HMDB0060478, HMDB15122, HMDB30167, HMDB60478                                                                                                                                                                                                                                                                                                                                                                                                                                                                                                                                                                                                                                                              | Cytidine                                  | 0,022250112                     | 0,277294871 | 0,542154994       |
| 242,1416775 | HMDB0002366, HMDB02366                                                                                                                                                                                                                                                                                                                                                                                                                                                                                                                                                                                                                                                                                                                         | Tiglylcarnitine                           | -0,101229997                    | 0,796012143 | 0,897959364       |
| 242,1750276 | HMDB0013286, HMDB13286                                                                                                                                                                                                                                                                                                                                                                                                                                                                                                                                                                                                                                                                                                                         | N-Undecanoylglycine                       | -0,418657584                    | 0,505761522 | 0,726563505       |
| 243,0317906 | HMDB0059983, HMDB0133637, HMDB0133640, HMDB0133642, HMDB0133644, HMDB0133646, HMDB0133648, HMDB0133649, HMDB0133651, HMDB0133652, HMDB0133656, HMDB0133658, HMDB0133734, HMDB0133735, HMDB0133737, HMDB0133738, HMDB0133740, HMDB0133741, HMDB0133745, HMDB0133766, HMDB0133768, HMDB0133770, HMDB0133772, HMDB0133774, HMDB0135245, HMDB0135653, HMDB59983                                                                                                                                                                                                                                                                                                                                                                                    | 4-phenylbutanoic acid-O-sulphate          | -0,025899213                    | 0,428114229 | 0,666635014       |
| 243,2183893 | HMDB0001186, HMDB01186                                                                                                                                                                                                                                                                                                                                                                                                                                                                                                                                                                                                                                                                                                                         | N1-Acetylspermine                         | -0,512564243                    | 8,60815E-06 | 0,000227464       |
| 244,1365095 | HMDB0059773, HMDB59773                                                                                                                                                                                                                                                                                                                                                                                                                                                                                                                                                                                                                                                                                                                         | S-3-oxodecanoyl cysteamine                | 0,072683726                     | 0,598157494 | 0,770448058       |
| 245,0124571 | HMDB0094710, HMDB0125171, HMDB0128001, HMDB0130016, HMDB0134064, HMDB0134069, HMDB0134071, HMDB0134074, HMDB0134080, HMDB0134083, HMDB94710                                                                                                                                                                                                                                                                                                                                                                                                                                                                                                                                                                                                    | 3-[3-(Sulfoxy)phenyl]propanoic acid       | 0,080025474                     | 0,603269668 | 0,773604634       |
| 245,0463487 | HMDB0034312, HMDB0041525, HMDB34312, HMDB41525                                                                                                                                                                                                                                                                                                                                                                                                                                                                                                                                                                                                                                                                                                 | Isopimpinellin                            | 0,347917127                     | 0,202767503 | 0,446844947       |
| 245,0463487 | HMDB0032077, HMDB32077                                                                                                                                                                                                                                                                                                                                                                                                                                                                                                                                                                                                                                                                                                                         | Dibenzyl disulfide                        | 0,347917127                     | 0,202767503 | 0,446844947       |
| 245,0764161 | HMDB0000497, HMDB0011160, HMDB0028754, HMDB00497, HMDB11160, HMDB28754                                                                                                                                                                                                                                                                                                                                                                                                                                                                                                                                                                                                                                                                         | 5,6-Dihydrouridine                        | 0,104885502                     | 0,084434643 | 0,253013775       |
| 245,1132113 | HMDB0011166, HMDB0011172, HMDB0028756, HMDB0028757, HMDB0028832, HMDB0028903, HMDB0028925, HMDB0029162, HMDB0059717, HMDB11166, HMDB11172, HMDB28756, HMDB28757, HMDB28832, HMDB28903, HMDB28925, HMDB29162, HMDB59717                                                                                                                                                                                                                                                                                                                                                                                                                                                                                                                         | L-beta-aspartyl-L-leucine                 | 0,005254942                     | 0,759216889 | 0,878033325       |
| 245,1385788 | HMDB0000413, HMDB0031696, HMDB00413, HMDB31696                                                                                                                                                                                                                                                                                                                                                                                                                                                                                                                                                                                                                                                                                                 | 3-Hydroxydodecanedioic acid               | 0,227204062                     | 0,237474655 | 0,490705922       |
| 245,1531152 | HMDB0036207, HMDB0037705, HMDB0041250, HMDB36207, HMDB37705, HMDB41250                                                                                                                                                                                                                                                                                                                                                                                                                                                                                                                                                                                                                                                                         | alpha-Amylcinnamyl acetate                | 0,190672271                     | 0,572303143 | 0,762286527       |
| 246,0741803 | HMDB0028727, HMDB0028748, HMDB28727, HMDB28748                                                                                                                                                                                                                                                                                                                                                                                                                                                                                                                                                                                                                                                                                                 | Asparaginy-Aspartate                      | -0,021066479                    | 0,792813954 | 0,897391148       |
| 246,1099574 | HMDB0028807, HMDB0029059, HMDB0029075, HMDB28807, HMDB29059, HMDB29075                                                                                                                                                                                                                                                                                                                                                                                                                                                                                                                                                                                                                                                                         | Glutaminythreonine                        | -0,124877052                    | 0,530142221 | 0,744418706       |
| 246,9916775 | HMDB0041788, HMDB0125151, HMDB0140929, HMDB41788                                                                                                                                                                                                                                                                                                                                                                                                                                                                                                                                                                                                                                                                                               | Vanillic acid 4-sulfate                   | 0,20552292                      | 0,111514827 | 0,301765788       |
| 247,0297892 | HMDB0029229, HMDB0128019, HMDB29229                                                                                                                                                                                                                                                                                                                                                                                                                                                                                                                                                                                                                                                                                                            | 4-Methoxyphenylethanol sulfate            | 0,004140001                     | 0,713181035 | 0,857784638       |
| 247,0581511 | HMDB0011163, HMDB0028749, HMDB11163, HMDB28749                                                                                                                                                                                                                                                                                                                                                                                                                                                                                                                                                                                                                                                                                                 | L-beta-aspartyl-L-aspartic acid           | 0,056940577                     | 0,284899054 | 0,547206994       |
| 247,1125981 | HMDB0028986, HMDB0029133, HMDB28986, HMDB29133                                                                                                                                                                                                                                                                                                                                                                                                                                                                                                                                                                                                                                                                                                 | Methionyl-Valine                          | 0,07008383                      | 0,091537258 | 0,266958156       |
| 247,1690892 | HMDB0032228, HMDB0036221, HMDB0036640, HMDB0037713, HMDB0037719, HMDB32228, HMDB36221, HMDB36640, HMDB37713, HMDB37719                                                                                                                                                                                                                                                                                                                                                                                                                                                                                                                                                                                                                         | C16:4                                     | 0,064551039                     | 0,482286171 | 0,709204926       |
| 248,0229573 | HMDB0002062, HMDB02062, HMDB06346                                                                                                                                                                                                                                                                                                                                                                                                                                                                                                                                                                                                                                                                                                              | Norepinephrine sulfate                    | 0,296794647                     | 0,127302246 | 0,33235796        |
| 248,0486521 | HMDB0015028, HMDB15028                                                                                                                                                                                                                                                                                                                                                                                                                                                                                                                                                                                                                                                                                                                         | Sulfapyridine                             | 0,060899575                     | 0,855945277 | 0,93241486        |

Supplementary Appendix  
MIRA Study

| m/z         | HMDB ID alternatives                                                                                                                                                                                                                                                                                                                                                                                                                                                                                                                                                    | Suggested annotation                                        | Comparison [vegan] - [omnivore] |             |                   |
|-------------|-------------------------------------------------------------------------------------------------------------------------------------------------------------------------------------------------------------------------------------------------------------------------------------------------------------------------------------------------------------------------------------------------------------------------------------------------------------------------------------------------------------------------------------------------------------------------|-------------------------------------------------------------|---------------------------------|-------------|-------------------|
|             |                                                                                                                                                                                                                                                                                                                                                                                                                                                                                                                                                                         |                                                             | Fold Change (log2)              | p-value     | p-value (BH adj.) |
| 248,0793668 | HMDB0001526, HMDB0006878, HMDB01526, HMDB06878, HMDB06951                                                                                                                                                                                                                                                                                                                                                                                                                                                                                                               | S-Acetyldihydroipoamide                                     | -0,147754827                    | 0,857565043 | 0,93241486        |
| 249,1117246 | HMDB0002012, HMDB0032116, HMDB0038804, HMDB0094669, HMDB0133182, HMDB0134155, HMDB0135907, HMDB02012, HMDB32116, HMDB38804, HMDB94669                                                                                                                                                                                                                                                                                                                                                                                                                                   | Ubiquinone-1                                                | 0,279832045                     | 0,220499849 | 0,470451297       |
| 249,1489996 | HMDB0015371, HMDB0030917, HMDB0031901, HMDB0034721, HMDB0035117, HMDB0035137, HMDB0035148, HMDB0035358, HMDB0035760, HMDB0035798, HMDB0036036, HMDB0036037, HMDB0036550, HMDB0036563, HMDB0036664, HMDB0037064, HMDB0037529, HMDB0037559, HMDB0039156, HMDB0039635, HMDB0039644, HMDB0040754, HMDB0061839, HMDB115371, HMDB30917, HMDB31901, HMDB34721, HMDB35117, HMDB35137, HMDB35148, HMDB35358, HMDB35760, HMDB35798, HMDB36036, HMDB36037, HMDB36550, HMDB36563, HMDB36664, HMDB37064, HMDB37529, HMDB37559, HMDB39156, HMDB39635, HMDB39644, HMDB40754, HMDB61839 | Gemfibrozil                                                 | 0,00326497                      | 0,946465924 | 0,977865267       |
| 249,1850046 | HMDB0035293, HMDB0037631, HMDB0037712, HMDB35293, HMDB37631, HMDB37712                                                                                                                                                                                                                                                                                                                                                                                                                                                                                                  | C16:3                                                       | 0,415451301                     | 0,16649598  | 0,396678946       |
| 251,046557  | HMDB0030228, HMDB30228                                                                                                                                                                                                                                                                                                                                                                                                                                                                                                                                                  | Nigakinone                                                  | 0,172914718                     | 0,383231745 | 0,636331303       |
| 251,076671  | HMDB0000071, HMDB00071, HMDB0029956, HMDB29956                                                                                                                                                                                                                                                                                                                                                                                                                                                                                                                          | Deoxyinosine                                                | 0,111481695                     | 0,591582982 | 0,766508708       |
| 251,1029212 | HMDB0013940, HMDB0013941, HMDB0028699, HMDB0029004, HMDB029046, HMDB0029098, HMDB113940, HMDB113941, HMDB28699, HMDB29004, HMDB29046, HMDB29098                                                                                                                                                                                                                                                                                                                                                                                                                         | 3"-Hydroxyhexobarbital                                      | 0,077500246                     | 0,578389079 | 0,762373662       |
| 251,1272357 | HMDB0033197, HMDB0036047, HMDB0059661, HMDB33197, HMDB36047, HMDB59661                                                                                                                                                                                                                                                                                                                                                                                                                                                                                                  | 2,2,4,4-Tetramethyl-6-(1-oxobutyl)-1,3,5-cyclohexanetrione  | 0,260656805                     | 0,059671948 | 0,201681933       |
| 253,0711585 | HMDB0029438, HMDB29438                                                                                                                                                                                                                                                                                                                                                                                                                                                                                                                                                  | L-Phosphoarginine                                           | 0,094197141                     | 0,36863915  | 0,624181241       |
| 253,0711585 | HMDB0128666, HMDB0128669, HMDB0128671, HMDB0128675, HMDB0137285, HMDB0142077                                                                                                                                                                                                                                                                                                                                                                                                                                                                                            | 3-(6,7-dimethoxy-2H-1,3-benzodioxol-5-yl)-3-hydroxypropanal | 0,094197141                     | 0,36863915  | 0,624181241       |
| 253,081893  | HMDB0029445, HMDB0060669, HMDB0060670, HMDB29445, HMDB60669, HMDB60670                                                                                                                                                                                                                                                                                                                                                                                                                                                                                                  | L-Agaridoxin                                                | 0,080129343                     | 0,567294628 | 0,762286527       |
| 253,0933971 | HMDB0006790, HMDB0038664, HMDB06790, HMDB06864, HMDB06934, HMDB38664                                                                                                                                                                                                                                                                                                                                                                                                                                                                                                    | Galactosylglycerol                                          | 0,002653569                     | 0,668742712 | 0,8259825         |
| 253,0933971 | HMDB0014789, HMDB14789                                                                                                                                                                                                                                                                                                                                                                                                                                                                                                                                                  | Dyphylline                                                  | 0,002653569                     | 0,668742712 | 0,8259825         |
| 253,1073672 | HMDB0032796, HMDB32796                                                                                                                                                                                                                                                                                                                                                                                                                                                                                                                                                  | Methyl 3-(2,3-dihydroxy-3-methylbutyl)-4-hydroxybenzoate    | -0,400523589                    | 0,066573507 | 0,214186619       |
| 253,1169635 | HMDB0014356, HMDB0029390, HMDB0029443, HMDB0033143, HMDB0037817, HMDB14356, HMDB29390, HMDB29443, HMDB33143, HMDB37817                                                                                                                                                                                                                                                                                                                                                                                                                                                  | Midodrine                                                   | -0,26349032                     | 0,038390841 | 0,15427103        |
| 253,1169635 | HMDB0013075, HMDB0028917, HMDB0028939, HMDB0029064, HMDB0029065, HMDB13075, HMDB28917, HMDB28939, HMDB29064, HMDB29065                                                                                                                                                                                                                                                                                                                                                                                                                                                  | Spermic acid 2                                              | -0,26349032                     | 0,038390841 | 0,15427103        |
| 253,2176881 | HMDB0002186, HMDB003229, HMDB0010735, HMDB0012328, HMDB0031053, HMDB0031145, HMDB0031711, HMDB0032638, HMDB0033791, HMDB0035877, HMDB0037647, HMDB0038958, HMDB0041422, HMDB02186, HMDB03229, HMDB10735, HMDB12328, HMDB31053, HMDB31145, HMDB31711, HMDB32638, HMDB33791, HMDB35877, HMDB37647, HMDB38958, HMDB41422, HMDB60082                                                                                                                                                                                                                                        | Hypogeic acid                                               | -0,681014006                    | 0,005632289 | 0,039929723       |
| 254,0801225 | HMDB0014608, HMDB0029322, HMDB0030215, HMDB0030320, HMDB0038639, HMDB0038640, HMDB0041996, HMDB14608, HMDB29322, HMDB30215, HMDB30320, HMDB38639, HMDB38640, HMDB41996                                                                                                                                                                                                                                                                                                                                                                                                  | Ketorolac                                                   | 0,020400845                     | 0,203437436 | 0,446844947       |
| 255,0651211 | HMDB0005760, HMDB0029462, HMDB0029519, HMDB0030808, HMDB0032577, HMDB0033904, HMDB0036457, HMDB0037316, HMDB0041647, HMDB0061744, HMDB0128077, HMDB0129959, HMDB0134575, HMDB0137512, HMDB0137518, HMDB0137526, HMDB0138504, HMDB0141337, HMDB05760, HMDB29462, HMDB29519, HMDB30808, HMDB32577, HMDB33904, HMDB36457, HMDB37316, HMDB41647, HMDB61744                                                                                                                                                                                                                  | Dihydrodaidzein                                             | -0,358349669                    | 0,019569267 | 0,099211632       |
| 255,0864577 | HMDB0141328, HMDB0141330, HMDB0142079, HMDB0142082                                                                                                                                                                                                                                                                                                                                                                                                                                                                                                                      | 3-hydroxy-3-(3,4,5-trimethoxyphenyl)propanoic acid          | -2,318594582                    | 0,006846086 | 0,045921436       |
| 257,0715552 | HMDB0028777, HMDB0028882, HMDB28777, HMDB28882                                                                                                                                                                                                                                                                                                                                                                                                                                                                                                                          | Cysteinyl-Histidine                                         | 0,002930821                     | 0,59371383  | 0,766762104       |
| 258,0727347 | HMDB0041934, HMDB41934                                                                                                                                                                                                                                                                                                                                                                                                                                                                                                                                                  | Mizoribine                                                  | -0,08312432                     | 0,901270768 | 0,960767861       |
| 258,1214855 | HMDB0028906, HMDB0028928, HMDB28906, HMDB28928                                                                                                                                                                                                                                                                                                                                                                                                                                                                                                                          | Isoleucyl-Glutamate                                         | 0,068336227                     | 0,78198661  | 0,889038232       |
| 259,1447317 | HMDB0033481, HMDB0094673, HMDB33481, HMDB94673                                                                                                                                                                                                                                                                                                                                                                                                                                                                                                                          | Baptifoline                                                 | 0,180343475                     | 0,555173939 | 0,757470764       |
| 260,0214477 | HMDB0062550, HMDB62550                                                                                                                                                                                                                                                                                                                                                                                                                                                                                                                                                  | 2-Methoxyacetaminophen sulfate                              | 0,134829996                     | 0,576085804 | 0,762286527       |
| 261,0725511 | HMDB0011164, HMDB0028815, HMDB0029145, HMDB0030413, HMDB0030419, HMDB11164, HMDB28815, HMDB29145, HMDB30413, HMDB30419                                                                                                                                                                                                                                                                                                                                                                                                                                                  | L-beta-aspartyl-L-glutamic acid                             | -0,654641624                    | 0,001616999 | 0,016988231       |
| 261,1336776 | HMDB0031897, HMDB31897                                                                                                                                                                                                                                                                                                                                                                                                                                                                                                                                                  | Phaseolic acid                                              | 0,072147814                     | 0,153645053 | 0,380720112       |
| 263,1029146 | HMDB0004259, HMDB0006344, HMDB0061136, HMDB04259, HMDB06344, HMDB61136                                                                                                                                                                                                                                                                                                                                                                                                                                                                                                  | Acetyl-N-formyl-5-methoxykynurenamine                       | -0,285068356                    | 0,536462338 | 0,748472253       |
| 263,2002728 | HMDB0035910, HMDB0036153, HMDB0037218, HMDB0037224, HMDB0037273, HMDB0039630, HMDB0037273, HMDB0039630                                                                                                                                                                                                                                                                                                                                                                                                                                                                  | Cedryl acetate                                              | 0,459182578                     | 0,027404928 | 0,123819156       |
| 263,2358303 | HMDB0037543, HMDB37543                                                                                                                                                                                                                                                                                                                                                                                                                                                                                                                                                  | (±)-(Z)-2-(5-Tetraecenyl)cyclobutanol                       | 0,111890089                     | 0,441637252 | 0,679292816       |
| 264,1061255 | HMDB0000235, HMDB00235                                                                                                                                                                                                                                                                                                                                                                                                                                                                                                                                                  | Thiamine                                                    | -0,246049542                    | 0,54035623  | 0,751710534       |

Supplementary Appendix  
MIRA Study

| m/z         | HMDB ID alternatives                                                                                                                                                                                                                                                                                                                                                                                                                                                                                                                                                                                               | Suggested annotation                                       | Comparison [vegan] - [omnivore] |             |                   |
|-------------|--------------------------------------------------------------------------------------------------------------------------------------------------------------------------------------------------------------------------------------------------------------------------------------------------------------------------------------------------------------------------------------------------------------------------------------------------------------------------------------------------------------------------------------------------------------------------------------------------------------------|------------------------------------------------------------|---------------------------------|-------------|-------------------|
|             |                                                                                                                                                                                                                                                                                                                                                                                                                                                                                                                                                                                                                    |                                                            | Fold Change (log2)              | p-value     | p-value (BH adj.) |
| 265,1076047 | HMDB0040891, HMDB0041582, HMDB0125455, HMDB0133195, HMDB0133196, HMDB0133197, HMDB0133198, HMDB40891, HMDB41582                                                                                                                                                                                                                                                                                                                                                                                                                                                                                                    | 3",4",5"-Trimethoxycinnamyl alcohol acetate                | 0,187580065                     | 5,99276E-09 | 6,53211E-07       |
| 267,0720348 | HMDB0000425, HMDB00425                                                                                                                                                                                                                                                                                                                                                                                                                                                                                                                                                                                             | 3-Deoxy-D-glycero-D-galacto-2-nonulosonic acid             | -0,164664522                    | 0,871106338 | 0,943931618       |
| 267,1223513 | HMDB0038935, HMDB0061643, HMDB38935, HMDB61643                                                                                                                                                                                                                                                                                                                                                                                                                                                                                                                                                                     | Kamahine C                                                 | -0,328891832                    | 0,008085103 | 0,052613508       |
| 267,1378165 | HMDB0014400, HMDB14400                                                                                                                                                                                                                                                                                                                                                                                                                                                                                                                                                                                             | Diethylstilbestrol                                         | -0,215804781                    | 0,764784499 | 0,882132385       |
| 267,2321597 | HMDB0030997, HMDB0031046, HMDB0040888, HMDB0060038, HMDB0061858, HMDB0062437, HMDB31046, HMDB40888, HMDB60038, HMDB61858, HMDB62437                                                                                                                                                                                                                                                                                                                                                                                                                                                                                | Cyclohexaneundecanoic acid                                 | -1,281164927                    | 2,99807E-07 | 1,53783E-05       |
| 269,0874276 | HMDB0029955, HMDB29955                                                                                                                                                                                                                                                                                                                                                                                                                                                                                                                                                                                             | D-erythro-L-galacto-Nonulose                               | -0,034645736                    | 0,280756564 | 0,546386287       |
| 269,210185  | HMDB0010733, HMDB0030972, HMDB0030973, HMDB0030978, HMDB10733, HMDB30972, HMDB30973, HMDB30978                                                                                                                                                                                                                                                                                                                                                                                                                                                                                                                     | 3-Oxohexadecanoic acid                                     | 0,424792807                     | 0,921179077 | 0,966761787       |
| 269,2476288 | HMDB0002259, HMDB0031067, HMDB0034131, HMDB0037372, HMDB0040392, HMDB0040598, HMDB0059870, HMDB0061859, HMDB02259, HMDB31067, HMDB34131, HMDB37372, HMDB40392, HMDB40598, HMDB59870, HMDB61859                                                                                                                                                                                                                                                                                                                                                                                                                     | Heptadecanoic acid                                         | -1,179016537                    | 3,35421E-10 | 2,08818E-07       |
| 270,1504214 | HMDB0060766, HMDB60766                                                                                                                                                                                                                                                                                                                                                                                                                                                                                                                                                                                             | 4-Hydroxyatomoxetine                                       | 0,20619707                      | 0,067106545 | 0,214347644       |
| 270,2067119 | HMDB0013317, HMDB13317                                                                                                                                                                                                                                                                                                                                                                                                                                                                                                                                                                                             | Tridecanoylglycine                                         | 1,008844129                     | 0,371410468 | 0,626440867       |
| 270,9908742 | HMDB0128634, HMDB0128636, HMDB0128638                                                                                                                                                                                                                                                                                                                                                                                                                                                                                                                                                                              | [(7-hydroxy-1-oxo-1H-isochromen-3-yl)methoxy]sulfonic acid | -0,186893854                    | 0,223772224 | 0,473219052       |
| 271,0610589 | HMDB0002670, HMDB0005897, HMDB0029631, HMDB0030873, HMDB0031824, HMDB0033308, HMDB0033928, HMDB0034002, HMDB0034105, HMDB0037254, HMDB0038549, HMDB0041656, HMDB0041698, HMDB0041704, HMDB0125364, HMDB0125365, HMDB0126021, HMDB0126022, HMDB0128074, HMDB0128075, HMDB0129341, HMDB0129965, HMDB0130173, HMDB0130182, HMDB0133545, HMDB0133993, HMDB0133999, HMDB0134891, HMDB0134892, HMDB0137525, HMDB0137528, HMDB0137531, HMDB0138088, HMDB0138618, HMDB02670, HMDB05897, HMDB29631, HMDB30873, HMDB31824, HMDB33308, HMDB33928, HMDB34002, HMDB34105, HMDB37254, HMDB38549, HMDB41656, HMDB41698, HMDB41704 | Naringenin                                                 | -0,186332577                    | 0,917569438 | 0,96534228        |
| 271,1909263 | HMDB0035918, HMDB35918                                                                                                                                                                                                                                                                                                                                                                                                                                                                                                                                                                                             | 7(14)-Bisabolene-2,3,10,11-tetrol                          | 0,124541368                     | 0,934411963 | 0,975689772       |
| 271,2260028 | HMDB0010734, HMDB0031057, HMDB0061658, HMDB0112184, HMDB0112185, HMDB0112186, HMDB0112187, HMDB0112188, HMDB0112189, HMDB0112190, HMDB0112191, HMDB0112192, HMDB10734, HMDB31057, HMDB61658                                                                                                                                                                                                                                                                                                                                                                                                                        | (R)-3-Hydroxy-hexadecanoic acid                            | 0,026248531                     | 0,903303485 | 0,961759022       |
| 272,1283697 | HMDB0030187, HMDB0038834, HMDB30187, HMDB38834                                                                                                                                                                                                                                                                                                                                                                                                                                                                                                                                                                     | (E,E)-Piperlonguminine                                     | 0,079260893                     | 0,748768646 | 0,872880287       |
| 272,1717524 | HMDB0028722, HMDB0029121, HMDB28722, HMDB29121                                                                                                                                                                                                                                                                                                                                                                                                                                                                                                                                                                     | Arginyl-Valine                                             | -0,096376426                    | 0,31929356  | 0,583131918       |
| 272,1877682 | HMDB0013238, HMDB13238                                                                                                                                                                                                                                                                                                                                                                                                                                                                                                                                                                                             | Heptanoylcarnitine                                         | 0,13319134                      | 0,807748022 | 0,905342256       |
| 273,0056767 | HMDB0029200, HMDB0041748, HMDB0127955, HMDB0131141, HMDB29200, HMDB41748                                                                                                                                                                                                                                                                                                                                                                                                                                                                                                                                           | Ferulic acid 4-sulfate                                     | 0,292740786                     | 0,119872456 | 0,317716661       |
| 273,0439168 | HMDB0059981, HMDB0126242, HMDB0126373, HMDB0133253, HMDB0133255, HMDB0133259, HMDB0135676, HMDB0135698, HMDB0135699, HMDB59981                                                                                                                                                                                                                                                                                                                                                                                                                                                                                     | 4-Hydroxy-5-(phenyl)-valeric acid-O-sulphate               | 0,20051331                      | 0,024897401 | 0,11609911        |
| 273,0965026 | HMDB0028833, HMDB28833                                                                                                                                                                                                                                                                                                                                                                                                                                                                                                                                                                                             | Glutamyl-Gamma-glutamate                                   | 0,212537094                     | 0,830309841 | 0,919098001       |
| 273,1697661 | HMDB0000394, HMDB00394                                                                                                                                                                                                                                                                                                                                                                                                                                                                                                                                                                                             | 3-Hydroxytetradecanedioic acid                             | 0,194957878                     | 0,510621718 | 0,729937931       |
| 274,1040505 | HMDB0005766, HMDB0011738, HMDB0028796, HMDB0028817, HMDB0029147, HMDB05766, HMDB11738, HMDB28796, HMDB28817, HMDB29147                                                                                                                                                                                                                                                                                                                                                                                                                                                                                             | Norophthalmic acid                                         | 0,13906121                      | 0,964017197 | 0,984003393       |
| 274,1402368 | HMDB0003869, HMDB004207, HMDB0028824, HMDB0029154, HMDB03869, HMDB04207, HMDB28824, HMDB29154                                                                                                                                                                                                                                                                                                                                                                                                                                                                                                                      | Epsilon-(gamma-Glutamyl)-lysine                            | 0,276349956                     | 0,98942505  | 0,99357422        |
| 275,0190702 | HMDB0034454, HMDB34454                                                                                                                                                                                                                                                                                                                                                                                                                                                                                                                                                                                             | 5-(4-Acetoxy-1-butynyl)-2,2"-bithiophene                   | 0,095815872                     | 0,56743931  | 0,762286527       |
| 275,087692  | HMDB0011737, HMDB0028818, HMDB0029148, HMDB0042036, HMDB11737, HMDB28818, HMDB29148, HMDB42036                                                                                                                                                                                                                                                                                                                                                                                                                                                                                                                     | gamma-Glutamylglutamic acid                                | -0,002177585                    | 0,585330377 | 0,762941837       |
| 275,1015421 | HMDB0011106, HMDB11106                                                                                                                                                                                                                                                                                                                                                                                                                                                                                                                                                                                             | 5-Amino-6-ribitylamino uracil                              | 0,002876403                     | 0,582625048 | 0,762836399       |
| 275,1665717 | HMDB0015586, HMDB0031463, HMDB0038938, HMDB0038994, HMDB0040375, HMDB0041201, HMDB0137236, HMDB0137237, HMDB15586, HMDB31463, HMDB38938, HMDB38994, HMDB40375, HMDB41201                                                                                                                                                                                                                                                                                                                                                                                                                                           | Cyclandelate                                               | -0,282522863                    | 0,470093611 | 0,700188213       |
| 275,2001286 | HMDB0002697, HMDB0004590, HMDB0005886, HMDB0006547, HMDB0032464, HMDB0032672, HMDB0034382, HMDB0062677, HMDB02697, HMDB04590, HMDB05886, HMDB06547, HMDB32464, HMDB32672, HMDB34382, HMDB62677                                                                                                                                                                                                                                                                                                                                                                                                                     | 19-Norandrosterone                                         | 0,421104095                     | 0,261324637 | 0,51907764        |
| 275,2363095 | HMDB0005830, HMDB05830                                                                                                                                                                                                                                                                                                                                                                                                                                                                                                                                                                                             | 5a-Androstan-3b-ol                                         | 0,61343957                      | 1,47855E-06 | 6,06903E-05       |
| 276,019292  | HMDB0002028, HMDB02028                                                                                                                                                                                                                                                                                                                                                                                                                                                                                                                                                                                             | DOPA sulfate                                               | 0,097948316                     | 0,910751085 | 0,962636298       |

Supplementary Appendix  
MIRA Study

| m/z         | HMDB ID alternatives                                                                                                                                                                                                              | Suggested annotation                                                             | Comparison [vegan] - [omnivore] |             |                   |
|-------------|-----------------------------------------------------------------------------------------------------------------------------------------------------------------------------------------------------------------------------------|----------------------------------------------------------------------------------|---------------------------------|-------------|-------------------|
|             |                                                                                                                                                                                                                                   |                                                                                  | Fold Change (log2)              | p-value     | p-value (BH adj.) |
| 276,0427675 | HMDB0060008, HMDB0060009, HMDB0060010, HMDB60008, HMDB60009, HMDB60010                                                                                                                                                            | N-(2-hydroxymethyl-3-chlorophenyl)anthranilic acid                               | -0,005254267                    | 0,50116533  | 0,722211629       |
| 276,1020823 | HMDB0028803, HMDB0028971, HMDB0028987, HMDB28803, HMDB28971, HMDB28987                                                                                                                                                            | Glutaminylmethionine                                                             | 0,024932305                     | 0,876569138 | 0,948347752       |
| 276,1020823 | HMDB0033355, HMDB0034110, HMDB33355, HMDB34110                                                                                                                                                                                    | Dehydroaporphine                                                                 | 0,024932305                     | 0,876569138 | 0,948347752       |
| 276,1705223 | HMDB0041944, HMDB41944                                                                                                                                                                                                            | N-Acetylprocainamide                                                             | 0,067089664                     | 0,928905911 | 0,972396103       |
| 277,1543414 | HMDB0013243, HMDB0028914, HMDB0028998, HMDB0062483, HMDB13243, HMDB28914, HMDB28936, HMDB28998, HMDB62483                                                                                                                         | Leucyl-phenylalanine                                                             | 0,001059726                     | 0,436397533 | 0,675744189       |
| 277,1806226 | HMDB0030801, HMDB0030974, HMDB0031928, HMDB0039251, HMDB0137260, HMDB30801, HMDB30974, HMDB31928, HMDB39251                                                                                                                       | 1-(4-Hydroxy-3-methoxyphenyl)-3-decanone                                         | 0,412137073                     | 0,015668236 | 0,083309158       |
| 277,2164727 | HMDB0001388, HMDB0003073, HMDB00030962, HMDB00030963, HMDB0030964, HMDB01388, HMDB03073, HMDB30962, HMDB30963, HMDB30964                                                                                                          | Alpha-Linolenic acid                                                             | 0,61275186                      | 0,031282897 | 0,135714859       |
| 278,0722116 | HMDB0032162, HMDB32162                                                                                                                                                                                                            | Acrylic acid-2-acrylamido-2-methyl propane sulfonic acid copolymer               | -0,068844747                    | 0,044477496 | 0,168598232       |
| 278,1229723 | HMDB0037844, HMDB37844                                                                                                                                                                                                            | N-(1-Deoxy-1-fructosyl)valine                                                    | 0,063875628                     | 0,564083446 | 0,762230786       |
| 278,1533681 | HMDB0013889, HMDB0015273, HMDB13889, HMDB15273                                                                                                                                                                                    | E-10-Hydroxynortriptyline                                                        | 0,11410013                      | 0,996938914 | 0,996938914       |
| 279,0378276 | HMDB0127482, HMDB0127483                                                                                                                                                                                                          | 6-[(2-carboxyacetyl)oxy]-3,4,5-trihydroxyoxane-2-carboxylic acid                 | -0,288852198                    | 0,01769873  | 0,092414924       |
| 279,161581  | HMDB0030148, HMDB0036979, HMDB0040755, HMDB0041229, HMDB30148, HMDB36979, HMDB40755, HMDB41229                                                                                                                                    | Prehumulinic acid                                                                | 0,233577923                     | 0,180182305 | 0,416761193       |
| 281,1015697 | HMDB0125459, HMDB0125461, HMDB0125462, HMDB0125463                                                                                                                                                                                | 2-[4,6-dihydroxy-3-(4-hydroxy-3-methylbut-2-en-1-yl)-2-methoxyphenyl]acetic acid | 0,165176583                     | 0,603027534 | 0,773604634       |
| 281,1377111 | HMDB0033375, HMDB0034941, HMDB0034983, HMDB0035846, HMDB0038660, HMDB0038661, HMDB0038989, HMDB0039241, HMDB0041324, HMDB33375, HMDB34941, HMDB34983, HMDB35846, HMDB38660, HMDB38661, HMDB38989, HMDB39241, HMDB41324            | Octyl gallate                                                                    | -0,057287088                    | 0,935409001 | 0,975689772       |
| 281,1750299 | HMDB0033630, HMDB33630                                                                                                                                                                                                            | Lactapiperanol C                                                                 | 0,160085949                     | 0,769885741 | 0,883342587       |
| 283,0224882 | HMDB0032876, HMDB0034042, HMDB0034138, HMDB0037921, HMDB0128435, HMDB0140295, HMDB0140296, HMDB32876, HMDB34042, HMDB34138, HMDB37921                                                                                             | Rhein                                                                            | 0,022758371                     | 0,835275629 | 0,921212686       |
| 283,064838  | HMDB0014718, HMDB0014967, HMDB14718, HMDB14967                                                                                                                                                                                    | Mazindol                                                                         | -0,082219828                    | 0,578774501 | 0,762373662       |
| 283,1024769 | HMDB0126522                                                                                                                                                                                                                       | [(2Z)-2-(phenylmethylidene)hept acid                                             | -0,004983315                    | 0,608118064 | 0,77753512        |
| 283,1430196 | HMDB0014947, HMDB14947                                                                                                                                                                                                            | Tropicamide                                                                      | -0,119169858                    | 0,393242214 | 0,641527233       |
| 283,1687653 | HMDB0003422, HMDB0030432, HMDB0038050, HMDB03422, HMDB30432, HMDB38050                                                                                                                                                            | Boldione                                                                         | 0,028622047                     | 0,911892263 | 0,96267561        |
| 284,0875162 | HMDB0005923, HMDB05923                                                                                                                                                                                                            | N4-Acetylcytidine                                                                | -0,035774814                    | 0,548856636 | 0,756072946       |
| 285,0595876 | HMDB0029498, HMDB0041272, HMDB0059998, HMDB0124997, HMDB0125471, HMDB0135181, HMDB29498, HMDB41272, HMDB59998                                                                                                                     | 3"-Methoxyfukiic acid                                                            | 0,128262933                     | 0,951195571 | 0,979271001       |
| 285,1594462 | HMDB0060995, HMDB60995                                                                                                                                                                                                            | 10-alpha-methoxy-9,10-dihydrolysergol                                            | -0,644749435                    | 0,004083251 | 0,031307269       |
| 285,2061738 | HMDB0000672, HMDB0041287, HMDB0059777, HMDB00672, HMDB41287, HMDB59777                                                                                                                                                            | Hexadecanedioic acid                                                             | -0,077947515                    | 0,16267081  | 0,391847917       |
| 285,2224093 | HMDB0000305, HMDB0006216, HMDB0006217, HMDB0006221, HMDB0030403, HMDB00305, HMDB0034735, HMDB0036728, HMDB0036841, HMDB0038709, HMDB03439, HMDB06216, HMDB06217, HMDB06221, HMDB30403, HMDB34735, HMDB36728, HMDB36841, HMDB38709 | Vitamin A                                                                        | 0,068869135                     | 0,831615049 | 0,919098001       |
| 286,1620286 | HMDB0014578, HMDB0014873, HMDB14578, HMDB14873                                                                                                                                                                                    | Cyproheptadine                                                                   | -0,355619813                    | 0,022934937 | 0,111107028       |
| 286,2036265 | HMDB0000791, HMDB00791, HMDB00834                                                                                                                                                                                                 | L-Octanoylcarnitine                                                              | 0,282700094                     | 0,343341745 | 0,603009832       |
| 286,2385563 | HMDB0032358, HMDB32358                                                                                                                                                                                                            | Lauroyl diethanolamide                                                           | 0,483078982                     | 0,02408255  | 0,114130345       |
| 287,0210034 | HMDB0029191, HMDB0135678, HMDB0135688, HMDB0135693, HMDB0135695, HMDB0135696, HMDB29191                                                                                                                                           | 5"-(3",4"-Dihydroxyphenyl)-gamma-valerolactone sulfate                           | 0,186279029                     | 0,627226303 | 0,797290578       |
| 287,0497466 | HMDB0000788, HMDB00788                                                                                                                                                                                                            | Orotidine                                                                        | 0,139914201                     | 0,00596347  | 0,041385986       |
| 287,274455  | HMDB0005943, HMDB0040180, HMDB05943, HMDB40180                                                                                                                                                                                    | 5b-Pregnanediol                                                                  | -0,169071769                    | 0,367756389 | 0,623897998       |
| 288,1241948 | HMDB0041836, HMDB0041955, HMDB41836, HMDB41955                                                                                                                                                                                    | Benzoyl ecgonine                                                                 | -0,031072178                    | 0,296193093 | 0,555441671       |
| 288,1598712 | HMDB0013960, HMDB0014568, HMDB0014712, HMDB0040700, HMDB13960, HMDB14568, HMDB14712, HMDB31435, HMDB40700                                                                                                                         | Donepezil metabolite M4                                                          | -0,12814322                     | 0,156948015 | 0,382286785       |

Supplementary Appendix  
MIRA Study

| m/z         | HMDB ID alternatives                                                                                                                                                                                                   | Suggested annotation                                                | Comparison [vegan] - [omnivore] |             |                   |
|-------------|------------------------------------------------------------------------------------------------------------------------------------------------------------------------------------------------------------------------|---------------------------------------------------------------------|---------------------------------|-------------|-------------------|
|             |                                                                                                                                                                                                                        |                                                                     | Fold Change (log2)              | p-value     | p-value (BH adj.) |
| 289,0388116 | HMDB0059975, HMDB0059976, HMDB0125823, HMDB0127756, HMDB0127760, HMDB0135701, HMDB0135702, HMDB0135708, HMDB0135711, HMDB0135712, HMDB0135714, HMDB0135715, HMDB59975, HMDB59976                                       | 4-Hydroxy-5-(3''-hydroxyphenyl)-valeric acid-3''-O-sulphate         | 0,062820221                     | 0,183227031 | 0,417740595       |
| 289,1081559 | HMDB0038722, HMDB0127764, HMDB38722                                                                                                                                                                                    | 5,6-Dihydro-11-methoxyangonin                                       | -0,188435699                    | 0,323319822 | 0,586143212       |
| 289,1924376 | HMDB0013962, HMDB0060962, HMDB13962, HMDB60962                                                                                                                                                                         | Verapamil metabolite D-617                                          | -0,022386921                    | 0,064775694 | 0,209979201       |
| 289,2149369 | HMDB0014347, HMDB14347                                                                                                                                                                                                 | Succinylcholine                                                     | 0,198879072                     | 0,071777212 | 0,221949393       |
| 289,2179037 | HMDB0000031, HMDB0000365, HMDB0000490, HMDB0000546, HMDB0002961, HMDB00031, HMDB0003818, HMDB0005849, HMDB0006770, HMDB00365, HMDB0037711, HMDB00490, HMDB00546, HMDB02961, HMDB03818, HMDB05849, HMDB06770, HMDB37711 | Androsterone                                                        | 0,224724548                     | 0,054338716 | 0,191061938       |
| 290,0353149 | HMDB0142153                                                                                                                                                                                                            | (2S)-2-amino-3-[4-hydroxy-3-(sulfoxyphenyl)-2-methylpropanoic acid  | -0,02292787                     | 0,154136343 | 0,380756066       |
| 291,0184024 | HMDB0124954, HMDB0124955, HMDB0127788, HMDB0127789, HMDB0127843, HMDB0127844, HMDB0128005, HMDB0133893                                                                                                                 | [2-hydroxy-5-(2-hydroxy-3-methoxy-3-oxopropyl)phenyl]oxidar acid    | 0,142280601                     | 0,107225364 | 0,295428876       |
| 291,0657311 | HMDB0039404, HMDB0039405, HMDB39404, HMDB39405                                                                                                                                                                         | 3-Hydroxy-9-(4-hydroxyphenyl)-1H,3H-naphtho[1,8-cd]pyran-1-one      | 0,852408459                     | 0,073234967 | 0,224073303       |
| 291,1236888 | HMDB0030767, HMDB0037774, HMDB0037775, HMDB0094645, HMDB30767, HMDB37774, HMDB37775, HMDB94645                                                                                                                         | 11,12-Dimethoxydihydrokawai                                         | -0,003693719                    | 0,333324294 | 0,594134913       |
| 293,0481373 | HMDB0135202                                                                                                                                                                                                            | (2-hydroxy-1,2-diphenylethoxy)sulfonic acid                         | 0,04209622                      | 0,550201696 | 0,756072946       |
| 295,2626038 | HMDB0013622, HMDB0035575, HMDB13622, HMDB35575                                                                                                                                                                         | Nonadeca-10(Z)-enoic acid                                           | -0,9958465                      | 4,2573E-07  | 2,06243E-05       |
| 296,0376081 | HMDB0000709, HMDB00709                                                                                                                                                                                                 | L-Cysteinylglycine disulfide                                        | -0,09328659                     | 0,479861628 | 0,708846137       |
| 296,0868637 | HMDB0032367, HMDB32367                                                                                                                                                                                                 | L-Menthone                                                          | 0,153943351                     | 0,235394131 | 0,48756219        |
| 298,2766005 | HMDB0000252, HMDB0001480, HMDB0002100, HMDB00252, HMDB01480, HMDB02100                                                                                                                                                 | 1,2-glycerol ketal Sphingosine                                      | -0,323288387                    | 1,60078E-06 | 6,06903E-05       |
| 299,0417043 | HMDB0035179, HMDB35179                                                                                                                                                                                                 | Mumefural                                                           | -0,137152338                    | 0,01947109  | 0,099211632       |
| 299,0644478 | HMDB0029920, HMDB29920                                                                                                                                                                                                 | beta-D-3-Ribofuranosyluric acid                                     | 0,041532195                     | 0,734951658 | 0,867529672       |
| 299,2226533 | HMDB0011531, HMDB0011562, HMDB11531, HMDB11562                                                                                                                                                                         | MG(0:0/14:(9Z)/0:0)                                                 | 0,008553504                     | 0,005456693 | 0,03900194        |
| 300,0376395 | HMDB0000781, HMDB0000814, HMDB0000841, HMDB00781, HMDB00814, HMDB00841                                                                                                                                                 | Acetylglucosamine sulfate                                           | 0,233872575                     | 0,42786068  | 0,666635014       |
| 300,99912   | HMDB0002899, HMDB02899                                                                                                                                                                                                 | Ellagic acid                                                        | -0,008994095                    | 0,461726479 | 0,692396623       |
| 301,1431091 | HMDB0000530, HMDB0005056, HMDB0012270, HMDB0014325, HMDB0036472, HMDB00530, HMDB0126616, HMDB05056, HMDB12270, HMDB14325, HMDB36472                                                                                    | 6-Ketoestriol                                                       | -0,276024869                    | 0,08953446  | 0,263763679       |
| 301,1662708 | HMDB0031094, HMDB31094                                                                                                                                                                                                 | Glycerol tributanoate                                               | -0,338839949                    | 0,002188181 | 0,020085197       |
| 302,114763  | HMDB0013240, HMDB13240                                                                                                                                                                                                 | Indoleacetyl glutamine                                              | 0,137288021                     | 0,257885359 | 0,514590464       |
| 303,0180352 | HMDB0059985, HMDB0059987, HMDB0060020, HMDB0128711, HMDB0128713, HMDB59985, HMDB59987, HMDB60020                                                                                                                       | 5-(3'',4'',5''-Trihydroxyphenyl)-gamma-valerolactone-3''-O-sulphate | -0,065112014                    | 0,664251084 | 0,822671228       |
| 305,0306721 | HMDB0059651, HMDB59651                                                                                                                                                                                                 | 2-(3,4-Dihydroxybenzoyloxy)-4,6-dihydroxybenzoate                   | 0,44064768                      | 0,248140539 | 0,50335759        |
| 305,0484818 | HMDB0135218, HMDB0135220, HMDB0135222, HMDB0135224, HMDB0135226, HMDB0135546, HMDB0135548, HMDB0135550                                                                                                                 | (3-oxo-1,3-diphenylpropoxy)sulfoni acid                             | 0,212062413                     | 0,857435709 | 0,93241486        |
| 305,1744864 | HMDB0012799, HMDB0034780, HMDB12799, HMDB34780                                                                                                                                                                         | 5''-Carboxy-gamma-chromanol                                         | 0,190834935                     | 0,38542981  | 0,636543172       |
| 306,0756906 | HMDB0000125, HMDB001025, HMDB01463, HMDB06960                                                                                                                                                                          | Glutathione                                                         | 0,004394038                     | 0,480422095 | 0,708846137       |
| 307,1537429 | HMDB0030496, HMDB0035724, HMDB0036489, HMDB30496, HMDB35724, HMDB36489                                                                                                                                                 | ACRL Toxin II                                                       | -0,141924183                    | 0,989950023 | 0,99357422        |
| 307,1906008 | HMDB0029852, HMDB0031471, HMDB0032664, HMDB0033243, HMDB0034781, HMDB0040867, HMDB29852, HMDB31471, HMDB32664, HMDB33243, HMDB34781, HMDB40867                                                                         | Methylgingerol                                                      | 0,455997736                     | 0,038153024 | 0,15402517        |
| 307,2269841 | HMDB0030960, HMDB0031091, HMDB0031379, HMDB0061646, HMDB0094643, HMDB0112070, HMDB0112090, HMDB0112096, HMDB0112100, HMDB30960, HMDB31091, HMDB31379, HMDB61646, HMDB94643                                             | Obtusilactone A                                                     | 0,167679006                     | 0,201431307 | 0,44580736        |
| 308,0970676 | HMDB0000230, HMDB0000773, HMDB00230, HMDB00773, HMDB00800                                                                                                                                                              | N-Acetylneuraminic acid                                             | -0,025442462                    | 0,784614285 | 0,890864136       |



Supplementary Appendix  
MIRA Study

| m/z         | HMDB ID alternatives                                                                                                                                                                                                                                                                                                                                                                                                                                                                                                                                                                                                                                                                                                                                                                                                                                                                                             | Suggested annotation                                                                                           | Comparison [vegan] - [omnivore] |             |                   |
|-------------|------------------------------------------------------------------------------------------------------------------------------------------------------------------------------------------------------------------------------------------------------------------------------------------------------------------------------------------------------------------------------------------------------------------------------------------------------------------------------------------------------------------------------------------------------------------------------------------------------------------------------------------------------------------------------------------------------------------------------------------------------------------------------------------------------------------------------------------------------------------------------------------------------------------|----------------------------------------------------------------------------------------------------------------|---------------------------------|-------------|-------------------|
|             |                                                                                                                                                                                                                                                                                                                                                                                                                                                                                                                                                                                                                                                                                                                                                                                                                                                                                                                  |                                                                                                                | Fold Change (log2)              | p-value     | p-value (BH adj.) |
| 308,9779278 | HMDB0011688, HMDB11688                                                                                                                                                                                                                                                                                                                                                                                                                                                                                                                                                                                                                                                                                                                                                                                                                                                                                           | Ribose                                                                                                         | 0,168062626                     | 0,558120332 | 0,757470764       |
| 309,0412599 | HMDB0033657, HMDB0035230, HMDB33657, HMDB35230                                                                                                                                                                                                                                                                                                                                                                                                                                                                                                                                                                                                                                                                                                                                                                                                                                                                   | 1,5-bisphosphate                                                                                               | 0,016963658                     | 0,462127104 | 0,692396623       |
| 309,1175285 | HMDB0015102, HMDB15102, HMDB61038                                                                                                                                                                                                                                                                                                                                                                                                                                                                                                                                                                                                                                                                                                                                                                                                                                                                                | methylesterigmatocystin                                                                                        |                                 |             |                   |
| 309,2790445 | HMDB0002231, HMDB0034296, HMDB0034451, HMDB0035159, HMDB0035572, HMDB0035573, HMDB0035574, HMDB0037127, HMDB0062436, HMDB02231, HMDB34296, HMDB34451, HMDB35159, HMDB35572, HMDB35573, HMDB35574, HMDB37127, HMDB62436                                                                                                                                                                                                                                                                                                                                                                                                                                                                                                                                                                                                                                                                                           | Desloratadine                                                                                                  | -0,280889773                    | 0,270524193 | 0,53491405        |
| 311,0405055 | HMDB0013680, HMDB0029276, HMDB13680, HMDB29276, HMDB39236                                                                                                                                                                                                                                                                                                                                                                                                                                                                                                                                                                                                                                                                                                                                                                                                                                                        | Caftaric acid                                                                                                  | 0,001105354                     | 0,407883239 | 0,65141792        |
| 311,1397929 | HMDB0013302, HMDB13302                                                                                                                                                                                                                                                                                                                                                                                                                                                                                                                                                                                                                                                                                                                                                                                                                                                                                           | Phenylalanylphenylalani                                                                                        | -0,228888304                    | 0,238181605 | 0,491003214       |
| 311,1677947 | HMDB0032549, HMDB32549                                                                                                                                                                                                                                                                                                                                                                                                                                                                                                                                                                                                                                                                                                                                                                                                                                                                                           | N-Undecylbenzenesulfonic acid                                                                                  | -0,074222225                    | 0,470925791 | 0,700188213       |
| 311,2211419 | HMDB0003871, HMDB0004706, HMDB0006940, HMDB0010201, HMDB0010208, HMDB0010221, HMDB0040900, HMDB0062281, HMDB0062434, HMDB03871, HMDB04706, HMDB06940, HMDB10201, HMDB10208, HMDB10221, HMDB40900, HMDB62281, HMDB62434                                                                                                                                                                                                                                                                                                                                                                                                                                                                                                                                                                                                                                                                                           | 13-L-Hydroperoxylinoic acid                                                                                    | 0,358922474                     | 0,461626518 | 0,692396623       |
| 314,1028482 | HMDB0029324, HMDB0136318, HMDB0136320, HMDB0137014, HMDB29324                                                                                                                                                                                                                                                                                                                                                                                                                                                                                                                                                                                                                                                                                                                                                                                                                                                    | Citpressine II                                                                                                 | -0,153554514                    | 0,212592464 | 0,458862942       |
| 315,2523265 | HMDB0011532, HMDB0011563, HMDB0031008, HMDB0059633, HMDB0072849, HMDB0072862, HMDB0072865, HMDB0072878, HMDB11532, HMDB11563, HMDB31008, HMDB59633, HMDB72849, HMDB72862, HMDB72865, HMDB72878                                                                                                                                                                                                                                                                                                                                                                                                                                                                                                                                                                                                                                                                                                                   | MG(0:0/15:0/0:0)                                                                                               | 0,736251243                     | 0,006075007 | 0,041385986       |
| 316,1166184 | HMDB0037839, HMDB37839                                                                                                                                                                                                                                                                                                                                                                                                                                                                                                                                                                                                                                                                                                                                                                                                                                                                                           | N-(1-Deoxy-1-fructosyl)histidine                                                                               | -0,097234043                    | 0,826675393 | 0,917884016       |
| 316,1909378 | HMDB0014869, HMDB0015592, HMDB14869, HMDB15592                                                                                                                                                                                                                                                                                                                                                                                                                                                                                                                                                                                                                                                                                                                                                                                                                                                                   | Nateglinide                                                                                                    | -0,265210854                    | 0,013845921 | 0,07546027        |
| 316,211292  | HMDB0061635, HMDB61635                                                                                                                                                                                                                                                                                                                                                                                                                                                                                                                                                                                                                                                                                                                                                                                                                                                                                           | 3-hydroxynonanoyl carnitine                                                                                    | 0,119839458                     | 0,573159799 | 0,762286527       |
| 319,0260863 | HMDB0029465, HMDB29465                                                                                                                                                                                                                                                                                                                                                                                                                                                                                                                                                                                                                                                                                                                                                                                                                                                                                           | Erosin                                                                                                         | -0,214971454                    | 0,08928007  | 0,263763679       |
| 319,0958098 | HMDB0041463, HMDB0126080, HMDB41463                                                                                                                                                                                                                                                                                                                                                                                                                                                                                                                                                                                                                                                                                                                                                                                                                                                                              | 2,3-Dihydro-2,3-dihydroxy-4-(4-methoxyphenyl)-1H-phenalen-1-one                                                | 0,045987975                     | 0,019793138 | 0,099766568       |
| 319,1541927 | HMDB0032698, HMDB0041824, HMDB0041838, HMDB0134978, HMDB32698, HMDB41824, HMDB41838                                                                                                                                                                                                                                                                                                                                                                                                                                                                                                                                                                                                                                                                                                                                                                                                                              | Bis(2-methylpropanoyloxy)-9,10-epoxy-p-mentha-1,3,5-triene                                                     | 0,158339493                     | 0,728726917 | 0,864557648       |
| 319,2258581 | HMDB0002190, HMDB0002232, HMDB0002283, HMDB0003876, HMDB0004264, HMDB0004673, HMDB0004679, HMDB0004680, HMDB0004682, HMDB0005998, HMDB0006111, HMDB0006245, HMDB0010222, HMDB0010409, HMDB0011134, HMDB0011136, HMDB0012508, HMDB0012567, HMDB0012598, HMDB0036262, HMDB0036705, HMDB0036810, HMDB0038520, HMDB0038688, HMDB0038689, HMDB0038694, HMDB0060101, HMDB0062287, HMDB0062294, HMDB0062302, HMDB0062431, HMDB0062433, HMDB0112068, HMDB0112071, HMDB02110, HMDB02109, HMDB02218, HMDB02232, HMDB02283, HMDB03876, HMDB03978, HMDB04264, HMDB04672, HMDB04673, HMDB04679, HMDB04680, HMDB04682, HMDB04698, HMDB05080, HMDB05998, HMDB06111, HMDB06245, HMDB10222, HMDB10409, HMDB11134, HMDB11136, HMDB11138, HMDB11642, HMDB12508, HMDB12567, HMDB12598, HMDB36262, HMDB36705, HMDB36810, HMDB38520, HMDB38688, HMDB38689, HMDB38694, HMDB60101, HMDB62287, HMDB62294, HMDB62302, HMDB62431, HMDB62433 | 5,6-Epoxy-8,11,14-eicosatrienoic acid                                                                          | -0,023065197                    | 0,425314801 | 0,664649654       |
| 321,0427431 | HMDB0135416, HMDB0135451, HMDB0135454, HMDB0135455, HMDB0135458, HMDB0135459, HMDB0135462, HMDB0141213                                                                                                                                                                                                                                                                                                                                                                                                                                                                                                                                                                                                                                                                                                                                                                                                           | [2-hydroxy-5-(3-phenylpropanoyl)phenyl] acid                                                                   | 0,110525327                     | 0,694114374 | 0,844166993       |
| 321,0593739 | HMDB0038515, HMDB38515                                                                                                                                                                                                                                                                                                                                                                                                                                                                                                                                                                                                                                                                                                                                                                                                                                                                                           | L-gamma-Glutamyl-S-allylthio-L-cysteine                                                                        | 0,060123806                     | 0,906389969 | 0,961999186       |
| 321,0990185 | HMDB0030266, HMDB30266                                                                                                                                                                                                                                                                                                                                                                                                                                                                                                                                                                                                                                                                                                                                                                                                                                                                                           | Berberubine                                                                                                    | -0,031794152                    | 0,151460216 | 0,380614721       |
| 323,0548581 | HMDB0029535, HMDB0030588, HMDB0128875, HMDB0129364, HMDB29535, HMDB30588                                                                                                                                                                                                                                                                                                                                                                                                                                                                                                                                                                                                                                                                                                                                                                                                                                         | Grevilline A                                                                                                   | -0,005954352                    | 0,761924651 | 0,879997742       |
| 323,1870268 | HMDB0033631, HMDB0038580, HMDB33631, HMDB38580                                                                                                                                                                                                                                                                                                                                                                                                                                                                                                                                                                                                                                                                                                                                                                                                                                                                   | Lactapiperanol D                                                                                               | 0,092189363                     | 0,650701804 | 0,811748173       |
| 325,0344817 | HMDB0128433, HMDB0128434, HMDB0128436, HMDB0140672, HMDB0140673, HMDB0140674                                                                                                                                                                                                                                                                                                                                                                                                                                                                                                                                                                                                                                                                                                                                                                                                                                     | 13,14-dihydroxy-9-oxo-8,17-dioxatetracyclo[8.7.0.0 <sup>2</sup> .1(10),2(7),3,5,11(16),12,heptaen-5-yl acetate | -0,019660056                    | 0,041896647 | 0,164049886       |
| 325,1833085 | HMDB0031031, HMDB0059915, HMDB31031, HMDB59915                                                                                                                                                                                                                                                                                                                                                                                                                                                                                                                                                                                                                                                                                                                                                                                                                                                                   | 2-Dodecylbenzenesulfonic acid                                                                                  | 0,029094304                     | 0,287989516 | 0,549511724       |
| 326,0880807 | HMDB0010316, HMDB0029344, HMDB10316, HMDB29344                                                                                                                                                                                                                                                                                                                                                                                                                                                                                                                                                                                                                                                                                                                                                                                                                                                                   | Acetaminophen glucuronide                                                                                      | 0,144154374                     | 0,371101997 | 0,626440867       |
| 327,1832369 | HMDB0061062, HMDB61062                                                                                                                                                                                                                                                                                                                                                                                                                                                                                                                                                                                                                                                                                                                                                                                                                                                                                           | 7-hydroxygranisetron                                                                                           | -0,144346196                    | 0,441696132 | 0,679292816       |
| 327,1832369 | HMDB0034579, HMDB34579                                                                                                                                                                                                                                                                                                                                                                                                                                                                                                                                                                                                                                                                                                                                                                                                                                                                                           | 8-O-Methylolbongine                                                                                            | -0,144346196                    | 0,441696132 | 0,679292816       |
| 327,2323316 | HMDB0002183, HMDB0030053, HMDB0030446, HMDB0035185, HMDB0038908, HMDB02183, HMDB30053, HMDB30446, HMDB35185, HMDB38908                                                                                                                                                                                                                                                                                                                                                                                                                                                                                                                                                                                                                                                                                                                                                                                           | C22:6                                                                                                          | -0,815556353                    | 4,48904E-05 | 0,000889646       |
| 328,1554258 | HMDB0003601, HMDB0038724, HMDB03601, HMDB38724                                                                                                                                                                                                                                                                                                                                                                                                                                                                                                                                                                                                                                                                                                                                                                                                                                                                   | (S)-Reticuline                                                                                                 | 0,256279903                     | 0,392475934 | 0,641527233       |
| 330,115222  | HMDB0033665, HMDB33665                                                                                                                                                                                                                                                                                                                                                                                                                                                                                                                                                                                                                                                                                                                                                                                                                                                                                           | N'-Hydroxyneosaxitoxin                                                                                         | 0,12890819                      | 0,033589662 | 0,143415452       |

Supplementary Appendix  
MIRA Study

| m/z         | HMDB ID alternatives                                                                                                                                                                                                                                                                                                                                                                                                                                                                                                                                                                                                                                                                                                                                                                                                                                                                                                                                                                                  | Suggested annotation                                                         | Comparison [vegan] - [omnivore] |             |                   |
|-------------|-------------------------------------------------------------------------------------------------------------------------------------------------------------------------------------------------------------------------------------------------------------------------------------------------------------------------------------------------------------------------------------------------------------------------------------------------------------------------------------------------------------------------------------------------------------------------------------------------------------------------------------------------------------------------------------------------------------------------------------------------------------------------------------------------------------------------------------------------------------------------------------------------------------------------------------------------------------------------------------------------------|------------------------------------------------------------------------------|---------------------------------|-------------|-------------------|
|             |                                                                                                                                                                                                                                                                                                                                                                                                                                                                                                                                                                                                                                                                                                                                                                                                                                                                                                                                                                                                       |                                                                              | Fold Change (log2)              | p-value     | p-value (BH adj.) |
| 331,1759357 | HMDB0029784, HMDB0033019, HMDB0033110, HMDB0033215, HMDB0033220, HMDB0033221, HMDB0033644, HMDB0034772, HMDB0035025, HMDB0035634, HMDB0038747, HMDB0038980, HMDB0038981, HMDB0039055, HMDB0060012, HMDB29784, HMDB33019, HMDB33110, HMDB33215, HMDB33220, HMDB33221, HMDB33644, HMDB34772, HMDB35025, HMDB35634, HMDB38747, HMDB38980, HMDB38981, HMDB39055, HMDB60012                                                                                                                                                                                                                                                                                                                                                                                                                                                                                                                                                                                                                                | Unshuoside A                                                                 | -0.000610997                    | 0.00954923  | 0.058230271       |
| 333,0065086 | HMDB0133344, HMDB0134560, HMDB0137557                                                                                                                                                                                                                                                                                                                                                                                                                                                                                                                                                                                                                                                                                                                                                                                                                                                                                                                                                                 | [3-(7-hydroxy-4-oxo-4H-chromen-2-yl)phenyl]oxindanesulfonic acid             | 1.495444692                     | 0.184826575 | 0.419710346       |
| 333,02888   | HMDB0060029, HMDB0128699, HMDB0128707, HMDB0128717, HMDB60029                                                                                                                                                                                                                                                                                                                                                                                                                                                                                                                                                                                                                                                                                                                                                                                                                                                                                                                                         | 5-(3'',4'',5''-Trihydroxyphenyl)-gamma-valerolactone-O-methyl-O-sulphate     | 0.696644402                     | 0.176272487 | 0.413197872       |
| 333,110474  | HMDB0034937, HMDB34937                                                                                                                                                                                                                                                                                                                                                                                                                                                                                                                                                                                                                                                                                                                                                                                                                                                                                                                                                                                | Capparilicoside A                                                            | -0.044048311                    | 0.156002032 | 0.382286785       |
| 334,1243542 | HMDB0000489, HMDB000489, HMDB01515                                                                                                                                                                                                                                                                                                                                                                                                                                                                                                                                                                                                                                                                                                                                                                                                                                                                                                                                                                    | Aspartylglycosamine                                                          | 0.013536772                     | 0.557439272 | 0.757470764       |
| 334,3092749 | HMDB0031678, HMDB31678                                                                                                                                                                                                                                                                                                                                                                                                                                                                                                                                                                                                                                                                                                                                                                                                                                                                                                                                                                                | Pipericine                                                                   | -0.13872926                     | 0.4873861   | 0.710703477       |
| 335,0772864 | HMDB0029287, HMDB0029288, HMDB0030654, HMDB0033563, HMDB0033997, HMDB0033999, HMDB0125035, HMDB0125036, HMDB0125038, HMDB0125039, HMDB0125050, HMDB0125051, HMDB0125053, HMDB0125054, HMDB0125065, HMDB0125066, HMDB0125068, HMDB0125069, HMDB0125078, HMDB0125080, HMDB0125083, HMDB0126514, HMDB29287, HMDB29288, HMDB30654, HMDB33563, HMDB33997, HMDB33999                                                                                                                                                                                                                                                                                                                                                                                                                                                                                                                                                                                                                                        | 3-Caffeoyl-1,5-quinolactone                                                  | 0.130391606                     | 0.584999898 | 0.762941837       |
| 335,2204161 | HMDB0001085, HMDB0001193, HMDB0002236, HMDB0002656, HMDB0002982, HMDB0004243, HMDB0004244, HMDB0004688, HMDB0004690, HMDB0004692, HMDB0004693, HMDB0004696, HMDB0004699, HMDB0005050, HMDB0005087, HMDB0005088, HMDB0005089, HMDB0010204, HMDB0010211, HMDB0010216, HMDB0010219, HMDB0011135, HMDB0012498, HMDB0012839, HMDB0034686, HMDB0039171, HMDB0039441, HMDB0060103, HMDB0060104, HMDB0060105, HMDB0062409, HMDB0062479, HMDB0062614, HMDB0062615, HMDB0062619, HMDB0062687, HMDB0062688, HMDB0062749, HMDB01085, HMDB01193, HMDB02236, HMDB02656, HMDB02982, HMDB04243, HMDB04244, HMDB04683, HMDB04688, HMDB04690, HMDB04692, HMDB04693, HMDB04696, HMDB04699, HMDB05050, HMDB05072, HMDB05087, HMDB05088, HMDB05089, HMDB06501, HMDB10204, HMDB10211, HMDB10216, HMDB10218, HMDB10219, HMDB11135, HMDB12498, HMDB12839, HMDB12840, HMDB34686, HMDB39171, HMDB39441, HMDB60103, HMDB60104, HMDB60105, HMDB62409, HMDB62479, HMDB62614, HMDB62615, HMDB62619, HMDB62687, HMDB62688, HMDB62749 | Leukotriene B4                                                               | 0.461100334                     | 0.135357461 | 0.35128484        |
| 337,0372638 | HMDB0134587, HMDB0135131, HMDB0135370, HMDB0135374, HMDB0135378, HMDB0135421, HMDB0135425, HMDB0135430, HMDB0135433, HMDB0135434, HMDB0135439, HMDB0135440, HMDB0135445                                                                                                                                                                                                                                                                                                                                                                                                                                                                                                                                                                                                                                                                                                                                                                                                                               | 5-[(E)-2-(3,5-dihydroxyphenyl)ethenyl]-2-methoxyphenyloxidanesic acid        | 0.88473281                      | 0.20943955  | 0.455439619       |
| 337,310462  | HMDB0002068, HMDB0002884, HMDB0031013, HMDB0032470, HMDB0035566, HMDB0035567, HMDB0035568, HMDB0035569, HMDB0062659, HMDB02068, HMDB02884, HMDB31013, HMDB32470, HMDB35566, HMDB35567, HMDB35568, HMDB35569, HMDB62659                                                                                                                                                                                                                                                                                                                                                                                                                                                                                                                                                                                                                                                                                                                                                                                | Erucic acid                                                                  | 0.022661728                     | 0.589543199 | 0.766142577       |
| 338,0376237 | HMDB0006273, HMDB0012268, HMDB06273, HMDB12268                                                                                                                                                                                                                                                                                                                                                                                                                                                                                                                                                                                                                                                                                                                                                                                                                                                                                                                                                        | 5-amino-1-(5-phospho-D-ribose)imidazole-4-carboxylate                        | 0.213674871                     | 0.333957669 | 0.594134913       |
| 339,2073096 | HMDB0030359, HMDB30359                                                                                                                                                                                                                                                                                                                                                                                                                                                                                                                                                                                                                                                                                                                                                                                                                                                                                                                                                                                | 14,19-Dihydrospidosperspermatin                                              | -0.010497598                    | 0.925904177 | 0.9704188         |
| 339,2333153 | HMDB0033786, HMDB0039762, HMDB33786, HMDB39762                                                                                                                                                                                                                                                                                                                                                                                                                                                                                                                                                                                                                                                                                                                                                                                                                                                                                                                                                        | Plastoquinone 3                                                              | -0.299415655                    | 0.575621228 | 0.762286527       |
| 340,1245347 | HMDB0006591, HMDB0011668, HMDB06591, HMDB11668                                                                                                                                                                                                                                                                                                                                                                                                                                                                                                                                                                                                                                                                                                                                                                                                                                                                                                                                                        | Lactosamine                                                                  | -0.050658706                    | 0.639887595 | 0.801743976       |
| 341,0517196 | HMDB0129381                                                                                                                                                                                                                                                                                                                                                                                                                                                                                                                                                                                                                                                                                                                                                                                                                                                                                                                                                                                           | 6-(2H-1,3-benzodioxole-5-carbonyloxy)-3,4,5-trihydroxoxane-2-carboxylic acid | 0.055630983                     | 0.780076585 | 0.889038232       |
| 341,1082004 | HMDB0000048, HMDB0000055, HMDB0000163, HMDB0000186, HMDB0000258, HMDB0000740, HMDB0000975, HMDB0002923, HMDB00048, HMDB00055, HMDB0005826, HMDB000603, HMDB0006792, HMDB0011740, HMDB0011742, HMDB00163, HMDB00186, HMDB00258, HMDB0029880, HMDB0029882, HMDB0029898, HMDB0029902, HMDB0029919, HMDB0029933, HMDB0033368, HMDB0037138, HMDB0038489, HMDB0039237, HMDB0039727, HMDB0039876, HMDB0041627, HMDB0060068, HMDB00740, HMDB00975, HMDB0125600, HMDB0133305, HMDB02923, HMDB05761, HMDB05826, HMDB06603, HMDB06792, HMDB11740, HMDB11742, HMDB14719, HMDB29880, HMDB29882, HMDB29898, HMDB29902, HMDB29919, HMDB29933, HMDB33368, HMDB37138, HMDB38489, HMDB39237, HMDB39727, HMDB39876, HMDB41627, HMDB60068                                                                                                                                                                                                                                                                                 | Disaccharide                                                                 | 0.055325745                     | 0.4914966   | 0.715500893       |
| 342,2087955 | HMDB0030340, HMDB0033959, HMDB30340, HMDB33959                                                                                                                                                                                                                                                                                                                                                                                                                                                                                                                                                                                                                                                                                                                                                                                                                                                                                                                                                        | Piperolein B                                                                 | -0.032640037                    | 0.499467079 | 0.722211629       |
| 343,1674976 | HMDB0015118, HMDB0015399, HMDB15118, HMDB15399                                                                                                                                                                                                                                                                                                                                                                                                                                                                                                                                                                                                                                                                                                                                                                                                                                                                                                                                                        | Formoterol                                                                   | 0.084163006                     | 0.575642099 | 0.762286527       |
| 343,2389603 | HMDB0003166, HMDB0003318, HMDB0006001, HMDB03166, HMDB03318, HMDB06001                                                                                                                                                                                                                                                                                                                                                                                                                                                                                                                                                                                                                                                                                                                                                                                                                                                                                                                                | 16b-Hydroxystanzolol                                                         | -0.237912464                    | 0.283507481 | 0.546386287       |
| 345,2081609 | HMDB0029561, HMDB0030280, HMDB29561, HMDB30280                                                                                                                                                                                                                                                                                                                                                                                                                                                                                                                                                                                                                                                                                                                                                                                                                                                                                                                                                        | (+)-Calycanthine                                                             | 0.125255584                     | 0.415369139 | 0.656162843       |
| 345,2436798 | HMDB0031465, HMDB0033897, HMDB0034944, HMDB0036722, HMDB0041001, HMDB0041302, HMDB31465, HMDB33897, HMDB34944, HMDB36722, HMDB41001, HMDB41302                                                                                                                                                                                                                                                                                                                                                                                                                                                                                                                                                                                                                                                                                                                                                                                                                                                        | Methyl-[10]-shogaol                                                          | -0.146610002                    | 0.11837064  | 0.315655041       |



Supplementary Appendix  
MIRA Study

| m/z         | HMDB ID alternatives                                                                                                                                                                                                                                                                                                                                                                                                                                                                                                                                                                     | Suggested annotation                               | Comparison [vegan] - [omnivore] |             |                   |
|-------------|------------------------------------------------------------------------------------------------------------------------------------------------------------------------------------------------------------------------------------------------------------------------------------------------------------------------------------------------------------------------------------------------------------------------------------------------------------------------------------------------------------------------------------------------------------------------------------------|----------------------------------------------------|---------------------------------|-------------|-------------------|
|             |                                                                                                                                                                                                                                                                                                                                                                                                                                                                                                                                                                                          |                                                    | Fold Change (log2)              | p-value     | p-value (BH adj.) |
| 367,1047334 | HMDB0030669, HMDB0039959, HMDB0039960, HMDB0126418, HMDB0126419, HMDB0126420, HMDB0126421, HMDB0126422, HMDB0126423, HMDB0127742, HMDB0129399, HMDB0135673, HMDB30669, HMDB39959, HMDB39960                                                                                                                                                                                                                                                                                                                                                                                              | 3-O-Feruloylquinic acid                            | 0,131998449                     | 0,355040807 | 0,614116037       |
| 367,1573803 | HMDB0001032, HMDB0002833, HMDB0013230, HMDB01032, HMDB02833, HMDB13230                                                                                                                                                                                                                                                                                                                                                                                                                                                                                                                   | Dehydroepiandrosterone sulfate                     | -0,207608681                    | 0,779703873 | 0,889038232       |
| 367,1880931 | HMDB0114760, HMDB0114764                                                                                                                                                                                                                                                                                                                                                                                                                                                                                                                                                                 | LPA(a-13:0/0:0)                                    | -0,12100901                     | 0,963442677 | 0,984003393       |
| 368,3149199 | HMDB0062341, HMDB62341                                                                                                                                                                                                                                                                                                                                                                                                                                                                                                                                                                   | N-Stearoyl GABA                                    | -0,146582196                    | 0,846854529 | 0,927013183       |
| 369,0986523 | HMDB0031941, HMDB0034119, HMDB0035527, HMDB0036555, HMDB0038398, HMDB0038900, HMDB0038932, HMDB0039731, HMDB0039732, HMDB0132502, HMDB0132503, HMDB0137144, HMDB31941, HMDB34119, HMDB35527, HMDB36555, HMDB38398, HMDB38900, HMDB38932, HMDB39731, HMDB39732                                                                                                                                                                                                                                                                                                                            | 8"-Episesaminone                                   | -0,099654752                    | 0,838037378 | 0,921212686       |
| 371,1497084 | HMDB0005789, HMDB0030087, HMDB0030826, HMDB0032733, HMDB0032734, HMDB0035182, HMDB0039066, HMDB0041416, HMDB0124810, HMDB0124811, HMDB0124812, HMDB0124813, HMDB0124815, HMDB0124816, HMDB0124817, HMDB0124828, HMDB0124911, HMDB0124912, HMDB0124913, HMDB0124914, HMDB0124915, HMDB0125800, HMDB0130099, HMDB0130100, HMDB0130288, HMDB0130289, HMDB0130290, HMDB0130291, HMDB0130292, HMDB0133480, HMDB0133481, HMDB0133492, HMDB0133513, HMDB0133514, HMDB0133520, HMDB0133527, HMDB0133537, HMDB005789, HMDB30087, HMDB30826, HMDB32733, HMDB32734, HMDB35182, HMDB39066, HMDB41416 | Tetrahydrocurcumin                                 | -0,303076751                    | 0,044005815 | 0,168598232       |
| 371,1753048 | HMDB0003134, HMDB03134                                                                                                                                                                                                                                                                                                                                                                                                                                                                                                                                                                   | Biocytin                                           | -0,011838605                    | 0,758285142 | 0,878033325       |
| 371,2568939 | HMDB0013627, HMDB0014629, HMDB0041301, HMDB13627, HMDB14629, HMDB41301                                                                                                                                                                                                                                                                                                                                                                                                                                                                                                                   | Cervonoyl ethanolamide                             | 0,189226125                     | 0,093059935 | 0,268702858       |
| 372,3282482 | HMDB0039738, HMDB39738                                                                                                                                                                                                                                                                                                                                                                                                                                                                                                                                                                   | Pipereicosalidine                                  | -0,074883648                    | 0,75037936  | 0,872880287       |
| 373,2005505 | HMDB0011651, HMDB0015094, HMDB0030456, HMDB0040525, HMDB11651, HMDB15094, HMDB30456, HMDB40525                                                                                                                                                                                                                                                                                                                                                                                                                                                                                           | 11beta,20-Dihydroxy-3-oxopregn-4-en-21-oic acid    | -0,115937199                    | 0,468512496 | 0,700188213       |
| 373,2751974 | HMDB0000308, HMDB00308, HMDB0038522, HMDB0041453, HMDB38522, HMDB41453                                                                                                                                                                                                                                                                                                                                                                                                                                                                                                                   | 3b-Hydroxy-5-cholenoic acid                        | 0,495790127                     | 0,33393231  | 0,594134913       |
| 375,2162198 | HMDB0002294, HMDB0003733, HMDB0011652, HMDB0012580, HMDB0012601, HMDB0012638, HMDB0012777, HMDB0012855, HMDB0030147, HMDB0030455, HMDB0040955, HMDB0040956, HMDB002294, HMDB03733, HMDB11652, HMDB12580, HMDB12601, HMDB12638, HMDB12777, HMDB12855, HMDB30147, HMDB30455, HMDB40955, HMDB40956                                                                                                                                                                                                                                                                                          | Resolvin D2                                        | 0,052051556                     | 0,700336904 | 0,847843971       |
| 375,2906519 | HMDB0000381, HMDB0000713, HMDB0000717, HMDB0000761, HMDB0002431, HMDB0002492, HMDB00381, HMDB00713, HMDB00717, HMDB00761, HMDB02431, HMDB02492                                                                                                                                                                                                                                                                                                                                                                                                                                           | Allolithocholic acid                               | 0,112748912                     | 0,558547822 | 0,757470764       |
| 377,1937339 | HMDB0003933, HMDB03933                                                                                                                                                                                                                                                                                                                                                                                                                                                                                                                                                                   | Pentosidine                                        | 0,02882108                      | 0,183480101 | 0,417740595       |
| 377,2122245 | HMDB0031978, HMDB31978                                                                                                                                                                                                                                                                                                                                                                                                                                                                                                                                                                   | Methyl (9Z)-6"-oxo-6,6"-diapo-6-carotenoate        | 0,178133798                     | 0,704724439 | 0,851135333       |
| 377,2350817 | HMDB0035508, HMDB35508                                                                                                                                                                                                                                                                                                                                                                                                                                                                                                                                                                   | Annoglabin F                                       | 0,08188867                      | 0,837447666 | 0,921212686       |
| 378,2391411 | HMDB0000277, HMDB00277, HMDB0059630, HMDB0062531, HMDB59630, HMDB62531                                                                                                                                                                                                                                                                                                                                                                                                                                                                                                                   | Sphingosine 1-phosphate                            | -0,061235705                    | 0,651920242 | 0,812106359       |
| 378,2648753 | HMDB0002304, HMDB02304                                                                                                                                                                                                                                                                                                                                                                                                                                                                                                                                                                   | Leukotriene B4 ethanolamide                        | 0,193104584                     | 0,012184434 | 0,070363088       |
| 379,2029308 | HMDB0015696, HMDB15696                                                                                                                                                                                                                                                                                                                                                                                                                                                                                                                                                                   | Bopindolol                                         | 0,292433864                     | 0,119249401 | 0,317028895       |
| 381,0050566 | HMDB0060600, HMDB60600                                                                                                                                                                                                                                                                                                                                                                                                                                                                                                                                                                   | Olsalazine-O-sulfate                               | 0,095397488                     | 0,515511664 | 0,730874126       |
| 381,3001521 | HMDB0011544, HMDB0011574, HMDB0035959, HMDB0036865, HMDB11544, HMDB11574, HMDB35959, HMDB36865                                                                                                                                                                                                                                                                                                                                                                                                                                                                                           | MG(0:0/20:2(11Z,14Z))/(                            | 0,139453239                     | 0,198784027 | 0,44219304        |
| 382,0274532 | HMDB0015427, HMDB15427                                                                                                                                                                                                                                                                                                                                                                                                                                                                                                                                                                   | Ceftizoxime                                        | -0,194357773                    | 0,096253082 | 0,272508727       |
| 383,0626471 | HMDB0040571, HMDB0129411, HMDB0129412, HMDB40571                                                                                                                                                                                                                                                                                                                                                                                                                                                                                                                                         | 2-O-Feruloylhydroxycitric acid                     | 0,329608654                     | 0,051664463 | 0,184636933       |
| 383,1510594 | HMDB0035427, HMDB0040809, HMDB0040834, HMDB0041100, HMDB0041417, HMDB35427, HMDB40809, HMDB40834, HMDB41100, HMDB41417                                                                                                                                                                                                                                                                                                                                                                                                                                                                   | Glicoisoflavanone                                  | -0,037763844                    | 0,847281545 | 0,927013183       |
| 383,1954507 | HMDB0061005, HMDB61005                                                                                                                                                                                                                                                                                                                                                                                                                                                                                                                                                                   | repaglinide aromatic amine                         | 0,00668308                      | 0,957678131 | 0,982465095       |
| 383,2071295 | HMDB0012643, HMDB0036010, HMDB12643, HMDB36010                                                                                                                                                                                                                                                                                                                                                                                                                                                                                                                                           | 20-Trihydroxy-leukotriene-B4                       | -0,020284511                    | 0,970090331 | 0,985816982       |
| 383,2348796 | HMDB0033523, HMDB33523                                                                                                                                                                                                                                                                                                                                                                                                                                                                                                                                                                   | (-)-Pyrifolidine                                   | -0,0876253                      | 0,521992505 | 0,735917092       |
| 383,3513578 | HMDB0039540, HMDB39540                                                                                                                                                                                                                                                                                                                                                                                                                                                                                                                                                                   | Cerebronic acid                                    | 0,074433559                     | 0,68231631  | 0,836821128       |
| 384,2743126 | HMDB0013330, HMDB13330                                                                                                                                                                                                                                                                                                                                                                                                                                                                                                                                                                   | 3-Hydroxy-cis-5-tetradecenoylcarnitine             | 0,164509517                     | 0,044259751 | 0,168598232       |
| 384,3102698 | HMDB0062517, HMDB62517                                                                                                                                                                                                                                                                                                                                                                                                                                                                                                                                                                   | Pentadecanoylcarnitine                             | 0,021182479                     | 0,830859987 | 0,919098001       |
| 385,1656954 | HMDB0030810, HMDB0035404, HMDB0035405, HMDB30810, HMDB35404, HMDB35405                                                                                                                                                                                                                                                                                                                                                                                                                                                                                                                   | Porson                                             | 0,139202277                     | 1,48495E-09 | 2,9748E-07        |
| 385,33077   | HMDB0011147, HMDB0011542, HMDB0011572, HMDB0072854, HMDB0072859, HMDB11147, HMDB11542, HMDB11572, HMDB72854, HMDB72859                                                                                                                                                                                                                                                                                                                                                                                                                                                                   | DG(18:0e/2:0/0:0)                                  | 0,26456799                      | 0,118256574 | 0,315655041       |
| 387,2013847 | HMDB0031676, HMDB0036318, HMDB0036846, HMDB0038306, HMDB0040614, HMDB31676, HMDB36318, HMDB36846, HMDB38306, HMDB40614                                                                                                                                                                                                                                                                                                                                                                                                                                                                   | 5a,6a-Epoxy-7E-megastigmene-3a,9e-diol 3-glucoside | -0,062304978                    | 0,334251902 | 0,594134913       |
| 387,3274266 | HMDB0036371, HMDB36371                                                                                                                                                                                                                                                                                                                                                                                                                                                                                                                                                                   | 3-Hydroxy-1-phenyl-1-eicosanone                    | 0,244746949                     | 0,225336354 | 0,473219052       |
| 391,1527045 | HMDB0030655, HMDB30655                                                                                                                                                                                                                                                                                                                                                                                                                                                                                                                                                                   | Calabaxanthone                                     | 0,055432978                     | 0,171488056 | 0,406352133       |

Supplementary Appendix  
MIRA Study

| m/z         | HMDB ID alternatives                                                                                                                                                                                                                                                                                                                                                                                                                                                                            | Suggested annotation                                                                                                   | Comparison [vegan] - [omnivore] |             |                   |
|-------------|-------------------------------------------------------------------------------------------------------------------------------------------------------------------------------------------------------------------------------------------------------------------------------------------------------------------------------------------------------------------------------------------------------------------------------------------------------------------------------------------------|------------------------------------------------------------------------------------------------------------------------|---------------------------------|-------------|-------------------|
|             |                                                                                                                                                                                                                                                                                                                                                                                                                                                                                                 |                                                                                                                        | Fold Change (log2)              | p-value     | p-value (BH adj.) |
| 391,261884  | HMDB0039019, HMDB39019                                                                                                                                                                                                                                                                                                                                                                                                                                                                          | 3-Hydroxy-10 <sup>n</sup> -apo-b,<br>y-carotenal                                                                       | 0,535933755                     | 0,002957054 | 0,025279914       |
| 393,1347415 | HMDB0029510, HMDB0034436, HMDB29510, HMDB34436                                                                                                                                                                                                                                                                                                                                                                                                                                                  | Garcinone B                                                                                                            | 0,21310786                      | 0,162263022 | 0,391847917       |
| 395,0098337 | HMDB0128825, HMDB0131940, HMDB0133829                                                                                                                                                                                                                                                                                                                                                                                                                                                           | [3-(3,5,7-trihydroxy-6-methoxy-4-oxo-4H-chromen-2-yl)phenyl]oxidanesulfonic acid                                       | 0,128478276                     | 0,001283589 | 0,014168221       |
| 395,1532407 | HMDB0030900, HMDB30900                                                                                                                                                                                                                                                                                                                                                                                                                                                                          | Eremopetasitenin A2                                                                                                    | 0,203185598                     | 0,386551901 | 0,637189523       |
| 395,1842362 | HMDB0039042, HMDB0040305, HMDB0040312, HMDB39042, HMDB40305, HMDB40312                                                                                                                                                                                                                                                                                                                                                                                                                          | (3 <sup>n</sup> x,5 <sup>n</sup> a,9 <sup>n</sup> x,10 <sup>n</sup> b)-O-(3-Hydroxy-6-oxo-7-drimen-11-yl)umbelliferone | -0,058938641                    | 0,581428908 | 0,762836399       |
| 397,9882749 | HMDB0000793, HMDB00793                                                                                                                                                                                                                                                                                                                                                                                                                                                                          | Monoiodothyronine                                                                                                      | -0,108560865                    | 0,12182835  | 0,321922185       |
| 399,1667996 | HMDB0030975, HMDB30975                                                                                                                                                                                                                                                                                                                                                                                                                                                                          | Corchoionoside B                                                                                                       | 0,037831075                     | 0,778491932 | 0,889038232       |
| 399,2518514 | HMDB0012518, HMDB0030065, HMDB12518, HMDB30065                                                                                                                                                                                                                                                                                                                                                                                                                                                  | 11 <sup>n</sup> -Carboxy-gamma-tocotrienol                                                                             | 0,266373405                     | 0,090671533 | 0,265936044       |
| 401,208407  | HMDB0060583, HMDB60583                                                                                                                                                                                                                                                                                                                                                                                                                                                                          | Trandolaprilat                                                                                                         | 0,193224207                     | 0,418043023 | 0,658002736       |
| 401,2929877 | HMDB0029887, HMDB29887                                                                                                                                                                                                                                                                                                                                                                                                                                                                          | Sorbitan palmitate                                                                                                     | 0,253749109                     | 0,072835094 | 0,223634515       |
| 401,3412194 | HMDB0001419, HMDB0001496, HMDB0002103, HMDB0002902, HMDB0004035, HMDB0006119, HMDB0006247, HMDB0006283, HMDB0006892, HMDB0011643, HMDB0013643, HMDB0029320, HMDB0034254, HMDB0035681, HMDB0038959, HMDB0039868, HMDB0039869, HMDB0039870, HMDB0059592, HMDB0062328, HMDB01419, HMDB01496, HMDB02103, HMDB02902, HMDB04035, HMDB06119, HMDB06247, HMDB06283, HMDB06892, HMDB11643, HMDB13643, HMDB29320, HMDB34254, HMDB35681, HMDB38959, HMDB39868, HMDB39869, HMDB39870, HMDB59592, HMDB62328  | 24-Hydroxycholesterol                                                                                                  | 0,530933376                     | 0,000600422 | 0,007862977       |
| 403,3560384 | HMDB0006893, HMDB0031035, HMDB0036844, HMDB06893, HMDB31035, HMDB36844                                                                                                                                                                                                                                                                                                                                                                                                                          | 3a,7a-Dihydroxy-5b-cholestane                                                                                          | 0,438112287                     | 0,090881813 | 0,265936044       |
| 405,1719886 | HMDB0030628, HMDB0030778, HMDB0030779, HMDB0030780, HMDB0033099, HMDB0033536, HMDB0033611, HMDB0034269, HMDB0034917, HMDB0037444, HMDB0038875, HMDB0038876, HMDB30628, HMDB30778, HMDB30779, HMDB30780, HMDB33099, HMDB33536, HMDB33611, HMDB34269, HMDB34917, HMDB37444, HMDB38875, HMDB38876                                                                                                                                                                                                  | Rubraflavone A                                                                                                         | 0,307586783                     | 1,70573E-09 | 2,9748E-07        |
| 405,2626856 | HMDB0000391, HMDB0000400, HMDB0000502, HMDB0033399, HMDB0035288, HMDB00391, HMDB00400, HMDB00502, HMDB0062680, HMDB33399, HMDB35288, HMDB62680                                                                                                                                                                                                                                                                                                                                                  | 7-Ketodeoxycholic acid                                                                                                 | 0,406043752                     | 0,501903953 | 0,722211629       |
| 405,33719   | HMDB0112081                                                                                                                                                                                                                                                                                                                                                                                                                                                                                     | 3,4-Dimethyl-5-pentyl-2-furanpentadecanoic acid                                                                        | 0,319800122                     | 0,164656994 | 0,393372324       |
| 407,1460453 | HMDB0060830, HMDB60830                                                                                                                                                                                                                                                                                                                                                                                                                                                                          | Melatonin glucuronide                                                                                                  | 0,042813473                     | 0,077327591 | 0,234130761       |
| 411,1233944 | HMDB0013842, HMDB13842                                                                                                                                                                                                                                                                                                                                                                                                                                                                          | O-Deethylated candesartan                                                                                              | -0,196064254                    | 0,150702615 | 0,379805436       |
| 411,157257  | HMDB0033467, HMDB33467                                                                                                                                                                                                                                                                                                                                                                                                                                                                          | Dicaffeoylputrescine                                                                                                   | -0,46457031                     | 0,033677322 | 0,143415452       |
| 411,1738874 | HMDB0014725, HMDB14725                                                                                                                                                                                                                                                                                                                                                                                                                                                                          | Cinalukast                                                                                                             | -0,250289574                    | 0,14832131  | 0,374887486       |
| 411,1862219 | HMDB0041512, HMDB41512                                                                                                                                                                                                                                                                                                                                                                                                                                                                          | Isopentyl gentiobioside                                                                                                | -0,098376627                    | 0,658901973 | 0,818465129       |
| 411,2403395 | HMDB0003752, HMDB03752                                                                                                                                                                                                                                                                                                                                                                                                                                                                          | LysoPC(10:0)                                                                                                           | 0,192424807                     | 0,057863583 | 0,19709783        |
| 411,3464245 | HMDB0011552, HMDB0011582, HMDB11552, HMDB11582                                                                                                                                                                                                                                                                                                                                                                                                                                                  | MG(0:0/22:1(13Z)/0:0)                                                                                                  | 0,889909209                     | 0,047915161 | 0,174912962       |
| 413,2693583 | HMDB0012516, HMDB0030041, HMDB0030140, HMDB12516, HMDB30041, HMDB30140                                                                                                                                                                                                                                                                                                                                                                                                                          | 11 <sup>n</sup> -Carboxy-alpha-tocotrienol                                                                             | 0,512943021                     | 0,004128826 | 0,031307269       |
| 413,3263055 | HMDB0092907, HMDB0092908, HMDB0092909, HMDB0092910, HMDB0092911, HMDB0092912, HMDB0093139, HMDB0093140, HMDB0093141, HMDB0093142, HMDB0093143, HMDB0093144, HMDB92907, HMDB92908, HMDB92909, HMDB92910, HMDB92911, HMDB92912, HMDB93139, HMDB93140, HMDB93141, HMDB93142, HMDB93143, HMDB93144                                                                                                                                                                                                  | DG(8:0/13:0/0:0)                                                                                                       | 0,849498815                     | 0,056506153 | 0,194843845       |
| 415,3211291 | HMDB0000430, HMDB0001420, HMDB0001903, HMDB0002197, HMDB0006226, HMDB0006720, HMDB0012453, HMDB0012457, HMDB0012459, HMDB0015046, HMDB0030024, HMDB0030047, HMDB0030048, HMDB0035300, HMDB004030, HMDB0060133, HMDB0060425, HMDB0060508, HMDB0062401, HMDB0062610, HMDB0062736, HMDB01420, HMDB01903, HMDB02197, HMDB06226, HMDB06720, HMDB12453, HMDB12457, HMDB12459, HMDB15046, HMDB30024, HMDB30047, HMDB30048, HMDB35300, HMDB60133, HMDB60425, HMDB60508, HMDB62401, HMDB62610, HMDB62736 | 24,25-Dihydroxyvitamin D                                                                                               | 0,387374839                     | 0,04543645  | 0,168598232       |
| 417,2986018 | HMDB0012515, HMDB0039317, HMDB12515, HMDB39317                                                                                                                                                                                                                                                                                                                                                                                                                                                  | 11 <sup>n</sup> -Carboxy-alpha-chromanol                                                                               | 0,893428112                     | 2,04049E-06 | 6,59001E-05       |
| 417,3168831 | HMDB0035686, HMDB35686                                                                                                                                                                                                                                                                                                                                                                                                                                                                          | beta-Citraurinine                                                                                                      | 0,830030015                     | 6,0644E-06  | 0,000170586       |
| 418,2954642 | HMDB0006463, HMDB0062340, HMDB06463, HMDB62340                                                                                                                                                                                                                                                                                                                                                                                                                                                  | Stearidonyl carnitine                                                                                                  | 0,546099745                     | 4,11203E-06 | 0,000123644       |
| 420,1605268 | HMDB0041991, HMDB41991                                                                                                                                                                                                                                                                                                                                                                                                                                                                          | Pitavastatin                                                                                                           | -0,080706511                    | 0,941236254 | 0,977092874       |
| 420,3095449 | HMDB0006318, HMDB0006319, HMDB06318, HMDB06319                                                                                                                                                                                                                                                                                                                                                                                                                                                  | Gamma-linolenyl carnitine                                                                                              | 0,348142501                     | 0,025209738 | 0,116156048       |
| 421,2263588 | HMDB0032386, HMDB32386                                                                                                                                                                                                                                                                                                                                                                                                                                                                          | 2-Methylacetophenone                                                                                                   | -0,025698624                    | 0,416687007 | 0,657054376       |
| 421,2717009 | HMDB0011142, HMDB11142                                                                                                                                                                                                                                                                                                                                                                                                                                                                          | DHAP(18:0e)                                                                                                            | 0,098087062                     | 0,528988361 | 0,743996533       |

Supplementary Appendix  
MIRA Study

| m/z         | HMDB ID alternatives                                                                                                                                                                                                                                                                                                                                                                                                                     | Suggested annotation                                                                                     | Comparison [vegan] - [omnivore] |             |                   |
|-------------|------------------------------------------------------------------------------------------------------------------------------------------------------------------------------------------------------------------------------------------------------------------------------------------------------------------------------------------------------------------------------------------------------------------------------------------|----------------------------------------------------------------------------------------------------------|---------------------------------|-------------|-------------------|
|             |                                                                                                                                                                                                                                                                                                                                                                                                                                          |                                                                                                          | Fold Change (log2)              | p-value     | p-value (BH adj.) |
| 423,1800759 | HMDB0030149, HMDB0030862, HMDB0031743, HMDB0031917, HMDB0036596, HMDB0037097, HMDB0038868, HMDB0041259, HMDB0129603, HMDB0132647, HMDB0133035, HMDB0133036, HMDB0133037, HMDB0133038, HMDB0133039, HMDB0133062, HMDB0133063, HMDB0133064, HMDB0133065, HMDB0133066, HMDB0133068, HMDB0133069, HMDB0133070, HMDB0133071, HMDB0133072, HMDB0134737, HMDB0149, HMDB030862, HMDB31743, HMDB31917, HMDB36596, HMDB37097, HMDB38868, HMDB41259 | Gliisoflavanone                                                                                          | 0,035412137                     | 0,072601134 | 0,223634515       |
| 423,2761677 | HMDB0000307, HMDB0000311, HMDB0000316, HMDB0000340, HMDB0000367, HMDB0000377, HMDB0000399, HMDB0000433, HMDB0000437, HMDB0013158, HMDB0013192, HMDB00307, HMDB003011, HMDB00316, HMDB00340, HMDB00342, HMDB00367, HMDB00377, HMDB00399, HMDB00433, HMDB00437, HMDB13158, HMDB13192                                                                                                                                                       | 1b-Hydroxychohic acid                                                                                    | 0,169481617                     | 0,4858406   | 0,710703477       |
| 423,3282422 | HMDB0006327, HMDB0038656, HMDB06327, HMDB38656                                                                                                                                                                                                                                                                                                                                                                                           | Alpha-Tocotrienol                                                                                        | 0,51453208                      | 0,103909643 | 0,290414131       |
| 424,3804836 | HMDB0013310, HMDB13310                                                                                                                                                                                                                                                                                                                                                                                                                   | Tetracosanoylglycine                                                                                     | 0,70489952                      | 0,042168479 | 0,164155864       |
| 425,1094647 | HMDB0130070, HMDB0130073, HMDB0130076, HMDB0130077, HMDB0130078, HMDB0130082, HMDB0130085, HMDB0130086, HMDB0130087                                                                                                                                                                                                                                                                                                                      | 6-[3-(1,2-dihydroxybutyl)-1-oxo-1H-isochromen-7-yl]oxy-3,4,5-trihydroxyoxane-2-carboxylic acid           | 0,167142312                     | 0,457832162 | 0,691905798       |
| 425,1415469 | HMDB0003556, HMDB03556                                                                                                                                                                                                                                                                                                                                                                                                                   | Chitobiose                                                                                               | 0,108669536                     | 2,01403E-06 | 6,59001E-05       |
| 427,1832329 | HMDB0000851, HMDB00851                                                                                                                                                                                                                                                                                                                                                                                                                   | Pyridinoline                                                                                             | 0,089272724                     | 0,040617254 | 0,162469015       |
| 427,212941  | HMDB0030158, HMDB30158                                                                                                                                                                                                                                                                                                                                                                                                                   | Austalide L                                                                                              | 0,225824249                     | 0,571732142 | 0,762286527       |
| 427,306788  | HMDB0029886, HMDB0032298, HMDB29886, HMDB32298                                                                                                                                                                                                                                                                                                                                                                                           | Sorbitan oleate                                                                                          | 0,492328792                     | 0,068436786 | 0,214705473       |
| 429,0811032 | HMDB0033587, HMDB0041717, HMDB0041718, HMDB0127308, HMDB0129981, HMDB0132466, HMDB0132467, HMDB0133342, HMDB0133343, HMDB0134552, HMDB0134553, HMDB0134554, HMDB0134555, HMDB0134556, HMDB0134557, HMDB0134558, HMDB0134559, HMDB0134561, HMDB0134562, HMDB0134563, HMDB0134564, HMDB33587, HMDB41717, HMDB41718                                                                                                                         | Coumestrin                                                                                               | 0,307789354                     | 0,470099256 | 0,700188213       |
| 429,1051474 | HMDB0128698, HMDB0128702, HMDB0128706, HMDB0128714                                                                                                                                                                                                                                                                                                                                                                                       | 6-[1-(6,7-dimethoxy-2H-1,3-benzodioxol-5-yl)-3-oxopropoxy]-3,4,5-trihydroxyoxane-2-carboxylic acid       | -0,12841299                     | 0,111777924 | 0,301765788       |
| 429,3009996 | HMDB0011590, HMDB0012458, HMDB0030066, HMDB0034403, HMDB0036249, HMDB0060127, HMDB0060128, HMDB11590, HMDB12458, HMDB30066, HMDB34403, HMDB36249, HMDB60127, HMDB60128                                                                                                                                                                                                                                                                   | MG(24:6(6Z,9Z,12Z,15Z))                                                                                  | 0,590756513                     | 0,002824782 | 0,024388218       |
| 429,3166218 | HMDB0035640, HMDB35640                                                                                                                                                                                                                                                                                                                                                                                                                   | Sintaxanthin                                                                                             | 0,499273162                     | 0,014330071 | 0,077613799       |
| 429,3729036 | HMDB0001893, HMDB0012171, HMDB0030022, HMDB0059642, HMDB0062391, HMDB01893, HMDB12171, HMDB30022, HMDB59642, HMDB62391                                                                                                                                                                                                                                                                                                                   | Alpha-Tocopherol                                                                                         | -0,097452024                    | 0,015646781 | 0,083309158       |
| 431,2206675 | HMDB0062316, HMDB0062320, HMDB0114743, HMDB0114744, HMDB62316, HMDB62320                                                                                                                                                                                                                                                                                                                                                                 | 1-(6Z,9Z,12Z-octadecatrienoyl)-glycero-3-phosphate                                                       | 0,049344245                     | 0,227331559 | 0,474056558       |
| 431,3149368 | HMDB0006228, HMDB0012454, HMDB0030702, HMDB0033769, HMDB0060134, HMDB0062211, HMDB0062399, HMDB0062400, HMDB0062686, HMDB0062712, HMDB06228, HMDB12454, HMDB30702, HMDB33769, HMDB60134, HMDB62211, HMDB62399, HMDB62400, HMDB62686, HMDB62712                                                                                                                                                                                           | 24-Hydroxycalcitriol                                                                                     | 0,81492011                      | 0,009713956 | 0,058417721       |
| 433,2043793 | HMDB0061126, HMDB61126                                                                                                                                                                                                                                                                                                                                                                                                                   | 4,5-Dihydro-drosiprenone-3-sulfate                                                                       | -0,108390811                    | 0,30301867  | 0,563395054       |
| 433,2343739 | HMDB0007852, HMDB0007856, HMDB07852, HMDB07856                                                                                                                                                                                                                                                                                                                                                                                           | LPA(0:0/18:2(9Z,12Z))                                                                                    | 0,155823057                     | 0,102948975 | 0,28916431        |
| 433,2597393 | HMDB003030, HMDB0040389, HMDB33030, HMDB40389                                                                                                                                                                                                                                                                                                                                                                                            | (12S,15S)-15-O-Demethyl-10,29-dideoxy-11,12-dihydro-striatin C                                           | 0,102189008                     | 0,961362788 | 0,983929989       |
| 433,3309576 | HMDB0000359, HMDB0003533, HMDB00359, HMDB0062208, HMDB01974, HMDB03533, HMDB06263, HMDB62208                                                                                                                                                                                                                                                                                                                                             | 3a,7a-Dihydrocycoprostanic acid                                                                          | 0,671949487                     | 0,012980404 | 0,073025243       |
| 435,2510421 | HMDB0007851, HMDB0007855, HMDB0011133, HMDB00443, HMDB07851, HMDB07855, HMDB11133                                                                                                                                                                                                                                                                                                                                                        | LPA(0:0/18:1(9Z))                                                                                        | 0,103363798                     | 0,304581654 | 0,563896395       |
| 437,1394194 | HMDB0129155, HMDB0129156, HMDB0129157, HMDB0129165, HMDB0129166, HMDB0129167, HMDB0129172, HMDB0129173, HMDB0129174, HMDB0129178, HMDB0129182, HMDB0129183, HMDB0129184, HMDB0129189, HMDB0129190, HMDB0129191, HMDB0129195, HMDB0129199, HMDB0135817, HMDB0135818, HMDB0135819, HMDB0135824, HMDB0135825, HMDB0135826, HMDB0135831, HMDB0135832, HMDB0135833                                                                            | 3-(3-hydroxyphenyl)-2-(4-hydroxyphenyl)-4-[(E)-2-(4-hydroxyphenyl)ethenyl]-2,3-dihydro-1-benzofuran-6-ol | 0,268862844                     | 0,25029098  | 0,504050196       |
| 437,3257177 | HMDB0002126, HMDB02126                                                                                                                                                                                                                                                                                                                                                                                                                   | 27-Nor-5b-cholestane-3a,7a,12a,24,25-pentol                                                              | 0,961046923                     | 0,006135379 | 0,041473261       |
| 439,1531185 | HMDB0014934, HMDB14934                                                                                                                                                                                                                                                                                                                                                                                                                   | Candesartan                                                                                              | 0,042022709                     | 0,898796745 | 0,959303258       |
| 440,1568366 | HMDB0032803, HMDB32803                                                                                                                                                                                                                                                                                                                                                                                                                   | Mandelonitrile rutinoside                                                                                | -0,035560987                    | 0,343687943 | 0,603009832       |



Supplementary Appendix  
MIRA Study

| m/z         | HMDB ID alternatives                                                                                                                                                                                                                                                                                                                                                                                                                                                                                                                                                                                                                                                                                                                                                                                                                                                                   | Suggested annotation                                                                                                                          | Comparison [vegan] - [omnivore] |             |                   |
|-------------|----------------------------------------------------------------------------------------------------------------------------------------------------------------------------------------------------------------------------------------------------------------------------------------------------------------------------------------------------------------------------------------------------------------------------------------------------------------------------------------------------------------------------------------------------------------------------------------------------------------------------------------------------------------------------------------------------------------------------------------------------------------------------------------------------------------------------------------------------------------------------------------|-----------------------------------------------------------------------------------------------------------------------------------------------|---------------------------------|-------------|-------------------|
|             |                                                                                                                                                                                                                                                                                                                                                                                                                                                                                                                                                                                                                                                                                                                                                                                                                                                                                        |                                                                                                                                               | Fold Change (log2)              | p-value     | p-value (BH adj.) |
| 465,3037931 | HMDB0000653, HMDB00653                                                                                                                                                                                                                                                                                                                                                                                                                                                                                                                                                                                                                                                                                                                                                                                                                                                                 | Cholesterol sulfate                                                                                                                           | -0.39641202                     | 2.34835E-05 | 0.000585075       |
| 465,984622  | HMDB0000998, HMDB00998                                                                                                                                                                                                                                                                                                                                                                                                                                                                                                                                                                                                                                                                                                                                                                                                                                                                 | dCTP                                                                                                                                          | -0.057723895                    | 0,050053679 | 0,179616493       |
| 466,1742006 | HMDB0031949, HMDB31949                                                                                                                                                                                                                                                                                                                                                                                                                                                                                                                                                                                                                                                                                                                                                                                                                                                                 | Bis-N-butyl phthalate                                                                                                                         | 0,070918776                     | 0,25746767  | 0,514590464       |
| 466,3069931 | HMDB0042042, HMDB42042                                                                                                                                                                                                                                                                                                                                                                                                                                                                                                                                                                                                                                                                                                                                                                                                                                                                 | Tiropamide                                                                                                                                    | -0.401242601                    | 1,9728E-06  | 6,59001E-05       |
| 467,9448605 | HMDB0060640, HMDB60640                                                                                                                                                                                                                                                                                                                                                                                                                                                                                                                                                                                                                                                                                                                                                                                                                                                                 | Lamivudine-triphosphate                                                                                                                       | 0,077296921                     | 0,749318056 | 0,872880287       |
| 469,1508235 | HMDB0129028, HMDB0129029                                                                                                                                                                                                                                                                                                                                                                                                                                                                                                                                                                                                                                                                                                                                                                                                                                                               | 3,4,5-trihydroxy-6-3-hydroxy-5-[(E)-2-(4-hydroxyphenyl)ethenyl]-2-[(1E)-3-methylbuta-1,3-dien-1-yl]phenoxyoxane-2-carboxylic acid             | 0,115872838                     | 0,000661246 | 0,008356613       |
| 469,2246795 | HMDB0038199, HMDB38199                                                                                                                                                                                                                                                                                                                                                                                                                                                                                                                                                                                                                                                                                                                                                                                                                                                                 | Lucidic acid D1                                                                                                                               | 0,390524693                     | 0,062471778 | 0,204664919       |
| 469,258412  | HMDB0003218, HMDB0034415, HMDB0036437, HMDB03218, HMDB34415, HMDB36437                                                                                                                                                                                                                                                                                                                                                                                                                                                                                                                                                                                                                                                                                                                                                                                                                 | Withanolide                                                                                                                                   | 0,417569333                     | 0,035438206 | 0,147857013       |
| 471,0949294 | HMDB0038363, HMDB0040293, HMDB38363, HMDB40293                                                                                                                                                                                                                                                                                                                                                                                                                                                                                                                                                                                                                                                                                                                                                                                                                                         | (-)-Epigallocatechin 3-(3-methyl-gallate)                                                                                                     | -0,170069725                    | 0,293669053 | 0,554284447       |
| 471,2425658 | HMDB0002522, HMDB0002586, HMDB0002642, HMDB02522, HMDB02586, HMDB02642                                                                                                                                                                                                                                                                                                                                                                                                                                                                                                                                                                                                                                                                                                                                                                                                                 | Chenodeoxycholic acid sulfate                                                                                                                 | 0,283508128                     | 0,301508179 | 0,561857104       |
| 471,3464307 | HMDB0002392, HMDB0033233, HMDB0034523, HMDB0034530, HMDB0034567, HMDB0035106, HMDB0035107, HMDB0035258, HMDB0035260, HMDB0035748, HMDB0035758, HMDB0035962, HMDB0035977, HMDB0036001, HMDB0036063, HMDB0036064, HMDB0036638, HMDB0036654, HMDB0037779, HMDB0041043, HMDB02392, HMDB33233, HMDB34523, HMDB34530, HMDB34567, HMDB35106, HMDB35107, HMDB35258, HMDB35260, HMDB35748, HMDB35758, HMDB35962, HMDB35977, HMDB36001, HMDB36063, HMDB36064, HMDB36638, HMDB36654, HMDB37779, HMDB41043                                                                                                                                                                                                                                                                                                                                                                                         | Maslinic acid                                                                                                                                 | 1,093634283                     | 0,000899013 | 0,010593775       |
| 473,3616716 | HMDB0034505, HMDB0034528, HMDB0034644, HMDB0034683, HMDB0035326, HMDB0039692, HMDB34505, HMDB34528, HMDB34644, HMDB34683, HMDB35326, HMDB39692                                                                                                                                                                                                                                                                                                                                                                                                                                                                                                                                                                                                                                                                                                                                         | Soyasapogenol A                                                                                                                               | 1,185193096                     | 0,001796342 | 0,018214069       |
| 474,2847152 | HMDB0014907, HMDB14907                                                                                                                                                                                                                                                                                                                                                                                                                                                                                                                                                                                                                                                                                                                                                                                                                                                                 | Hydrocortamate                                                                                                                                | 0,195267922                     | 0,160100469 | 0,388879134       |
| 477,1044483 | HMDB0029479, HMDB0030548, HMDB0030805, HMDB0033650, HMDB0036120, HMDB0037332, HMDB0037360, HMDB0039190, HMDB0039211, HMDB0039338, HMDB0040509, HMDB0040510, HMDB0041743, HMDB0041745, HMDB0126054, HMDB0126055, HMDB0126056, HMDB0126057, HMDB0126140, HMDB0126573, HMDB0126590, HMDB0126591, HMDB0126596, HMDB0126597, HMDB0127510, HMDB0127511, HMDB0127513, HMDB0127514, HMDB0128063, HMDB0128064, HMDB0128065, HMDB0128066, HMDB0128067, HMDB0128068, HMDB0128549, HMDB0128597, HMDB0128598, HMDB0128599, HMDB0129310, HMDB0129320, HMDB0129425, HMDB0129989, HMDB0129990, HMDB0129991, HMDB0130192, HMDB0130193, HMDB0130194, HMDB0130195, HMDB0130196, HMDB0130197, HMDB0133822, HMDB0133842, HMDB0133844, HMDB0137325, HMDB29479, HMDB30548, HMDB30805, HMDB33650, HMDB36120, HMDB37332, HMDB37360, HMDB39190, HMDB39211, HMDB39338, HMDB40509, HMDB40510, HMDB41743, HMDB41745 | Isorhamnetin 7-glucoside                                                                                                                      | 0,086610458                     | 0,477138962 | 0,706392487       |
| 477,1941983 | HMDB0032771, HMDB0032774, HMDB32771, HMDB32774                                                                                                                                                                                                                                                                                                                                                                                                                                                                                                                                                                                                                                                                                                                                                                                                                                         | Eremopetasitenin C2                                                                                                                           | 0,161970646                     | 0,706750805 | 0,852402078       |
| 478,2919659 | HMDB0011475, HMDB0011476, HMDB0011505, HMDB0011506, HMDB11475, HMDB11476, HMDB11505, HMDB11506                                                                                                                                                                                                                                                                                                                                                                                                                                                                                                                                                                                                                                                                                                                                                                                         | LysoPE(0/0/18:1(11Z))                                                                                                                         | 0,237106152                     | 0,482291882 | 0,709204926       |
| 480,3087099 | HMDB0010381, HMDB0011129, HMDB0011130, HMDB10381, HMDB11129, HMDB11130                                                                                                                                                                                                                                                                                                                                                                                                                                                                                                                                                                                                                                                                                                                                                                                                                 | LysoPC(15:0)                                                                                                                                  | 0,045537613                     | 0,891540789 | 0,954337611       |
| 481,4170523 | HMDB0038961, HMDB38961                                                                                                                                                                                                                                                                                                                                                                                                                                                                                                                                                                                                                                                                                                                                                                                                                                                                 | N-[2-(1H-Indol-3-yl)ethyl]docosanamide                                                                                                        | 0,963774869                     | 0,020097829 | 0,100144611       |
| 482,1585119 | HMDB0133696, HMDB0133697                                                                                                                                                                                                                                                                                                                                                                                                                                                                                                                                                                                                                                                                                                                                                                                                                                                               | 2-amino-4-(1-[(carboxymethyl)-C-hydroxycarbonimidoyl]-2-[(2-hydroxy-2-methyl-3-oxo-1-phenylbutyl)sulfanyl]ethyl)-C-hydroxycarbonimidoyl) acid | 0,096563168                     | 0,458753896 | 0,692099303       |
| 483,1652572 | HMDB0035733, HMDB0125915, HMDB35733                                                                                                                                                                                                                                                                                                                                                                                                                                                                                                                                                                                                                                                                                                                                                                                                                                                    | Dukunolide E                                                                                                                                  | -0,055717279                    | 0,519950025 | 0,73484023        |
| 485,3271059 | HMDB0034526, HMDB0034689, HMDB0035259, HMDB0035261, HMDB0035295, HMDB0036652, HMDB0036851, HMDB0037963, HMDB0038737, HMDB0040499, HMDB0041041, HMDB34526, HMDB34689, HMDB35259, HMDB35261, HMDB35295, HMDB36652, HMDB36851, HMDB37963, HMDB38737, HMDB40499, HMDB41041                                                                                                                                                                                                                                                                                                                                                                                                                                                                                                                                                                                                                 | Bassic acid                                                                                                                                   | 0,837995399                     | 0,006028491 | 0,041385986       |
| 487,2553143 | HMDB0038732, HMDB38732                                                                                                                                                                                                                                                                                                                                                                                                                                                                                                                                                                                                                                                                                                                                                                                                                                                                 | alpha-Ionol O-[arabinosyl-(1->6)-glucoside]                                                                                                   | 0,372360311                     | 0,025442437 | 0,116156048       |
| 489,1756319 | HMDB0130297                                                                                                                                                                                                                                                                                                                                                                                                                                                                                                                                                                                                                                                                                                                                                                                                                                                                            | 3,4,5-trihydroxy-6-(2-[6-(2-methylbut-3-en-2-yl)-7-oxo-2H,3H,7H-furo[3,2-g]chromen-2-yl]propan-2-yloxy)oxane-2-carboxylic acid                | 0,326295612                     | 0,145119613 | 0,368933826       |



Supplementary Appendix  
MIRA Study

| m/z         | HMDB ID alternatives                                                                                                                                                                                                                                                                                                                                                                                                                                                                                                                                                                                                                                                                  | Suggested annotation                                                                                                                              | Comparison [vegan] - [omnivore] |             |                   |
|-------------|---------------------------------------------------------------------------------------------------------------------------------------------------------------------------------------------------------------------------------------------------------------------------------------------------------------------------------------------------------------------------------------------------------------------------------------------------------------------------------------------------------------------------------------------------------------------------------------------------------------------------------------------------------------------------------------|---------------------------------------------------------------------------------------------------------------------------------------------------|---------------------------------|-------------|-------------------|
|             |                                                                                                                                                                                                                                                                                                                                                                                                                                                                                                                                                                                                                                                                                       |                                                                                                                                                   | Fold Change (log2)              | p-value     | p-value (BH adj.) |
| 489,229128  | HMDB0030630, HMDB0129655, HMDB0129656, HMDB0129657, HMDB0129658, HMDB0129659, HMDB0129660, HMDB0129661, HMDB0129662, HMDB0129663, HMDB0129664, HMDB0129665, HMDB30630                                                                                                                                                                                                                                                                                                                                                                                                                                                                                                                 | Rubraflavone C                                                                                                                                    | -0.075749852                    | 0.413297347 | 0.65407493        |
| 489,3569164 | HMDB0034525, HMDB0034532, HMDB0037783, HMDB34525, HMDB34532, HMDB37783                                                                                                                                                                                                                                                                                                                                                                                                                                                                                                                                                                                                                | Barringtonenol C                                                                                                                                  | 1.192811845                     | 0.005160973 | 0.038133139       |
| 493,2068132 | HMDB0033412, HMDB0037084, HMDB0038610, HMDB33412, HMDB37084, HMDB38610                                                                                                                                                                                                                                                                                                                                                                                                                                                                                                                                                                                                                | Gibberellin A20<br>13-glucoside                                                                                                                   | 0.076649567                     | 0.686402486 | 0.840650236       |
| 493,2460777 | HMDB0033655, HMDB33655                                                                                                                                                                                                                                                                                                                                                                                                                                                                                                                                                                                                                                                                | 7,11-Bisdeacetylvaltrate<br>7-(3-methylpentanoate)<br>11-(3-hydroxy-3-methylbutanoate)                                                            | 0.185329058                     | 0.558343792 | 0.757470764       |
| 495,3343124 | HMDB0061702, HMDB0062541, HMDB61702, HMDB62541                                                                                                                                                                                                                                                                                                                                                                                                                                                                                                                                                                                                                                        | 2-Palmitoylglycerophospho                                                                                                                         | 0.718257461                     | 0.012380244 | 0.070559298       |
| 497,3855423 | HMDB0072193, HMDB0072251, HMDB72193, HMDB72251                                                                                                                                                                                                                                                                                                                                                                                                                                                                                                                                                                                                                                        | TG(10:0/8:0/8:0)                                                                                                                                  | 1.201017608                     | 0.108301651 | 0.296110649       |
| 498,2880279 | HMDB0000874, HMDB0000896, HMDB0000951, HMDB00874, HMDB00896, HMDB00951, HMDB04011                                                                                                                                                                                                                                                                                                                                                                                                                                                                                                                                                                                                     | Tauroursodeoxycholic acid                                                                                                                         | 0.172807942                     | 0.891955451 | 0.954337611       |
| 499,2905268 | HMDB0014554, HMDB14554                                                                                                                                                                                                                                                                                                                                                                                                                                                                                                                                                                                                                                                                | Mupirocin                                                                                                                                         | 0.465487606                     | 0.060499249 | 0.202905172       |
| 500,2776121 | HMDB0011487, HMDB0011488, HMDB0011517, HMDB0011518, HMDB11487, HMDB11488, HMDB11517, HMDB11518                                                                                                                                                                                                                                                                                                                                                                                                                                                                                                                                                                                        | LysoPE(0:0/20:4(5Z,8Z,                                                                                                                            | 0.32188588                      | 0.178279469 | 0.414559191       |
| 501,1448255 | HMDB0124742, HMDB0124743, HMDB0124744, HMDB0124745, HMDB0124746, HMDB0124747                                                                                                                                                                                                                                                                                                                                                                                                                                                                                                                                                                                                          | 6-(4,5-dihydroxy-2-methyl-6-(3,4,5,6-tetrahydrooxan-2-yl)methoxy]oxan-3-yloxy)-3,4,5-trihydroxyoxane-2-carboxylic acid                            | 0.009905962                     | 0.805665281 | 0.904170045       |
| 503,1554915 | HMDB0125552, HMDB0125553, HMDB0125554, HMDB0125555, HMDB0125556, HMDB0125558, HMDB0125559, HMDB0125560, HMDB0125561, HMDB0125562, HMDB0125563, HMDB0125564, HMDB0125566, HMDB0125567, HMDB0125568, HMDB0125569, HMDB0125571, HMDB0125572, HMDB0125573, HMDB0125576, HMDB0125577, HMDB0125578, HMDB0129040, HMDB0129041, HMDB0129042, HMDB0129045, HMDB0129046, HMDB0129047, HMDB0129048, HMDB0129049, HMDB0129052, HMDB0129053, HMDB0129054, HMDB0129055, HMDB0129057, HMDB0129058, HMDB0129059, HMDB0129061, HMDB0129062, HMDB0129063, HMDB0129064, HMDB0129066, HMDB0129067, HMDB0129068, HMDB0129073, HMDB0129074, HMDB0129075, HMDB0129080, HMDB0129081, HMDB0129082, HMDB0129571 | 6-6-[(E)-2-(2,4-dihydroxyphenyl)ethenyl]2,4-dihydroxy-3-(3-methylbut-2-en-1-yl)phenoxy-3,4,5-trihydroxyoxane-2-carboxylic acid                    | 0.079018177                     | 0.906340122 | 0.961999186       |
| 503,2607639 | HMDB0127533, HMDB0127534                                                                                                                                                                                                                                                                                                                                                                                                                                                                                                                                                                                                                                                              | (1S,16R)-5,7,11-trihydroxy-8,8,12,16-tetramethyl-3-[1-(2-methyl-1,3-thiazol-4-yl)prop-1-en-2-yl]-10-methylidene-17-oxa-4-azabicyclo[14.1.0]heptac | 0.250791008                     | 0.001955536 | 0.019158135       |
| 504,3086355 | HMDB0011483, HMDB0011513, HMDB11483, HMDB11513                                                                                                                                                                                                                                                                                                                                                                                                                                                                                                                                                                                                                                        | LysoPE(0:0/20:2(11Z,14                                                                                                                            | 0.213758246                     | 0.456378754 | 0.691905798       |
| 505,9798017 | HMDB0001134, HMDB01134                                                                                                                                                                                                                                                                                                                                                                                                                                                                                                                                                                                                                                                                | Phosphoadenosine phosphosulfate                                                                                                                   | 0.100906083                     | 0.372885958 | 0.627715358       |
| 505,9894434 | HMDB0000538, HMDB0001440, HMDB00538, HMDB0059593, HMDB01440, HMDB59593                                                                                                                                                                                                                                                                                                                                                                                                                                                                                                                                                                                                                | ATP                                                                                                                                               | 0.026083855                     | 0.508129697 | 0.727568302       |
| 506,3236281 | HMDB0011482, HMDB0011512, HMDB11482, HMDB11512                                                                                                                                                                                                                                                                                                                                                                                                                                                                                                                                                                                                                                        | LysoPE(0:0/20:1(11Z))                                                                                                                             | 0.224959826                     | 0.217694563 | 0.467560737       |
| 507,1875872 | HMDB0038710, HMDB38710                                                                                                                                                                                                                                                                                                                                                                                                                                                                                                                                                                                                                                                                | (7''R,8''R)-4,7''-Epoxy-3''-methoxy-4'',5,9,9''-lignanetetrol 9''-glucoside                                                                       | 0.060325831                     | 0.965948285 | 0.984003393       |
| 507,2440379 | HMDB0060828, HMDB60828                                                                                                                                                                                                                                                                                                                                                                                                                                                                                                                                                                                                                                                                | ID14326                                                                                                                                           | 0.05191992                      | 0.936957317 | 0.975690018       |
| 508,4715918 | HMDB0011773, HMDB11773                                                                                                                                                                                                                                                                                                                                                                                                                                                                                                                                                                                                                                                                | C14 Cer                                                                                                                                           | -0.144417164                    | 0.176913553 | 0.413276794       |
| 509,2203151 | HMDB0000579, HMDB00579                                                                                                                                                                                                                                                                                                                                                                                                                                                                                                                                                                                                                                                                | Deuteroporphyrin IX                                                                                                                               | 0.075011158                     | 0.055465252 | 0.192692031       |
| 510,2528748 | HMDB0062801, HMDB62801                                                                                                                                                                                                                                                                                                                                                                                                                                                                                                                                                                                                                                                                | Sulfoglycolithocholate(2                                                                                                                          | 0.549110245                     | 1.15774E-06 | 5.04775E-05       |
| 510,2867846 | HMDB0035368, HMDB35368                                                                                                                                                                                                                                                                                                                                                                                                                                                                                                                                                                                                                                                                | Cytochalasin Ppho                                                                                                                                 | 0.335972138                     | 0.00309939  | 0.025987192       |
| 512,2686959 | HMDB0002639, HMDB02639                                                                                                                                                                                                                                                                                                                                                                                                                                                                                                                                                                                                                                                                | Sulfolithocholylglycine                                                                                                                           | 0.306962874                     | 0.486785468 | 0.710703477       |
| 513,356898  | HMDB0034529, HMDB0034647, HMDB0035510, HMDB34529, HMDB34647, HMDB35510                                                                                                                                                                                                                                                                                                                                                                                                                                                                                                                                                                                                                | 16-Acetylpriverogenin A                                                                                                                           | 0.894220719                     | 0.008215721 | 0.052677272       |
| 514,2842715 | HMDB0000036, HMDB0000889, HMDB0000922, HMDB0000932, HMDB00036, HMDB0011637, HMDB00889, HMDB00922, HMDB00932, HMDB11637                                                                                                                                                                                                                                                                                                                                                                                                                                                                                                                                                                | Taurocholic acid                                                                                                                                  | -0.05041993                     | 0.485673449 | 0.710703477       |
| 517,2068451 | HMDB0060499, HMDB60499                                                                                                                                                                                                                                                                                                                                                                                                                                                                                                                                                                                                                                                                | NPC                                                                                                                                               | 0.173385934                     | 0.891047285 | 0.954337611       |
| 517,2491609 | HMDB0012231, HMDB0060469, HMDB12231, HMDB60469                                                                                                                                                                                                                                                                                                                                                                                                                                                                                                                                                                                                                                        | Geranylflarnesyl diphosphate                                                                                                                      | 0.237358176                     | 0.045185413 | 0.168598232       |
| 517,3147262 | HMDB0034392, HMDB0035304, HMDB0035699, HMDB003691, HMDB34392, HMDB35304, HMDB35699, HMDB3691                                                                                                                                                                                                                                                                                                                                                                                                                                                                                                                                                                                          | Perulactone                                                                                                                                       | 0.461308408                     | 0.008976991 | 0.055517278       |
| 517,388468  | HMDB0037781, HMDB37781                                                                                                                                                                                                                                                                                                                                                                                                                                                                                                                                                                                                                                                                | Ganoderiol C                                                                                                                                      | 1.204086717                     | 0.008942473 | 0.055517278       |

Supplementary Appendix  
MIRA Study

| m/z         | HMDB ID alternatives                                                                                                                                                                                                                                                                                                                                                                                                                                                                                                                                                       | Suggested annotation                                                                                                                                     | Comparison [vegan] - [omnivore] |             |                   |
|-------------|----------------------------------------------------------------------------------------------------------------------------------------------------------------------------------------------------------------------------------------------------------------------------------------------------------------------------------------------------------------------------------------------------------------------------------------------------------------------------------------------------------------------------------------------------------------------------|----------------------------------------------------------------------------------------------------------------------------------------------------------|---------------------------------|-------------|-------------------|
|             |                                                                                                                                                                                                                                                                                                                                                                                                                                                                                                                                                                            |                                                                                                                                                          | Fold Change (log2)              | p-value     | p-value (BH adj.) |
| 519,187318  | HMDB0040636, HMDB40636                                                                                                                                                                                                                                                                                                                                                                                                                                                                                                                                                     | (7''S,8''S)-4,7''-Epoxy-3,8''-biligen-7-ene-3''-,5-dimethoxy-4'',9,9''-triol 4''-glucoside                                                               | 0,213163186                     | 0,288934412 | 0,550110933       |
| 521,3503751 | HMDB0061701, HMDB61701                                                                                                                                                                                                                                                                                                                                                                                                                                                                                                                                                     | Oleoylglycerophosphoch                                                                                                                                   | 1,030179447                     | 0,005450851 | 0,03900194        |
| 523,1017965 | HMDB0034318, HMDB0038507, HMDB34318, HMDB38507                                                                                                                                                                                                                                                                                                                                                                                                                                                                                                                             | Sennidin C                                                                                                                                               | 0,199817416                     | 0,403469674 | 0,646738154       |
| 523,298136  | HMDB0003577, HMDB03577                                                                                                                                                                                                                                                                                                                                                                                                                                                                                                                                                     | VPGPR Enterostatin                                                                                                                                       | 0,32873913                      | 0,143822176 | 0,367779876       |
| 524,2764383 | HMDB0011496, HMDB0011526, HMDB11496, HMDB11526                                                                                                                                                                                                                                                                                                                                                                                                                                                                                                                             | LysoPE(0:0/22:6(4Z,7Z,                                                                                                                                   | -0,150148791                    | 0,57583216  | 0,762286527       |
| 527,2650596 | HMDB0033976, HMDB0035797, HMDB0035895, HMDB0037565, HMDB33976, HMDB35797, HMDB35895, HMDB37565                                                                                                                                                                                                                                                                                                                                                                                                                                                                             | Physapubenolide                                                                                                                                          | 0,44752383                      | 0,009255744 | 0,056838093       |
| 527,3367619 | HMDB0033079, HMDB0035225, HMDB0035335, HMDB33079, HMDB35225, HMDB35335                                                                                                                                                                                                                                                                                                                                                                                                                                                                                                     | Ganoderic acid V                                                                                                                                         | 0,648895575                     | 0,009703418 | 0,058417721       |
| 535,3398042 | HMDB0115487, HMDB0115613, HMDB0115689, HMDB0115781                                                                                                                                                                                                                                                                                                                                                                                                                                                                                                                         | PA(8:0/16:0)                                                                                                                                             | 0,112329202                     | 0,375697379 | 0,628197929       |
| 537,4878797 | HMDB0112106, HMDB0112107, HMDB0112111, HMDB0112113, HMDB0112116, HMDB0112118, HMDB0112119, HMDB0112121, HMDB0112146, HMDB0112147, HMDB0112148, HMDB0112149, HMDB0112150, HMDB0112151, HMDB0112152, HMDB0112153, HMDB0112176, HMDB0112179                                                                                                                                                                                                                                                                                                                                   | FAHFA(16:0/9-O-18:0)                                                                                                                                     | 0,523056836                     | 0,195577197 | 0,436172163       |
| 539,4308624 | HMDB0071246, HMDB0071529, HMDB0072647, HMDB0096559, HMDB0096560, HMDB0096561, HMDB71246, HMDB71529, HMDB72647, HMDB96559, HMDB96560, HMDB96561                                                                                                                                                                                                                                                                                                                                                                                                                             | TG(8:0/8:0/a-13:0)[rac]                                                                                                                                  | 1,55648398                      | 0,061163967 | 0,203607508       |
| 541,2639797 | HMDB0010320, HMDB10320                                                                                                                                                                                                                                                                                                                                                                                                                                                                                                                                                     | Cortolone-3-glucuronide                                                                                                                                  | 0,373761962                     | 0,005892689 | 0,041385986       |
| 544,3421734 | HMDB0010393, HMDB0010394, HMDB10393, HMDB10394                                                                                                                                                                                                                                                                                                                                                                                                                                                                                                                             | LysoPC(20:3(5Z,8Z,11Z                                                                                                                                    | -0,009602252                    | 0,250967986 | 0,504249041       |
| 545,3482369 | HMDB0041547, HMDB41547                                                                                                                                                                                                                                                                                                                                                                                                                                                                                                                                                     | Hovenidulcigenin B                                                                                                                                       | 0,50332337                      | 0,05461827  | 0,191146254       |
| 547,1475453 | HMDB0125967, HMDB0125968, HMDB0125969, HMDB0125970, HMDB0125971, HMDB0125972, HMDB0125973, HMDB0125975, HMDB0125976, HMDB0125977, HMDB0125978, HMDB0125979, HMDB0125980, HMDB0125981, HMDB0125982, HMDB0125983, HMDB0125984, HMDB0125985, HMDB0131899, HMDB0132622, HMDB0132623, HMDB0132624, HMDB0132626, HMDB0132628, HMDB0132629, HMDB0132630, HMDB0132631, HMDB0132632, HMDB0132633, HMDB0140256                                                                                                                                                                       | 6-(2-[4,6-dihydroxy-2-methoxy-3-(3-methylbut-2-en-1-yl)phenyl]-6-hydroxy-3-oxo-2,3-dihydro-1-benzofuran-5-yloxy)-3,4,5-trihydroxyoxane-2-carboxylic acid | 0,00506018                      | 0,823334036 | 0,917884016       |
| 550,244849  | HMDB0060622, HMDB60622                                                                                                                                                                                                                                                                                                                                                                                                                                                                                                                                                     | Endoxifen O-glucuronide                                                                                                                                  | 0,30760505                      | 0,27281573  | 0,537009745       |
| 550,389631  | HMDB0010390, HMDB10390                                                                                                                                                                                                                                                                                                                                                                                                                                                                                                                                                     | LysoPC(20:0)                                                                                                                                             | 0,879848863                     | 0,018654668 | 0,095687475       |
| 551,3061451 | HMDB0004309, HMDB04309                                                                                                                                                                                                                                                                                                                                                                                                                                                                                                                                                     | Triterpenoid                                                                                                                                             | 0,402367399                     | 0,185889584 | 0,421027837       |
| 551,3605306 | HMDB0036298, HMDB36298                                                                                                                                                                                                                                                                                                                                                                                                                                                                                                                                                     | Cyclopassifloic acid E                                                                                                                                   | 0,725797073                     | 0,167781788 | 0,398653187       |
| 551,4257115 | HMDB0002268, HMDB0030576, HMDB0030607, HMDB0033844, HMDB0035138, HMDB0035139, HMDB0035836, HMDB0036869, HMDB0036910, HMDB0036917, HMDB0036921, HMDB0036926, HMDB0060443, HMDB02268, HMDB30576, HMDB30607, HMDB33844, HMDB35138, HMDB35139, HMDB35836, HMDB36869, HMDB36910, HMDB36917, HMDB36921, HMDB36926, HMDB60443                                                                                                                                                                                                                                                     | Alpha-Cryptoxanthin                                                                                                                                      | 1,115928285                     | 0,036533338 | 0,149114436       |
| 553,9224193 | HMDB0011104, HMDB11104                                                                                                                                                                                                                                                                                                                                                                                                                                                                                                                                                     | 3-Phosphoadenylylselenate                                                                                                                                | 0,076346601                     | 0,81791266  | 0,913213622       |
| 563,2200969 | HMDB0004051, HMDB04051                                                                                                                                                                                                                                                                                                                                                                                                                                                                                                                                                     | Aerobactin                                                                                                                                               | 0,184187306                     | 0,070787468 | 0,2204524         |
| 563,3697193 | HMDB0115489, HMDB0115615, HMDB0115691, HMDB0115698, HMDB0115704, HMDB0115783, HMDB0115794, HMDB0115800, HMDB0115814                                                                                                                                                                                                                                                                                                                                                                                                                                                        | PA(8:0/18:0)                                                                                                                                             | 0,243504864                     | 0,257090368 | 0,514590464       |
| 567,1137794 | HMDB0033006, HMDB0037087, HMDB33006, HMDB37087                                                                                                                                                                                                                                                                                                                                                                                                                                                                                                                             | Neobignonside                                                                                                                                            | -0,049882764                    | 0,564680147 | 0,762230786       |
| 567,4616888 | HMDB0071165, HMDB0071222, HMDB0071443, HMDB0071663, HMDB0071676, HMDB0071685, HMDB0071738, HMDB0071968, HMDB0072206, HMDB0072245, HMDB0072338, HMDB0072339, HMDB0072338, HMDB0072529, HMDB0072531, HMDB0072546, HMDB0096562, HMDB0096563, HMDB0096564, HMDB0096649, HMDB0096650, HMDB0096651, HMDB0100884, HMDB0100885, HMDB0100886, HMDB71165, HMDB71222, HMDB71443, HMDB71663, HMDB71676, HMDB71685, HMDB71738, HMDB71968, HMDB72206, HMDB72245, HMDB72333, HMDB72338, HMDB72529, HMDB72531, HMDB72546, HMDB96562, HMDB96563, HMDB96564, HMDB96649, HMDB96650, HMDB96651 | TG(10:0/13:0/8:0)                                                                                                                                        | 1,3607016                       | 0,026981582 | 0,122541351       |
| 571,2910387 | HMDB0035987, HMDB35987                                                                                                                                                                                                                                                                                                                                                                                                                                                                                                                                                     | Ganoderic acid H                                                                                                                                         | 0,107929441                     | 0,575789226 | 0,762286527       |
| 573,4520132 | HMDB0007077, HMDB0007329, HMDB0056004, HMDB07077, HMDB07329, HMDB56004                                                                                                                                                                                                                                                                                                                                                                                                                                                                                                     | DG(15:0/18:4(6Z,9Z,12Z                                                                                                                                   | 0,950380863                     | 0,017181613 | 0,090255219       |
| 575,4670917 | HMDB0007075, HMDB0007076, HMDB0007271, HMDB0007300, HMDB0055996, HMDB0056003, HMDB0056142, HMDB07075, HMDB07076, HMDB07271, HMDB07300, HMDB55996, HMDB56003, HMDB56142                                                                                                                                                                                                                                                                                                                                                                                                     | DG(15:0/18:3(6Z,9Z,12Z                                                                                                                                   | 1,019478305                     | 0,003414678 | 0,027317428       |
| 577,3698907 | HMDB0036911, HMDB36911                                                                                                                                                                                                                                                                                                                                                                                                                                                                                                                                                     | Anhydroamarouciacanth B                                                                                                                                  | 0,539951475                     | 0,036294899 | 0,149114436       |
| 579,3030875 | HMDB0030459, HMDB30459                                                                                                                                                                                                                                                                                                                                                                                                                                                                                                                                                     | Hordatine B                                                                                                                                              | 0,282052984                     | 0,203418547 | 0,446844947       |
| 583,2543778 | HMDB0000054, HMDB0000488, HMDB00054, HMDB00488                                                                                                                                                                                                                                                                                                                                                                                                                                                                                                                             | Bilirubin                                                                                                                                                | -0,153721703                    | 0,365269328 | 0,620886655       |
| 584,2035791 | HMDB0014614, HMDB14614                                                                                                                                                                                                                                                                                                                                                                                                                                                                                                                                                     | Montelukast                                                                                                                                              | -0,186130315                    | 0,39506895  | 0,641527233       |
| 587,3387126 | HMDB0036842, HMDB36842                                                                                                                                                                                                                                                                                                                                                                                                                                                                                                                                                     | Hydratopyrroxanthinol                                                                                                                                    | 0,040746307                     | 0,976584506 | 0,990211267       |
| 589,3026258 | HMDB0004158, HMDB0004160, HMDB04158, HMDB04160                                                                                                                                                                                                                                                                                                                                                                                                                                                                                                                             | D-Urobilinogen                                                                                                                                           | 0,432794923                     | 0,432235053 | 0,67185199        |
| 591,1340712 | HMDB0038847, HMDB0041129, HMDB0041719, HMDB0127121, HMDB0127122, HMDB0127170, HMDB0127171, HMDB0127234, HMDB0127235, HMDB0127275, HMDB0127276, HMDB0127295, HMDB0127296, HMDB38847, HMDB41129, HMDB41719                                                                                                                                                                                                                                                                                                                                                                   | Apigenin 7-[rhamnosyl-(1->2)-galacturonide]                                                                                                              | 0,041703787                     | 0,769433652 | 0,883342587       |
| 591,3907568 | HMDB0039054, HMDB39054                                                                                                                                                                                                                                                                                                                                                                                                                                                                                                                                                     | Tuberoside                                                                                                                                               | 0,787369069                     | 0,000392801 | 0,005615123       |

Supplementary Appendix  
MIRA Study

| m/z         | HMDB ID alternatives                                                                                                                                                                                                                                                                                                                                                                                                                                                                                                                                                                                                                                                                                                                                                                                                                                                                                                                                                                                                                                                                                                                                                                                                                                                                                                                                                                                                                                                                                                                                                | Suggested annotation                                                                                                                                                    | Comparison [vegan] - [omnivore] |             |                   |
|-------------|---------------------------------------------------------------------------------------------------------------------------------------------------------------------------------------------------------------------------------------------------------------------------------------------------------------------------------------------------------------------------------------------------------------------------------------------------------------------------------------------------------------------------------------------------------------------------------------------------------------------------------------------------------------------------------------------------------------------------------------------------------------------------------------------------------------------------------------------------------------------------------------------------------------------------------------------------------------------------------------------------------------------------------------------------------------------------------------------------------------------------------------------------------------------------------------------------------------------------------------------------------------------------------------------------------------------------------------------------------------------------------------------------------------------------------------------------------------------------------------------------------------------------------------------------------------------|-------------------------------------------------------------------------------------------------------------------------------------------------------------------------|---------------------------------|-------------|-------------------|
|             |                                                                                                                                                                                                                                                                                                                                                                                                                                                                                                                                                                                                                                                                                                                                                                                                                                                                                                                                                                                                                                                                                                                                                                                                                                                                                                                                                                                                                                                                                                                                                                     |                                                                                                                                                                         | Fold Change (log2)              | p-value     | p-value (BH adj.) |
| 593,1446377 | HMDB0033297, HMDB33297                                                                                                                                                                                                                                                                                                                                                                                                                                                                                                                                                                                                                                                                                                                                                                                                                                                                                                                                                                                                                                                                                                                                                                                                                                                                                                                                                                                                                                                                                                                                              | Kuwanon Z                                                                                                                                                               | 0.121914399                     | 0.556921206 | 0.757470764       |
| 595,493904  | HMDB0031089, HMDB0071223, HMDB0071277, HMDB0071326, HMDB0071400, HMDB0071439, HMDB0071456, HMDB0071508, HMDB0071616, HMDB0071821, HMDB0071842, HMDB0071845, HMDB0071858, HMDB0071864, HMDB0071893, HMDB0071925, HMDB0071928, HMDB0071972, HMDB0072006, HMDB0072048, HMDB0072121, HMDB0072166, HMDB0072345, HMDB0072420, HMDB0072489, HMDB0072569, HMDB0072572, HMDB0072650, HMDB0072686, HMDB0072725, HMDB0072811, HMDB0094827, HMDB0094828, HMDB0094829, HMDB0094830, HMDB0094831, HMDB0094832, HMDB0095052, HMDB0095053, HMDB0095054, HMDB0095055, HMDB0095056, HMDB0095057, HMDB0096565, HMDB0096566, HMDB0096567, HMDB0096568, HMDB0096569, HMDB0096570, HMDB0096652, HMDB0096653, HMDB0096654, HMDB0096739, HMDB0096740, HMDB0096741, HMDB0096742, HMDB0096743, HMDB0096744, HMDB0100887, HMDB0100888, HMDB0100889, HMDB0100974, HMDB0100975, HMDB0100976, HMDB0105194, HMDB0105195, HMDB0105196, HMDB31089, HMDB71223, HMDB71277, HMDB71326, HMDB71400, HMDB71439, HMDB71456, HMDB71508, HMDB71616, HMDB71821, HMDB71842, HMDB71845, HMDB71858, HMDB71864, HMDB71893, HMDB71925, HMDB71928, HMDB71972, HMDB72006, HMDB72048, HMDB72121, HMDB72166, HMDB72345, HMDB72420, HMDB72489, HMDB72569, HMDB72572, HMDB72650, HMDB72686, HMDB72725, HMDB72811, HMDB94827, HMDB94828, HMDB94829, HMDB94830, HMDB94831, HMDB94832, HMDB95052, HMDB95053, HMDB95054, HMDB95055, HMDB95056, HMDB95057, HMDB96565, HMDB96566, HMDB96567, HMDB96568, HMDB96569, HMDB96570, HMDB96652, HMDB96653, HMDB96654, HMDB96739, HMDB96740, HMDB96741, HMDB96742, HMDB96743, HMDB96744 | Glycerol triundecanoate                                                                                                                                                 | 1.269313034                     | 0.013378706 | 0.074083072       |
| 599,4674612 | HMDB0007085, HMDB0007561, HMDB0056006, HMDB07085, HMDB07561, HMDB56006                                                                                                                                                                                                                                                                                                                                                                                                                                                                                                                                                                                                                                                                                                                                                                                                                                                                                                                                                                                                                                                                                                                                                                                                                                                                                                                                                                                                                                                                                              | DG(15:0/20:5(5Z,8Z,11Z                                                                                                                                                  | 0.617252431                     | 0.057197259 | 0.196244799       |
| 607,1068749 | HMDB0037582, HMDB37582                                                                                                                                                                                                                                                                                                                                                                                                                                                                                                                                                                                                                                                                                                                                                                                                                                                                                                                                                                                                                                                                                                                                                                                                                                                                                                                                                                                                                                                                                                                                              | Prunin 6 <sup>'''</sup> -O-gallate                                                                                                                                      | 0.053437754                     | 0.543626924 | 0.754845029       |
| 607,1068749 | HMDB0036336, HMDB36336                                                                                                                                                                                                                                                                                                                                                                                                                                                                                                                                                                                                                                                                                                                                                                                                                                                                                                                                                                                                                                                                                                                                                                                                                                                                                                                                                                                                                                                                                                                                              | Prodelpinidin A1                                                                                                                                                        | 0.053437754                     | 0.543626924 | 0.754845029       |
| 611,1244463 | HMDB0062695, HMDB62695                                                                                                                                                                                                                                                                                                                                                                                                                                                                                                                                                                                                                                                                                                                                                                                                                                                                                                                                                                                                                                                                                                                                                                                                                                                                                                                                                                                                                                                                                                                                              | CMP-N-acetyl-beta-neuraminic(2-)                                                                                                                                        | 0.000237304                     | 0.751758137 | 0.872880287       |
| 611,1244463 | HMDB0132733, HMDB0132734, HMDB0132735, HMDB0132736                                                                                                                                                                                                                                                                                                                                                                                                                                                                                                                                                                                                                                                                                                                                                                                                                                                                                                                                                                                                                                                                                                                                                                                                                                                                                                                                                                                                                                                                                                                  | 6-[4-(3-[3,4-dihydroxy-5-(hydroxymethyl)oxolan-2-yl]oxy-5,7-dihydroxy-4-oxo-3,4-dihydro-2H-1-benzopyran-2-yl)-2-hydroxyphenoxy]-3,4,5-trihydroxyoxane-2-carboxylic acid | 0.000237304                     | 0.751758137 | 0.872880287       |
| 613,1208228 | HMDB0039192, HMDB0039194, HMDB39192, HMDB39194                                                                                                                                                                                                                                                                                                                                                                                                                                                                                                                                                                                                                                                                                                                                                                                                                                                                                                                                                                                                                                                                                                                                                                                                                                                                                                                                                                                                                                                                                                                      | 2-Cinnamoyl-1,6-digalloyl-beta-D-glucopyranose                                                                                                                          | 0.113259275                     | 0.582367069 | 0.762836399       |
| 615,1348441 | HMDB0029903, HMDB29903                                                                                                                                                                                                                                                                                                                                                                                                                                                                                                                                                                                                                                                                                                                                                                                                                                                                                                                                                                                                                                                                                                                                                                                                                                                                                                                                                                                                                                                                                                                                              | 3,5-Dicaffeoyl-4-succinoylquinic acid                                                                                                                                   | 0.198558725                     | 0.398591663 | 0.643651723       |
| 619,1654411 | HMDB0029908, HMDB29908                                                                                                                                                                                                                                                                                                                                                                                                                                                                                                                                                                                                                                                                                                                                                                                                                                                                                                                                                                                                                                                                                                                                                                                                                                                                                                                                                                                                                                                                                                                                              | Camellianin A                                                                                                                                                           | 0.081045515                     | 0.09561594  | 0.271586644       |
| 619,2894036 | HMDB0061690, HMDB0062722, HMDB61690, HMDB62722                                                                                                                                                                                                                                                                                                                                                                                                                                                                                                                                                                                                                                                                                                                                                                                                                                                                                                                                                                                                                                                                                                                                                                                                                                                                                                                                                                                                                                                                                                                      | 1-Arachidonoylglyceroph                                                                                                                                                 | 0.103807635                     | 0.549695925 | 0.756072946       |
| 620,5967051 | HMDB0004952, HMDB0011766, HMDB04952, HMDB11766                                                                                                                                                                                                                                                                                                                                                                                                                                                                                                                                                                                                                                                                                                                                                                                                                                                                                                                                                                                                                                                                                                                                                                                                                                                                                                                                                                                                                                                                                                                      | C22 Cer                                                                                                                                                                 | -0.6103745                      | 0.000103556 | 0.001689068       |
| 621,4351177 | HMDB0039544, HMDB0041429, HMDB39544, HMDB41429                                                                                                                                                                                                                                                                                                                                                                                                                                                                                                                                                                                                                                                                                                                                                                                                                                                                                                                                                                                                                                                                                                                                                                                                                                                                                                                                                                                                                                                                                                                      | (20R)-Ginsenoside Rh2                                                                                                                                                   | 0.837412689                     | 0.010619762 | 0.063085924       |
| 632,1733014 | HMDB0035420, HMDB35420                                                                                                                                                                                                                                                                                                                                                                                                                                                                                                                                                                                                                                                                                                                                                                                                                                                                                                                                                                                                                                                                                                                                                                                                                                                                                                                                                                                                                                                                                                                                              | Pyranocyanin A                                                                                                                                                          | 0.177768498                     | 0.781008461 | 0.889038232       |
| 639,1022505 | HMDB0127345                                                                                                                                                                                                                                                                                                                                                                                                                                                                                                                                                                                                                                                                                                                                                                                                                                                                                                                                                                                                                                                                                                                                                                                                                                                                                                                                                                                                                                                                                                                                                         | 2-[5,7-dihydroxy-2-(4-hydroxyphenyl)-4-oxo-4H-chromen-6-yl]-6-methyl-5-oxo-3-[(3,4,5-trihydroxy-6-methylloxan-2-yl)oxy]loxan-4-yloxidanesulfonic acid                   | 0.063623816                     | 0.364846402 | 0.620886655       |
| 640,2928591 | HMDB0013058, HMDB0013062, HMDB0013063, HMDB0060154, HMDB13058, HMDB13062, HMDB13063, HMDB60154                                                                                                                                                                                                                                                                                                                                                                                                                                                                                                                                                                                                                                                                                                                                                                                                                                                                                                                                                                                                                                                                                                                                                                                                                                                                                                                                                                                                                                                                      | S-(9-deoxy-delta9,12-PGD2)-glutathione                                                                                                                                  | 0.080412753                     | 0.397219117 | 0.642625361       |
| 642,3057335 | HMDB0013056, HMDB0013057, HMDB0013060, HMDB0013061, HMDB0060155, HMDB0062478, HMDB13056, HMDB13057, HMDB13060, HMDB13061, HMDB60155, HMDB62478                                                                                                                                                                                                                                                                                                                                                                                                                                                                                                                                                                                                                                                                                                                                                                                                                                                                                                                                                                                                                                                                                                                                                                                                                                                                                                                                                                                                                      | S-(11-OH-9-deoxy-delta9,12-PGD2)-glutathione                                                                                                                            | 0.081189689                     | 0.190026305 | 0.428172966       |
| 644,2403999 | HMDB0014429, HMDB14429                                                                                                                                                                                                                                                                                                                                                                                                                                                                                                                                                                                                                                                                                                                                                                                                                                                                                                                                                                                                                                                                                                                                                                                                                                                                                                                                                                                                                                                                                                                                              | Acarbose                                                                                                                                                                | 0.100498774                     | 0.363995566 | 0.620886655       |
| 644,5001425 | HMDB0010701, HMDB10701                                                                                                                                                                                                                                                                                                                                                                                                                                                                                                                                                                                                                                                                                                                                                                                                                                                                                                                                                                                                                                                                                                                                                                                                                                                                                                                                                                                                                                                                                                                                              | C18 CerP                                                                                                                                                                | -0.366504481                    | 0.00061494  | 0.007885705       |
| 648,6281538 | HMDB0000831, HMDB0004956, HMDB0011769, HMDB00831, HMDB04956, HMDB11769                                                                                                                                                                                                                                                                                                                                                                                                                                                                                                                                                                                                                                                                                                                                                                                                                                                                                                                                                                                                                                                                                                                                                                                                                                                                                                                                                                                                                                                                                              | C24 Cer                                                                                                                                                                 | -0.505086008                    | 2.60457E-05 | 0.000630884       |
| 649,1971706 | HMDB0034682, HMDB34682                                                                                                                                                                                                                                                                                                                                                                                                                                                                                                                                                                                                                                                                                                                                                                                                                                                                                                                                                                                                                                                                                                                                                                                                                                                                                                                                                                                                                                                                                                                                              | cis-Ferulic acid [arabinosyl-(1->3)-[glucosyl-(1->6)]-glucosyl] ester                                                                                                   | 0.076315612                     | 0.512358178 | 0.730874126       |

Supplementary Appendix  
MIRA Study

| m/z         | HMDB ID alternatives                                                                                                                                                                                                                                                                                                                                                                                                                                                                                                                                                   | Suggested annotation                                                       | Comparison [vegan] - [omnivore] |             |                   |
|-------------|------------------------------------------------------------------------------------------------------------------------------------------------------------------------------------------------------------------------------------------------------------------------------------------------------------------------------------------------------------------------------------------------------------------------------------------------------------------------------------------------------------------------------------------------------------------------|----------------------------------------------------------------------------|---------------------------------|-------------|-------------------|
|             |                                                                                                                                                                                                                                                                                                                                                                                                                                                                                                                                                                        |                                                                            | Fold Change (log2)              | p-value     | p-value (BH adj.) |
| 649,21183   | HMDB0030627, HMDB0034281, HMDB30627, HMDB34281                                                                                                                                                                                                                                                                                                                                                                                                                                                                                                                         | 5-Hydroxy-7,3",4"-trimethoxy-8-methylisoflavone 5-neohesperidoside         | 0,109346091                     | 0,578165149 | 0,762373662       |
| 650,6457845 | HMDB0011768, HMDB11768                                                                                                                                                                                                                                                                                                                                                                                                                                                                                                                                                 | C24DH Cer                                                                  | -0,479256009                    | 3,68435E-06 | 0,000114741       |
| 654,6050673 | HMDB0035469, HMDB35469                                                                                                                                                                                                                                                                                                                                                                                                                                                                                                                                                 | N-(2R-Hydroxydocosanoyl)-2S-amino-1,3S,4R-octadecanetriol                  | -0,510958925                    | 0,000113938 | 0,001806429       |
| 663,3899173 | HMDB0031837, HMDB31837                                                                                                                                                                                                                                                                                                                                                                                                                                                                                                                                                 | 3-O-trans-Feruloylscapic acid                                              | 0,269740945                     | 0,067811904 | 0,214705473       |
| 664,6610724 | HMDB0011770, HMDB11770                                                                                                                                                                                                                                                                                                                                                                                                                                                                                                                                                 | Cer(d18:0/25:0)                                                            | -0,111555471                    | 0,781076747 | 0,889038232       |
| 671,4640511 | HMDB0007860, HMDB0114900, HMDB0114925, HMDB0114949, HMDB0115092, HMDB0115504, HMDB0115532, HMDB07860                                                                                                                                                                                                                                                                                                                                                                                                                                                                   | PA(16:0/18:2(9Z,12Z))                                                      | -0,158500761                    | 0,000715007 | 0,008906941       |
| 673,0922488 | HMDB0060465, HMDB60465                                                                                                                                                                                                                                                                                                                                                                                                                                                                                                                                                 | cyclic GMP-AMP                                                             | 0,029080945                     | 0,245198342 | 0,499562978       |
| 673,4789745 | HMDB0007858, HMDB0007859, HMDB0031130, HMDB0114877, HMDB0114899, HMDB0114924, HMDB0115062, HMDB0115091, HMDB07858, HMDB07859, HMDB31130                                                                                                                                                                                                                                                                                                                                                                                                                                | PA(16:0/18:1(11Z))                                                         | -0,264597594                    | 0,00184486  | 0,018491012       |
| 673,5782828 | HMDB0007204, HMDB0007233, HMDB0007261, HMDB0007289, HMDB0007318, HMDB0007371, HMDB0007372, HMDB0007399, HMDB0007427, HMDB0007455, HMDB0007484, HMDB0007597, HMDB0007598, HMDB0007625, HMDB0007652, HMDB0007653, HMDB0056070, HMDB0056076, HMDB0056098, HMDB0056105, HMDB0056188, HMDB0056207, HMDB0056222, HMDB07204, HMDB07233, HMDB07261, HMDB07289, HMDB07318, HMDB07371, HMDB07372, HMDB07399, HMDB07427, HMDB07455, HMDB07484, HMDB07597, HMDB07598, HMDB07625, HMDB07652, HMDB07653, HMDB56070, HMDB56076, HMDB56098, HMDB56105, HMDB56188, HMDB56207, HMDB56222 | DG(18:1(11Z)/22:2(13Z))                                                    | -0,891403656                    | 3,48767E-09 | 5,06875E-07       |
| 673,5951703 | HMDB0006736, HMDB0010373, HMDB06736, HMDB10373                                                                                                                                                                                                                                                                                                                                                                                                                                                                                                                         | CE(20:3(8Z,11Z,14Z))                                                       | -0,947786384                    | 1,48133E-09 | 2,9748E-07        |
| 675,1099948 | HMDB0001312, HMDB01312                                                                                                                                                                                                                                                                                                                                                                                                                                                                                                                                                 | Diadenosine diphosphate                                                    | 0,042311466                     | 0,880357802 | 0,950089113       |
| 679,2826539 | HMDB0038449, HMDB38449                                                                                                                                                                                                                                                                                                                                                                                                                                                                                                                                                 | Vomifoliol                                                                 | 0,162038381                     | 0,420392715 | 0,660009181       |
| 687,4019902 | HMDB0115038                                                                                                                                                                                                                                                                                                                                                                                                                                                                                                                                                            | 9-[glucosyl-(1->4)-xylosyl-(1->6)-glucoside]                               | 0,037128217                     | 0,001040847 | 0,011787251       |
| 690,5055952 | HMDB0007868, HMDB0007932, HMDB0008826, HMDB0008923, HMDB0008986, HMDB0029174, HMDB0112064, HMDB0113041, HMDB0113841, HMDB0113845, HMDB0113940, HMDB05317, HMDB05325, HMDB07868, HMDB07932, HMDB08826, HMDB08923, HMDB08986, HMDB29174                                                                                                                                                                                                                                                                                                                                  | PC(14:0/15:0)                                                              | -0,083663305                    | 0,298976029 | 0,559457291       |
| 691,432188  | HMDB0031093, HMDB0114792, HMDB0114807, HMDB0114808, HMDB0114863, HMDB0114957, HMDB0114982, HMDB0114983, HMDB0115009, HMDB0115010, HMDB0115035, HMDB0115202, HMDB0115350, HMDB0115376, HMDB0115401, HMDB31093                                                                                                                                                                                                                                                                                                                                                           | 9,12,15-Octadecatrienoic acid 1-[(phosphonoxy)methyl]-1,2-ethanediyl ester | 0,144825121                     | 0,43918136  | 0,677816187       |
| 692,2001742 | HMDB0031996, HMDB31996                                                                                                                                                                                                                                                                                                                                                                                                                                                                                                                                                 | Licorice glycoside E                                                       | 0,081572154                     | 0,629532186 | 0,797895444       |
| 693,1106213 | HMDB0033274, HMDB33274                                                                                                                                                                                                                                                                                                                                                                                                                                                                                                                                                 | Guavin B                                                                   | 0,069046263                     | 0,546112454 | 0,756072946       |
| 695,4651113 | HMDB0031092, HMDB0114790, HMDB0114841, HMDB0114860, HMDB0114880, HMDB0114903, HMDB0114904, HMDB0114928, HMDB0114929, HMDB0114954, HMDB0114979, HMDB0114980, HMDB0115006, HMDB0115007, HMDB0115032, HMDB0115122, HMDB0115147, HMDB0115174, HMDB0115323, HMDB0115513, HMDB0115565, HMDB0116701, HMDB31092                                                                                                                                                                                                                                                                | 1,2-Di-(9Z,12Z-octadecadienoyl)-sn-glycero-3-phosphate                     | 0,025520513                     | 0,107320058 | 0,295428876       |
| 704,5226728 | HMDB0007869, HMDB0007934, HMDB0007965, HMDB0008892, HMDB0008988, HMDB0010567, HMDB0112959, HMDB0113084, HMDB0113865, HMDB0113942, HMDB07869, HMDB07934, HMDB07965, HMDB08892, HMDB08988, HMDB10567                                                                                                                                                                                                                                                                                                                                                                     | PC(14:0/16:0)                                                              | -0,095090384                    | 0,917739393 | 0,96534228        |
| 714,5086806 | HMDB0008835, HMDB0008867, HMDB0008928, HMDB0008959, HMDB0008960, HMDB0009023, HMDB0009056, HMDB0009088, HMDB0009251, HMDB0009283, HMDB0113020, HMDB0113166, HMDB0113847, HMDB0113848, HMDB0113849, HMDB0113879, HMDB0114012, HMDB0114039, HMDB0114065, HMDB05322, HMDB08835, HMDB08867, HMDB08928, HMDB08959, HMDB08960, HMDB09023, HMDB09056, HMDB09088, HMDB09251, HMDB09283                                                                                                                                                                                         | PE(14:0/20:2(11Z,14Z))                                                     | -0,454527607                    | 0,002105242 | 0,019693506       |
| 716,5234136 | HMDB0007936, HMDB0008000, HMDB0008834, HMDB0008866, HMDB0008926, HMDB0008927, HMDB0008958, HMDB0008990, HMDB0009022, HMDB0009055, HMDB0009218, HMDB0009250, HMDB0112953, HMDB0112954, HMDB0113112, HMDB0113139, HMDB0113850, HMDB0113851, HMDB0113852, HMDB0113853, HMDB0113965, HMDB0113986, HMDB0114011, HMDB0114038, HMDB05320, HMDB05344, HMDB07936, HMDB08000, HMDB08834, HMDB08866, HMDB08926, HMDB08927, HMDB08958, HMDB08990, HMDB09022, HMDB09055, HMDB09218, HMDB09250                                                                                       | PC(15:0/16:1(9Z))                                                          | -0,355601565                    | 0,011194729 | 0,06507869        |
| 719,4641199 | HMDB0114849, HMDB0114868, HMDB0114869, HMDB0114911, HMDB0114936, HMDB0114961, HMDB0114962, HMDB0114987, HMDB0115014, HMDB0115127, HMDB0115128, HMDB0115152, HMDB0115179, HMDB0115203, HMDB0115204, HMDB0115353, HMDB0115379, HMDB0115404, HMDB0115523, HMDB0115525, HMDB0115526, HMDB0115542, HMDB0115569, HMDB0115570                                                                                                                                                                                                                                                 | PA(16:0/22:6(4Z,7Z,10Z))                                                   | -0,130510996                    | 0,011169757 | 0,06507869        |
| 719,4882277 | HMDB0010571, HMDB0010585, HMDB10571, HMDB10585                                                                                                                                                                                                                                                                                                                                                                                                                                                                                                                         | PG(16:0/16:1(9Z))                                                          | -0,203882471                    | 0,036140432 | 0,149114436       |
| 720,2516602 | HMDB0032859, HMDB32859                                                                                                                                                                                                                                                                                                                                                                                                                                                                                                                                                 | Aquifoliumine EII                                                          | -0,04259577                     | 0,698072768 | 0,847798683       |

Supplementary Appendix  
MIRA Study

| m/z         | HMDB ID alternatives                                                                                                                                                                                                                                                                                                                                                                                                                                                                                                                                                                                                                                                                                                                                                                                                                            | Suggested annotation                                      | Comparison [vegan] - [omnivore] |             |                   |
|-------------|-------------------------------------------------------------------------------------------------------------------------------------------------------------------------------------------------------------------------------------------------------------------------------------------------------------------------------------------------------------------------------------------------------------------------------------------------------------------------------------------------------------------------------------------------------------------------------------------------------------------------------------------------------------------------------------------------------------------------------------------------------------------------------------------------------------------------------------------------|-----------------------------------------------------------|---------------------------------|-------------|-------------------|
|             |                                                                                                                                                                                                                                                                                                                                                                                                                                                                                                                                                                                                                                                                                                                                                                                                                                                 |                                                           | Fold Change (log2)              | p-value     | p-value (BH adj.) |
| 721,4818174 | HMDB0114847, HMDB0114848, HMDB0114867, HMDB0114886, HMDB0114909, HMDB0114910, HMDB0114934, HMDB0114935, HMDB0114960, HMDB0115040, HMDB0115102, HMDB0115126, HMDB0115150, HMDB0115151, HMDB0115177, HMDB0115178, HMDB0115327, HMDB0115352, HMDB0115378, HMDB0115495, HMDB0115521, HMDB0115522, HMDB0115524, HMDB0115540, HMDB0115541, HMDB0116704                                                                                                                                                                                                                                                                                                                                                                                                                                                                                                | PA(16:0/22:5(4Z,7Z,10Z)                                   | -0.430189127                    | 0,000266174 | 0,003933957       |
| 722,5116733 | HMDB0009149, HMDB0009150, HMDB0009182, HMDB0009183, HMDB0009214, HMDB0009411, HMDB0009444, HMDB0011352, HMDB0011353, HMDB0011379, HMDB0011410, HMDB0011411, HMDB0011443, HMDB0011444, HMDB09149, HMDB09150, HMDB09182, HMDB09183, HMDB09214, HMDB09411, HMDB09444, HMDB11352, HMDB11353, HMDB11379, HMDB11410, HMDB11411, HMDB11443, HMDB11444                                                                                                                                                                                                                                                                                                                                                                                                                                                                                                  | PE(18:3(6Z,9Z,12Z)/P-18:1(11Z))                           | -1,106099228                    | 2,73582E-08 | 2,38564E-06       |
| 723,4241648 | HMDB0039970, HMDB39970                                                                                                                                                                                                                                                                                                                                                                                                                                                                                                                                                                                                                                                                                                                                                                                                                          | Bis(4-methoxybenzoyl)-3a,29-dihydroxy-8-multifloren-7-one | -0,176332333                    | 0,000604151 | 0,007862977       |
| 726,5418527 | HMDB0009050, HMDB0009051, HMDB0009083, HMDB0009084, HMDB0009115, HMDB0009312, HMDB0011349, HMDB0011376, HMDB0011407, HMDB0011408, HMDB0011440, HMDB0011441, HMDB09050, HMDB09051, HMDB09083, HMDB09084, HMDB09115, HMDB09312, HMDB11349, HMDB11376, HMDB11407, HMDB11408, HMDB11440, HMDB11441                                                                                                                                                                                                                                                                                                                                                                                                                                                                                                                                                  | PE(18:1(11Z)/P-18:1(11Z))                                 | -0,76263493                     | 5,47256E-08 | 4,33825E-06       |
| 730,5475699 | HMDB0033621, HMDB33621                                                                                                                                                                                                                                                                                                                                                                                                                                                                                                                                                                                                                                                                                                                                                                                                                          | Araliacerebroside                                         | -0,375012917                    | 0,048055545 | 0,174912962       |
| 731,5582902 | HMDB0114793, HMDB0114843, HMDB0114881, HMDB0115054, HMDB0115067, HMDB0115230, HMDB0115243, HMDB0115428, HMDB0115640, HMDB0115648, HMDB0115656, HMDB0115672, HMDB0115702, HMDB0115721, HMDB0115730, HMDB0115738, HMDB0115747, HMDB0115758, HMDB0115764, HMDB0115798, HMDB0115825, HMDB0115837, HMDB0115854, HMDB0115866, HMDB0115875, HMDB0115883, HMDB0115895, HMDB0115912, HMDB0115923, HMDB0115940                                                                                                                                                                                                                                                                                                                                                                                                                                            | PA(14:0/24:0)                                             | -0,383717019                    | 0,001468628 | 0,0156176         |
| 736,5279201 | HMDB0008258, HMDB0011214, HMDB08258, HMDB11214                                                                                                                                                                                                                                                                                                                                                                                                                                                                                                                                                                                                                                                                                                                                                                                                  | PC(18:4(6Z,9Z,12Z,15Z16:0)                                | -0,635839537                    | 2,22492E-07 | 1,21258E-05       |
| 742,5381866 | HMDB0007940, HMDB0008132, HMDB0008843, HMDB0008875, HMDB0008934, HMDB0008966, HMDB0008994, HMDB0009025, HMDB0009026, HMDB0009058, HMDB0009059, HMDB0009090, HMDB0009254, HMDB0009286, HMDB0009515, HMDB0009547, HMDB0113025, HMDB0113339, HMDB0113856, HMDB0113857, HMDB0113858, HMDB0113884, HMDB0113943, HMDB0114015, HMDB0114042, HMDB0114068, HMDB0114211, HMDB0114239, HMDB05332, HMDB05343, HMDB05347, HMDB07940, HMDB08132, HMDB08843, HMDB08875, HMDB08934, HMDB08966, HMDB08994, HMDB09025, HMDB09026, HMDB09058, HMDB09059, HMDB09090, HMDB09254, HMDB09286, HMDB09515, HMDB09547                                                                                                                                                                                                                                                     | PC(15:0/18:2(9Z,12Z))                                     | -0,205400586                    | 0,023621217 | 0,112555746       |
| 746,5109073 | HMDB0005780, HMDB0009479, HMDB0009480, HMDB0009708, HMDB0011420, HMDB0011453, HMDB05780, HMDB09479, HMDB09480, HMDB09708, HMDB11361, HMDB11420, HMDB11453                                                                                                                                                                                                                                                                                                                                                                                                                                                                                                                                                                                                                                                                                       | PE(O-16:1(1Z)/22:6(4Z,7Z,10Z)                             | -0,999468033                    | 1,55453E-06 | 6,06903E-05       |
| 752,4525639 | HMDB0012350, HMDB0012430, HMDB0112299, HMDB0112312, HMDB0112359, HMDB0112489, HMDB0112655, HMDB0112679, HMDB12350, HMDB12430                                                                                                                                                                                                                                                                                                                                                                                                                                                                                                                                                                                                                                                                                                                    | PS(14:1(9Z)/20:4(5Z,8Z)                                   | -0,316476544                    | 0,000580107 | 0,007782359       |
| 754,4651928 | HMDB0012339, HMDB0012349, HMDB0012370, HMDB0012410, HMDB0012419, HMDB0012429, HMDB0112298, HMDB0112311, HMDB0112344, HMDB0112358, HMDB0112447, HMDB0112488, HMDB0112594, HMDB0112654, HMDB12339, HMDB12349, HMDB12370, HMDB12410, HMDB12419, HMDB12429                                                                                                                                                                                                                                                                                                                                                                                                                                                                                                                                                                                          | PS(14:0/20:4(5Z,8Z,11Z)                                   | -0,051622128                    | 0,181767944 | 0,417740595       |
| 756,5539501 | HMDB0007880, HMDB0007912, HMDB0007973, HMDB0008004, HMDB0008005, HMDB0008068, HMDB0008101, HMDB0008133, HMDB0008296, HMDB0008328, HMDB0008909, HMDB0009549, HMDB0010565, HMDB0112966, HMDB0112967, HMDB0112968, HMDB0112969, HMDB0112992, HMDB0113010, HMDB0113047, HMDB0113089, HMDB0113169, HMDB0113312, HMDB0113340, HMDB0113536, HMDB0113563, HMDB0113925, HMDB0114241, HMDB07880, HMDB07912, HMDB07973, HMDB08004, HMDB08005, HMDB08068, HMDB08101, HMDB08133, HMDB08296, HMDB08328, HMDB08909, HMDB09549, HMDB10565                                                                                                                                                                                                                                                                                                                       | PC(14:0/20:2(11Z,14Z))                                    | -0,268983483                    | 7,52559E-05 | 0,001396237       |
| 762,5065213 | HMDB0008946, HMDB0008977, HMDB0008978, HMDB0009038, HMDB0009071, HMDB0009102, HMDB0009103, HMDB0009133, HMDB0009134, HMDB0009166, HMDB0009167, HMDB0009198, HMDB0009294, HMDB0009325, HMDB0009326, HMDB0009358, HMDB0009359, HMDB0009390, HMDB0009423, HMDB0009454, HMDB0009455, HMDB0009617, HMDB0009650, HMDB0009682, HMDB0113036, HMDB0113675, HMDB0113896, HMDB0113913, HMDB0113914, HMDB0113975, HMDB0114076, HMDB0114103, HMDB0114104, HMDB0114132, HMDB0114133, HMDB0114160, HMDB0114385, HMDB0114524, HMDB0114550, HMDB0114576, HMDB05334, HMDB08946, HMDB08977, HMDB08978, HMDB09038, HMDB09071, HMDB09102, HMDB09103, HMDB09133, HMDB09134, HMDB09166, HMDB09167, HMDB09198, HMDB09294, HMDB09325, HMDB09326, HMDB09358, HMDB09326, HMDB09358, HMDB09359, HMDB09390, HMDB09423, HMDB09454, HMDB09455, HMDB09617, HMDB09650, HMDB09682 | PE(16:0/22:6(4Z,7Z,10Z)                                   | -0,670417194                    | 9,63069E-05 | 0,001646659       |
| 763,7183397 | HMDB0007615, HMDB0007811, HMDB0042090, HMDB0042931, HMDB0056088, HMDB0094403, HMDB0094404, HMDB0094405, HMDB0094406, HMDB0094407, HMDB0094408, HMDB0094514, HMDB0094515, HMDB0094516, HMDB0094517, HMDB0094574, HMDB0094575, HMDB0094576, HMDB0094577, HMDB0094628, HMDB0094629, HMDB0094630, HMDB0094631, HMDB0094632, HMDB0094633, HMDB07615, HMDB07811, HMDB42090, HMDB42931, HMDB56088, HMDB94403, HMDB94404, HMDB94405, HMDB94406, HMDB94407, HMDB94408, HMDB94514, HMDB94515, HMDB94516, HMDB94517, HMDB94574, HMDB94575, HMDB94576, HMDB94577, HMDB94628, HMDB94629, HMDB94630, HMDB94631, HMDB94632, HMDB94633                                                                                                                                                                                                                          | DG(22:0/24:0/0:0)                                         | -0,08943238                     | 0,124521031 | 0,32804332        |

Supplementary Appendix  
MIRA Study

| m/z         | HMDB ID alternatives                                                                                                                                                                                                                                                                                                                                                                                                                                                                                                                                                                                                                                                                                                                                                                                                                                                                                                                                                                       | Suggested annotation                                     | Comparison [vegan] - [omnivore] |             |                   |
|-------------|--------------------------------------------------------------------------------------------------------------------------------------------------------------------------------------------------------------------------------------------------------------------------------------------------------------------------------------------------------------------------------------------------------------------------------------------------------------------------------------------------------------------------------------------------------------------------------------------------------------------------------------------------------------------------------------------------------------------------------------------------------------------------------------------------------------------------------------------------------------------------------------------------------------------------------------------------------------------------------------------|----------------------------------------------------------|---------------------------------|-------------|-------------------|
|             |                                                                                                                                                                                                                                                                                                                                                                                                                                                                                                                                                                                                                                                                                                                                                                                                                                                                                                                                                                                            |                                                          | Fold Change (log2)              | p-value     | p-value (BH adj.) |
| 766,5369853 | HMDB000799, HMDB000795, HMDB0008428, HMDB0008461, HMDB0008943, HMDB0008969, HMDB0009003, HMDB0009004, HMDB0009034, HMDB0009035, HMDB0009067, HMDB0009068, HMDB0009099, HMDB0009131, HMDB0009164, HMDB0009196, HMDB0009228, HMDB0009259, HMDB0009260, HMDB0009291, HMDB0009322, HMDB0009323, HMDB0009355, HMDB0009356, HMDB0009387, HMDB0009420, HMDB0009583, HMDB0113034, HMDB0113594, HMDB0113893, HMDB0113951, HMDB0113971, HMDB0113972, HMDB0113993, HMDB0114018, HMDB0114019, HMDB0114045, HMDB0114046, HMDB0114073, HMDB0114100, HMDB0114101, HMDB0114129, HMDB0114130, HMDB0114157, HMDB0114272, HMDB0114300, HMDB0114327, HMDB0114355, HMDB0114495, HMDB0116711, HMDB05333, HMDB07949, HMDB07950, HMDB08428, HMDB08461, HMDB08943, HMDB08969, HMDB09003, HMDB09004, HMDB09034, HMDB09035, HMDB09067, HMDB09068, HMDB09099, HMDB09131, HMDB09164, HMDB09196, HMDB09228, HMDB09259, HMDB09260, HMDB09291, HMDB09322, HMDB09323, HMDB09355, HMDB09356, HMDB09387, HMDB09420, HMDB09583 | PC(15:0/20:4(5Z,8Z,11Z)                                  | -0,228547968                    | 0,014930805 | 0,080368283       |
| 767,5589472 | HMDB0115591                                                                                                                                                                                                                                                                                                                                                                                                                                                                                                                                                                                                                                                                                                                                                                                                                                                                                                                                                                                | PA(22:1(13Z)/19:2(10Z,                                   | -0,385534131                    | 0,000891811 | 0,010593775       |
| 772,529517  | HMDB0009710, HMDB0009711, HMDB0011427, HMDB0011460, HMDB09710, HMDB09711, HMDB11427, HMDB11460                                                                                                                                                                                                                                                                                                                                                                                                                                                                                                                                                                                                                                                                                                                                                                                                                                                                                             | PE(22:6(4Z,7Z,10Z,13Z,18:1(11Z))                         | -0,50872065                     | 8,12111E-05 | 0,001416321       |
| 774,5418828 | HMDB0009644, HMDB0009645, HMDB0009677, HMDB0009678, HMDB0009709, HMDB0011394, HMDB0011425, HMDB0011426, HMDB0011458, HMDB0011459, HMDB09644, HMDB09645, HMDB09677, HMDB09678, HMDB09709, HMDB11394, HMDB11425, HMDB11426, HMDB11458, HMDB11459                                                                                                                                                                                                                                                                                                                                                                                                                                                                                                                                                                                                                                                                                                                                             | PE(22:5(4Z,7Z,10Z,13Z,18:1(11Z))                         | -1,02157926                     | 5,12862E-09 | 6,38879E-07       |
| 774,5418828 | HMDB0009314, HMDB0009315, HMDB0009346, HMDB0009379, HMDB0011383, HMDB0011384, HMDB0011415, HMDB0011448, HMDB09314, HMDB09315, HMDB09346, HMDB09379, HMDB11383, HMDB11384, HMDB11415, HMDB11448                                                                                                                                                                                                                                                                                                                                                                                                                                                                                                                                                                                                                                                                                                                                                                                             | PE(20:2(11Z,14Z)/P-18:1(11Z))                            | -1,02157926                     | 5,12862E-09 | 6,38879E-07       |
| 776,5584948 | HMDB0009611, HMDB0009612, HMDB0009643, HMDB0009676, HMDB0011392, HMDB0011393, HMDB0011424, HMDB0011457, HMDB09611, HMDB09612, HMDB09643, HMDB09676, HMDB11392, HMDB11393, HMDB11424, HMDB11457                                                                                                                                                                                                                                                                                                                                                                                                                                                                                                                                                                                                                                                                                                                                                                                             | PE(22:4(7Z,10Z,13Z,16:18:1(11Z))                         | -0,319783008                    | 0,000498741 | 0,006903214       |
| 777,4072859 | HMDB0039591, HMDB39591                                                                                                                                                                                                                                                                                                                                                                                                                                                                                                                                                                                                                                                                                                                                                                                                                                                                                                                                                                     | Periandrin V                                             | -0,107888635                    | 0,001728617 | 0,017733576       |
| 780,4813522 | HMDB0012372, HMDB0012403, HMDB0012413, HMDB0012432, HMDB0061503, HMDB0061506, HMDB0061519, HMDB0061546, HMDB0112304, HMDB0112305, HMDB0112316, HMDB0112348, HMDB0112362, HMDB0112427, HMDB0112451, HMDB0112491, HMDB0112492, HMDB0112658, HMDB0112682, HMDB0112789, HMDB0112815, HMDB0112839, HMDB0113816, HMDB0116751, HMDB0116752, HMDB12372, HMDB12403, HMDB12413, HMDB12432, HMDB61503, HMDB61506, HMDB61519, HMDB61546                                                                                                                                                                                                                                                                                                                                                                                                                                                                                                                                                                | PS(16:1(9Z)/20:4(5Z,8Z)                                  | -0,341513821                    | 3,99607E-05 | 0,00082966        |
| 781,5732329 | HMDB0114972, HMDB0114998, HMDB0115025, HMDB0115111, HMDB0115136, HMDB0115255, HMDB0115309, HMDB0115437, HMDB0115438, HMDB0115463, HMDB0115552, HMDB0115578, HMDB0115590, HMDB0115592                                                                                                                                                                                                                                                                                                                                                                                                                                                                                                                                                                                                                                                                                                                                                                                                       | PA(18:2(9Z,12Z)/24:1(1:                                  | -0,338173464                    | 2,89995E-05 | 0,000665462       |
| 782,4963086 | HMDB0012361, HMDB0012371, HMDB0012392, HMDB0012402, HMDB0012412, HMDB0012421, HMDB0012431, HMDB0112303, HMDB0112361, HMDB0112374, HMDB0112390, HMDB0112391, HMDB0112410, HMDB0112449, HMDB0112450, HMDB0112468, HMDB0112490, HMDB0112597, HMDB0112657, HMDB0112788, HMDB0116750, HMDB12361, HMDB12371, HMDB12392, HMDB12402, HMDB12412, HMDB12421, HMDB12431                                                                                                                                                                                                                                                                                                                                                                                                                                                                                                                                                                                                                               | PS(16:0/20:4(5Z,8Z,11Z)                                  | -0,316341345                    | 7,85033E-05 | 0,001416321       |
| 784,5856493 | HMDB0000593, HMDB0007888, HMDB0007920, HMDB0007979, HMDB0008011, HMDB0008039, HMDB0008070, HMDB0008071, HMDB0008103, HMDB0008135, HMDB0008299, HMDB0008331, HMDB0008559, HMDB0008590, HMDB0009593, HMDB0062690, HMDB0112977, HMDB0113054, HMDB0113076, HMDB0113095, HMDB0113121, HMDB0113148, HMDB0113176, HMDB0113287, HMDB0113314, HMDB0113315, HMDB0113342, HMDB0113539, HMDB0113566, HMDB0113729, HMDB0113933, HMDB0114468, HMDB07888, HMDB07920, HMDB07979, HMDB08011, HMDB08039, HMDB08070, HMDB08071, HMDB08103, HMDB08104, HMDB08135, HMDB08299, HMDB08331, HMDB08559, HMDB08590, HMDB62690                                                                                                                                                                                                                                                                                                                                                                                        | PC(18:1(9Z)/18:1(9Z))                                    | -0,201296174                    | 3,89621E-05 | 0,00082966        |
| 787,6223269 | HMDB0114894, HMDB0115082, HMDB0115234, HMDB0115253, HMDB0115433, HMDB0115644, HMDB0115649, HMDB0115660, HMDB0115676, HMDB0115725, HMDB0115731, HMDB0115742, HMDB0115751, HMDB0115760, HMDB0115768, HMDB0115841, HMDB0115858, HMDB0115870, HMDB0115876, HMDB0115887, HMDB0115899, HMDB0115916, HMDB0115927, HMDB0115944                                                                                                                                                                                                                                                                                                                                                                                                                                                                                                                                                                                                                                                                     | PA(18:0/24:0)                                            | -0,152655367                    | 5,52577E-06 | 0,000160616       |
| 800,678473  | HMDB0011695, HMDB11695                                                                                                                                                                                                                                                                                                                                                                                                                                                                                                                                                                                                                                                                                                                                                                                                                                                                                                                                                                     | SM(d17:1/24:0)                                           | -0,101201336                    | 0,007148601 | 0,047584578       |
| 803,7653822 | HMDB0036744, HMDB36744                                                                                                                                                                                                                                                                                                                                                                                                                                                                                                                                                                                                                                                                                                                                                                                                                                                                                                                                                                     | alpha-Amyrin cerotate                                    | -0,04256969                     | 0,002040038 | 0,019693506       |
| 805,4873937 | HMDB0009780, HMDB0009798, HMDB09780, HMDB09798, HMDB09802                                                                                                                                                                                                                                                                                                                                                                                                                                                                                                                                                                                                                                                                                                                                                                                                                                                                                                                                  | PI(16:0/16:2(9Z,12Z))                                    | -0,200323771                    | 0,000134495 | 0,002094283       |
| 807,5019    | HMDB0009779, HMDB0009797, HMDB09779, HMDB09797                                                                                                                                                                                                                                                                                                                                                                                                                                                                                                                                                                                                                                                                                                                                                                                                                                                                                                                                             | PI(16:0/16:1(9Z))                                        | -0,560795854                    | 9,58522E-06 | 0,000245833       |
| 809,467985  | HMDB0038350, HMDB38350                                                                                                                                                                                                                                                                                                                                                                                                                                                                                                                                                                                                                                                                                                                                                                                                                                                                                                                                                                     | Goyaglycoside g                                          | -0,348809899                    | 2,0602E-07  | 1,19766E-05       |
| 809,6055961 | HMDB0115142, HMDB0115289, HMDB0115315, HMDB0115442, HMDB0115559, HMDB0115585, HMDB0115603, HMDB0115604                                                                                                                                                                                                                                                                                                                                                                                                                                                                                                                                                                                                                                                                                                                                                                                                                                                                                     | PA(20:3(5Z,8Z,11Z)/24:1                                  | -0,475852283                    | 2,20979E-08 | 2,14104E-06       |
| 810,6828145 | HMDB0000140, HMDB0004978, HMDB000140, HMDB04978                                                                                                                                                                                                                                                                                                                                                                                                                                                                                                                                                                                                                                                                                                                                                                                                                                                                                                                                            | Glucosylceramide                                         | -0,222247839                    | 0,002110705 | 0,019693506       |
| 811,6464374 | HMDB0032811, HMDB0116409, HMDB32811                                                                                                                                                                                                                                                                                                                                                                                                                                                                                                                                                                                                                                                                                                                                                                                                                                                                                                                                                        | Isofucosterol 3-O-[6-O-Hexadecanoyl-b-D-glucopyranoside] | -0,48022359                     | 4,78939E-10 | 2,08818E-07       |
| 819,7835224 | HMDB0042180, HMDB0042934, HMDB0043912, HMDB0044641, HMDB0044694, HMDB0094640, HMDB0094641, HMDB42180, HMDB42934, HMDB43912, HMDB44641, HMDB44694, HMDB94640, HMDB94641                                                                                                                                                                                                                                                                                                                                                                                                                                                                                                                                                                                                                                                                                                                                                                                                                     | TG(14:0/18:0/18:0)                                       | -0,098442881                    | 0,00315309  | 0,026185666       |
| 825,466441  | HMDB0013477, HMDB0013490, HMDB0013491, HMDB0013518, HMDB0013533, HMDB0013547, HMDB13477, HMDB13490, HMDB13491, HMDB13518, HMDB13533, HMDB13547                                                                                                                                                                                                                                                                                                                                                                                                                                                                                                                                                                                                                                                                                                                                                                                                                                             | PGP(16:0/18:2(9Z,12Z))                                   | -0,175792041                    | 0,00320233  | 0,026343694       |
| 826,4593149 | HMDB0015418, HMDB15418                                                                                                                                                                                                                                                                                                                                                                                                                                                                                                                                                                                                                                                                                                                                                                                                                                                                                                                                                                     | Josamycin                                                | -0,111001637                    | 0,053899962 | 0,190286507       |
| 833,7557909 | HMDB0031940, HMDB31940                                                                                                                                                                                                                                                                                                                                                                                                                                                                                                                                                                                                                                                                                                                                                                                                                                                                                                                                                                     | Arachisprenol 12                                         | -0,090450287                    | 0,001012007 | 0,011611452       |

Supplementary Appendix  
MIRA Study

| m/z         | HMDB ID alternatives                                                                                                                                                                                                                                                                                                                                                                                                                                                                                                                                                                                                                                                                                                                                                                                                   | Suggested annotation                                                                                                                                                                                                      | Comparison [vegan] - [omnivore] |             |                   |
|-------------|------------------------------------------------------------------------------------------------------------------------------------------------------------------------------------------------------------------------------------------------------------------------------------------------------------------------------------------------------------------------------------------------------------------------------------------------------------------------------------------------------------------------------------------------------------------------------------------------------------------------------------------------------------------------------------------------------------------------------------------------------------------------------------------------------------------------|---------------------------------------------------------------------------------------------------------------------------------------------------------------------------------------------------------------------------|---------------------------------|-------------|-------------------|
|             |                                                                                                                                                                                                                                                                                                                                                                                                                                                                                                                                                                                                                                                                                                                                                                                                                        |                                                                                                                                                                                                                           | Fold Change (log2)              | p-value     | p-value (BH adj.) |
| 839,6775449 | HMDB0032812, HMDB0034089, HMDB32812, HMDB34089                                                                                                                                                                                                                                                                                                                                                                                                                                                                                                                                                                                                                                                                                                                                                                         | Isofucosterol 3-O-[6-O-Octadecanoyl-b-D-glucopyranoside]                                                                                                                                                                  | -0,404563458                    | 6,35559E-06 | 0,00017319        |
| 842,2111694 | HMDB0125095                                                                                                                                                                                                                                                                                                                                                                                                                                                                                                                                                                                                                                                                                                                                                                                                            | 5-[(6-[(2-carboxyacetyl)oxy]methyl)-3,4,5-trihydroxyoxan-2-yl]oxy]-3-[4,5-dihydroxy-6-(hydroxymethyl)-3-[3,4,5-trihydroxy-6-(hydroxymethyl)oxan-2-yl]oxyoxan-2-yl]oxy-7-hydroxy-2-(4-hydroxyphenyl)-1??-chromen-1-ylilium | 0,005897955                     | 0,249542997 | 0,503707162       |
| 850,1278871 | HMDB0001484, HMDB01484, HMDB11665                                                                                                                                                                                                                                                                                                                                                                                                                                                                                                                                                                                                                                                                                                                                                                                      | Acetoacetyl-CoA                                                                                                                                                                                                           | 0,040131104                     | 0,448840341 | 0,683051968       |
| 850,4864794 | HMDB0061557, HMDB0061560, HMDB0061585, HMDB0061609, HMDB0061624, HMDB0061628, HMDB01557, HMDB01560, HMDB01585, HMDB01593, HMDB01596, HMDB01597, HMDB01601, HMDB01609, HMDB01624, HMDB01628                                                                                                                                                                                                                                                                                                                                                                                                                                                                                                                                                                                                                             | PS(DiMe(11,3)/MonoMe)                                                                                                                                                                                                     | -0,162775997                    | 0,132666229 | 0,345328215       |
| 856,680629  | HMDB0009245, HMDB0009277, HMDB0009502, HMDB0009534, HMDB0009725, HMDB0009757, HMDB0114010, HMDB0114036, HMDB0114063, HMDB0114202, HMDB0114230, HMDB0114423, HMDB0114449, HMDB0114610, HMDB0114611, HMDB0114636, HMDB09245, HMDB09277, HMDB09502, HMDB09534, HMDB09725, HMDB09757                                                                                                                                                                                                                                                                                                                                                                                                                                                                                                                                       | PE(20:0/24:1(15Z))                                                                                                                                                                                                        | -0,066762016                    | 0,00262028  | 0,02284884        |
| 858,52977   | HMDB0112617, HMDB0112618, HMDB0112633, HMDB0112649, HMDB0112674, HMDB0112805, HMDB0112806, HMDB0112829, HMDB0112853, HMDB0112870, HMDB0116765, HMDB0116769, HMDB0116784, HMDB0116789                                                                                                                                                                                                                                                                                                                                                                                                                                                                                                                                                                                                                                   | PS(20:3(5Z,8Z,11Z)/22:2)                                                                                                                                                                                                  | -0,227162715                    | 0,008211368 | 0,052677272       |
| 867,4716155 | HMDB0062485, HMDB062485                                                                                                                                                                                                                                                                                                                                                                                                                                                                                                                                                                                                                                                                                                                                                                                                | Lc3Cer                                                                                                                                                                                                                    | -0,248871216                    | 0,000746773 | 0,009171629       |
| 867,7432441 | HMDB0043038, HMDB0043065, HMDB0043071, HMDB0043099, HMDB0043232, HMDB0043238, HMDB0043261, HMDB0043267, HMDB0043294, HMDB0043301, HMDB0043316, HMDB0043317, HMDB0043411, HMDB0043434, HMDB0043467, HMDB0043490, HMDB0043491, HMDB0043513, HMDB0043570, HMDB0043637, HMDB0043659, HMDB0043687, HMDB0043876, HMDB0044711, HMDB0044717, HMDB0045523, HMDB0049096, HMDB0049102, HMDB0049723, HMDB0049729, HMDB0050324, HMDB0050331, HMDB0052413, HMDB43038, HMDB43065, HMDB43071, HMDB43099, HMDB43232, HMDB43238, HMDB43261, HMDB43267, HMDB43294, HMDB43301, HMDB43316, HMDB43317, HMDB43411, HMDB43434, HMDB43467, HMDB43490, HMDB43491, HMDB43513, HMDB43570, HMDB43637, HMDB43659, HMDB43687, HMDB43876, HMDB44711, HMDB44717, HMDB45523, HMDB49096, HMDB49102, HMDB49723, HMDB49729, HMDB50324, HMDB50331, HMDB52413 | TG(15:0/16:0/22:4(7Z,10Z))                                                                                                                                                                                                | -0,204692558                    | 0,000104598 | 0,001689068       |
| 870,6972781 | HMDB0008059, HMDB0008091, HMDB0008124, HMDB0008283, HMDB0008315, HMDB0008538, HMDB0008569, HMDB0008761, HMDB0008762, HMDB0008793, HMDB0113307, HMDB0113335, HMDB0113529, HMDB0113555, HMDB0113714, HMDB0113740, HMDB08059, HMDB08091, HMDB08124, HMDB08283, HMDB08315, HMDB08538, HMDB08569, HMDB08761, HMDB08762, HMDB08793                                                                                                                                                                                                                                                                                                                                                                                                                                                                                           | PC(18:0/24:1(15Z))                                                                                                                                                                                                        | -0,053107133                    | 0,071424315 | 0,221644138       |
| 874,6559343 | HMDB0112384, HMDB0112531, HMDB0112719, HMDB0112886                                                                                                                                                                                                                                                                                                                                                                                                                                                                                                                                                                                                                                                                                                                                                                     | PS(18:0/24:0)                                                                                                                                                                                                             | -0,084968714                    | 0,200596831 | 0,445090169       |
| 878,517482  | HMDB0061558, HMDB0061566, HMDB0061569, HMDB0061586, HMDB0061594, HMDB0061598, HMDB0061606, HMDB0061610, HMDB0061618, HMDB0061625, HMDB01558, HMDB01566, HMDB01569, HMDB01586, HMDB01594, HMDB01598, HMDB01606, HMDB01610, HMDB01618, HMDB01618, HMDB01625                                                                                                                                                                                                                                                                                                                                                                                                                                                                                                                                                              | PS(DiMe(11,3)/MonoMe)                                                                                                                                                                                                     | -0,068574356                    | 0,330784125 | 0,594134913       |
| 882,4287174 | HMDB0116070, HMDB0116086, HMDB0116153, HMDB0116160, HMDB0116177, HMDB0116188, HMDB0116194, HMDB0116211                                                                                                                                                                                                                                                                                                                                                                                                                                                                                                                                                                                                                                                                                                                 | CDP-DG(a-13:0/i-14:0)                                                                                                                                                                                                     | -0,075336076                    | 0,334541562 | 0,594134913       |
| 896,6390584 | HMDB0112592, HMDB0112619, HMDB0112634, HMDB0112756, HMDB0112780, HMDB0112896, HMDB0112897, HMDB0112923                                                                                                                                                                                                                                                                                                                                                                                                                                                                                                                                                                                                                                                                                                                 | PS(20:2(11Z,14Z)/24:1(11Z))                                                                                                                                                                                               | -0,032237127                    | 0,225440185 | 0,473219052       |
| 906,5484507 | HMDB0061559, HMDB0061567, HMDB0061575, HMDB0061578, HMDB0061595, HMDB0061599, HMDB0061607, HMDB0061615, HMDB0061619, HMDB0061626, HMDB01559, HMDB01567, HMDB01575, HMDB01578, HMDB01595, HMDB01599, HMDB01607, HMDB01615, HMDB01619, HMDB01626                                                                                                                                                                                                                                                                                                                                                                                                                                                                                                                                                                         | PS(DiMe(11,3)/MonoMe)                                                                                                                                                                                                     | -0,022252855                    | 0,569936857 | 0,762286527       |
| 908,7092395 | HMDB0114494, HMDB0114653                                                                                                                                                                                                                                                                                                                                                                                                                                                                                                                                                                                                                                                                                                                                                                                               | PE-NMe2(22:2(13Z,16Z)/24:2)                                                                                                                                                                                               | -0,034443632                    | 0,024355889 | 0,114801811       |
| 909,4494612 | HMDB0034817, HMDB34817                                                                                                                                                                                                                                                                                                                                                                                                                                                                                                                                                                                                                                                                                                                                                                                                 | Betavulgaroside X                                                                                                                                                                                                         | -0,130511936                    | 0,138745521 | 0,357947026       |
| 909,5497733 | HMDB0009821, HMDB0009861, HMDB0009865, HMDB0009884, HMDB0009885, HMDB0009891, HMDB0009892, HMDB0009910, HMDB0009911, HMDB0009920, HMDB09821, HMDB09861, HMDB09865, HMDB09884, HMDB09885, HMDB09891, HMDB09892, HMDB09910, HMDB09911, HMDB09920                                                                                                                                                                                                                                                                                                                                                                                                                                                                                                                                                                         | PI(18:0/22:6(4Z,7Z,10Z))                                                                                                                                                                                                  | -0,428933229                    | 0,000260914 | 0,003922713       |
| 913,7647031 | HMDB0053250, HMDB0053263, HMDB0054308, HMDB0054338, HMDB0055108, HMDB0055143, HMDB0055350, HMDB0055356, HMDB0055494, HMDB0055524, HMDB0055534, HMDB0055670, HMDB0055682, HMDB0055764, HMDB0055788, HMDB0055878, HMDB0055926, HMDB0055940, HMDB53250, HMDB53263, HMDB54308, HMDB54338, HMDB55108, HMDB55143, HMDB55350, HMDB55356, HMDB55494, HMDB55524, HMDB55534, HMDB55670, HMDB55682, HMDB55764, HMDB55788, HMDB55878, HMDB55926, HMDB55940                                                                                                                                                                                                                                                                                                                                                                         | TG(18:3(6Z,9Z,12Z)/22:18:0)                                                                                                                                                                                               | -0,029757265                    | 0,662659823 | 0,821962114       |
| 915,4601295 | HMDB0031139, HMDB0033353, HMDB0039007, HMDB31139, HMDB33353, HMDB39007                                                                                                                                                                                                                                                                                                                                                                                                                                                                                                                                                                                                                                                                                                                                                 | Chinenoside V                                                                                                                                                                                                             | -0,098427449                    | 0,207848665 | 0,453738986       |

Supplementary Appendix  
MIRA Study

| m/z         | HMDB ID alternatives                                                                                                                                                                                                                                                                                                                                                                                                                                                                                                                                                                                                                                                                                                                                                                                                                                                                                                                                                                                                                                                                                                                                                                                                                                                                                                                                                                                                                                                                                                                                                                                                                                                                                                                                                                                                                                                                                    | Suggested annotation        | Comparison [vegan] - [omnivore] |             |                   |
|-------------|---------------------------------------------------------------------------------------------------------------------------------------------------------------------------------------------------------------------------------------------------------------------------------------------------------------------------------------------------------------------------------------------------------------------------------------------------------------------------------------------------------------------------------------------------------------------------------------------------------------------------------------------------------------------------------------------------------------------------------------------------------------------------------------------------------------------------------------------------------------------------------------------------------------------------------------------------------------------------------------------------------------------------------------------------------------------------------------------------------------------------------------------------------------------------------------------------------------------------------------------------------------------------------------------------------------------------------------------------------------------------------------------------------------------------------------------------------------------------------------------------------------------------------------------------------------------------------------------------------------------------------------------------------------------------------------------------------------------------------------------------------------------------------------------------------------------------------------------------------------------------------------------------------|-----------------------------|---------------------------------|-------------|-------------------|
|             |                                                                                                                                                                                                                                                                                                                                                                                                                                                                                                                                                                                                                                                                                                                                                                                                                                                                                                                                                                                                                                                                                                                                                                                                                                                                                                                                                                                                                                                                                                                                                                                                                                                                                                                                                                                                                                                                                                         |                             | Fold Change (log2)              | p-value     | p-value (BH adj.) |
| 925,8247105 | HMDB0043116, HMDB0043122, HMDB0043149, HMDB0043156, HMDB0043298, HMDB0043312, HMDB0043353, HMDB0043380, HMDB0043408, HMDB0043429, HMDB0043465, HMDB0043486, HMDB0043550, HMDB0043632, HMDB0046288, HMDB0046294, HMDB0047039, HMDB0047046, HMDB0050328, HMDB0051429, HMDB0051934, HMDB43116, HMDB43122, HMDB43149, HMDB43156, HMDB43298, HMDB43312, HMDB43353, HMDB43380, HMDB43408, HMDB43429, HMDB43465, HMDB43486, HMDB43550, HMDB43632, HMDB46288, HMDB46294, HMDB47039, HMDB47046, HMDB50328, HMDB51429, HMDB51934                                                                                                                                                                                                                                                                                                                                                                                                                                                                                                                                                                                                                                                                                                                                                                                                                                                                                                                                                                                                                                                                                                                                                                                                                                                                                                                                                                                  | TG(15:0/22:0/20:3(5Z,8:     | -0.082513179                    | 0,020518914 | 0,101087532       |
| 931,9081625 | HMDB0044024, HMDB0044645, HMDB0044829, HMDB0045453, HMDB0045606, HMDB0046231, HMDB0046355, HMDB0047076, HMDB44024, HMDB44645, HMDB44829, HMDB45453, HMDB45606, HMDB46231, HMDB46355, HMDB47076                                                                                                                                                                                                                                                                                                                                                                                                                                                                                                                                                                                                                                                                                                                                                                                                                                                                                                                                                                                                                                                                                                                                                                                                                                                                                                                                                                                                                                                                                                                                                                                                                                                                                                          | TG(16:0/24:0/-18:0)         | -0,224627365                    | 3,97934E-05 | 0,00082966        |
| 933,4677023 | HMDB0031364, HMDB31364                                                                                                                                                                                                                                                                                                                                                                                                                                                                                                                                                                                                                                                                                                                                                                                                                                                                                                                                                                                                                                                                                                                                                                                                                                                                                                                                                                                                                                                                                                                                                                                                                                                                                                                                                                                                                                                                                  | Ampelodeside Bsl            | -0,051276437                    | 0,73128965  | 0,866419259       |
| 934,4591869 | HMDB0116045, HMDB0116047, HMDB0116053, HMDB0116169                                                                                                                                                                                                                                                                                                                                                                                                                                                                                                                                                                                                                                                                                                                                                                                                                                                                                                                                                                                                                                                                                                                                                                                                                                                                                                                                                                                                                                                                                                                                                                                                                                                                                                                                                                                                                                                      | CDP-DG(a-13:0/18:2(9Z,11Z)) | 0,024712933                     | 0,294619013 | 0,554876413       |
| 937,8254029 | HMDB0005401, HMDB0005470, HMDB0042232, HMDB0042260, HMDB0042266, HMDB0042435, HMDB0042493, HMDB0042499, HMDB0042615, HMDB0042637, HMDB0042681, HMDB0042696, HMDB0042817, HMDB0043960, HMDB0043986, HMDB0043992, HMDB0044019, HMDB0044176, HMDB0044203, HMDB0044209, HMDB0044235, HMDB0044242, HMDB0044289, HMDB0044323, HMDB0044344, HMDB0044364, HMDB0044404, HMDB0044419, HMDB0044485, HMDB0044505, HMDB0044532, HMDB0044767, HMDB0044798, HMDB0044824, HMDB0044974, HMDB0044980, HMDB0045000, HMDB0045032, HMDB0045039, HMDB0045090, HMDB0045110, HMDB0045141, HMDB0045162, HMDB0045182, HMDB0045220, HMDB0045235, HMDB0045299, HMDB0045318, HMDB0045344, HMDB0045546, HMDB0045570, HMDB0045576, HMDB0045601, HMDB0045719, HMDB0045725, HMDB0045745, HMDB0045751, HMDB0045775, HMDB0045782, HMDB0045794, HMDB0045795, HMDB0045880, HMDB0045900, HMDB0045930, HMDB0045950, HMDB0045951, HMDB0046082, HMDB0046101, HMDB0046272, HMDB0046320, HMDB0046326, HMDB0046350, HMDB0046463, HMDB0046469, HMDB0046492, HMDB0046499, HMDB0046517, HMDB0046524, HMDB0046559, HMDB0046641, HMDB0046660, HMDB0046661, HMDB0046709, HMDB0046835, HMDB0046836, HMDB0047018, HMDB0047024, HMDB0047071, HMDB0047179, HMDB0047185, HMDB0047207, HMDB0047214, HMDB0047294, HMDB0047391, HMDB0047438, HMDB0047559, HMDB0047867, HMDB0047873, HMDB0048036, HMDB0048056, HMDB0048122, HMDB0048190, HMDB0048527, HMDB0048533, HMDB0048553, HMDB0048560, HMDB0048667, HMDB0048708, HMDB0048728, HMDB0048749, HMDB0048792, HMDB0048856, HMDB0049159, HMDB0049165, HMDB0049184, HMDB0049191, HMDB0049272, HMDB0049293, HMDB0049311, HMDB0049351, HMDB0049391, HMDB0049431, HMDB0049492, HMDB0049493, HMDB0049783, HMDB0049789, HMDB0049807, HMDB0049814, HMDB0049891, HMDB0049911, HMDB0049928, HMDB0049966                                                                                                                      | TG(18:0/20:0/20:4(5Z,8:     | -0,159290045                    | 0,030916838 | 0,135509021       |
| 943,5049451 | HMDB0037929, HMDB37929                                                                                                                                                                                                                                                                                                                                                                                                                                                                                                                                                                                                                                                                                                                                                                                                                                                                                                                                                                                                                                                                                                                                                                                                                                                                                                                                                                                                                                                                                                                                                                                                                                                                                                                                                                                                                                                                                  | Tragopogonsaponin M         | -0,014251406                    | 0,307948947 | 0,56847381        |
| 962,4915341 | HMDB0116048, HMDB0116055, HMDB0116080, HMDB0116205                                                                                                                                                                                                                                                                                                                                                                                                                                                                                                                                                                                                                                                                                                                                                                                                                                                                                                                                                                                                                                                                                                                                                                                                                                                                                                                                                                                                                                                                                                                                                                                                                                                                                                                                                                                                                                                      | CDP-DG(18:2(9Z,11Z)/a-15:0) | -0,029020978                    | 0,950220484 | 0,979271001       |
| 967,4156436 | HMDB0039400, HMDB39400                                                                                                                                                                                                                                                                                                                                                                                                                                                                                                                                                                                                                                                                                                                                                                                                                                                                                                                                                                                                                                                                                                                                                                                                                                                                                                                                                                                                                                                                                                                                                                                                                                                                                                                                                                                                                                                                                  | Basellasaponin B            | -0,024483725                    | 0,889251385 | 0,954337611       |
| 969,4498815 | HMDB0010032, HMDB10032                                                                                                                                                                                                                                                                                                                                                                                                                                                                                                                                                                                                                                                                                                                                                                                                                                                                                                                                                                                                                                                                                                                                                                                                                                                                                                                                                                                                                                                                                                                                                                                                                                                                                                                                                                                                                                                                                  | PIP2(16:0/16:0)             | -0,099409436                    | 0,621039249 | 0,791734247       |
| 973,5422167 | HMDB0116802, HMDB0116803, HMDB0116804, HMDB0116833                                                                                                                                                                                                                                                                                                                                                                                                                                                                                                                                                                                                                                                                                                                                                                                                                                                                                                                                                                                                                                                                                                                                                                                                                                                                                                                                                                                                                                                                                                                                                                                                                                                                                                                                                                                                                                                      | CL(8:0/8:0/8:0/13:0)        | -0,052766496                    | 0,18798231  | 0,4246647         |
| 976,6273891 | HMDB0061572, HMDB61572                                                                                                                                                                                                                                                                                                                                                                                                                                                                                                                                                                                                                                                                                                                                                                                                                                                                                                                                                                                                                                                                                                                                                                                                                                                                                                                                                                                                                                                                                                                                                                                                                                                                                                                                                                                                                                                                                  | PS(DiMe(13,5)/DiMe(13,5))   | -0,017396634                    | 0,393576722 | 0,641527233       |
| 979,5473851 | HMDB0040783, HMDB40783                                                                                                                                                                                                                                                                                                                                                                                                                                                                                                                                                                                                                                                                                                                                                                                                                                                                                                                                                                                                                                                                                                                                                                                                                                                                                                                                                                                                                                                                                                                                                                                                                                                                                                                                                                                                                                                                                  | Vinaginsenoside R13         | -0,124984818                    | 0,019973108 | 0,100095114       |
| 981,7928027 | HMDB0045260, HMDB0045281, HMDB0045286, HMDB0045416, HMDB0045421, HMDB0045442, HMDB0045955, HMDB0046071, HMDB0046151, HMDB0046171, HMDB0046176, HMDB0046201, HMDB0046220, HMDB0046226, HMDB0046879, HMDB0046927, HMDB0046975, HMDB0049526, HMDB0049531, HMDB0049546, HMDB0049651, HMDB0050133, HMDB0050138, HMDB0050152, HMDB0050252, HMDB0050545, HMDB0050659, HMDB0050672, HMDB0050677, HMDB0050714, HMDB0050726, HMDB0050732, HMDB0050786, HMDB0050791, HMDB0050804, HMDB0050821, HMDB0050827, HMDB0050833, HMDB0050839, HMDB0051083, HMDB0051094, HMDB0051185, HMDB0051190, HMDB0051202, HMDB0051243, HMDB0051247, HMDB0051253, HMDB0051270, HMDB0051345, HMDB0051360, HMDB0051695, HMDB0051744, HMDB0051793, HMDB0051814, HMDB0051825, HMDB0051830, HMDB0051846, HMDB0051856, HMDB0051862, HMDB0051878, HMDB0051887, HMDB0051894, HMDB0052313, HMDB0052343, HMDB0052709, HMDB0052717, HMDB0052821, HMDB0053039, HMDB0053131, HMDB0053136, HMDB0053157, HMDB0053227, HMDB0053425, HMDB0053430, HMDB0053496, HMDB0053503, HMDB0053508, HMDB0053515, HMDB0053539, HMDB0053545, HMDB0053551, HMDB0053593, HMDB0053616, HMDB0053628, HMDB0053795, HMDB0053800, HMDB0053861, HMDB0053866, HMDB0053872, HMDB0053901, HMDB0053905, HMDB0053967, HMDB0054065, HMDB0054136, HMDB0054141, HMDB0054162, HMDB0054201, HMDB0054222, HMDB0054232, HMDB0054238, HMDB0054288, HMDB0054467, HMDB0054499, HMDB0054503, HMDB0054508, HMDB0054527, HMDB0054536, HMDB0054555, HMDB0054564, HMDB0054573, HMDB0054578, HMDB0054582, HMDB0054596, HMDB0054614, HMDB0054674, HMDB0054722, HMDB0054727, HMDB0054731, HMDB0054736, HMDB0054744, HMDB0054775, HMDB0054797, HMDB0054823, HMDB0054933, HMDB0054938, HMDB0054945, HMDB0055000, HMDB0055015, HMDB0055070, HMDB0055244, HMDB0055292, HMDB0055391, HMDB0055438, HMDB0055443, HMDB0055559, HMDB0055593, HMDB0055602, HMDB0055636, HMDB0055702, HMDB0055705, HMDB0055813 | TG(18:0/22:4(7Z,10Z,13      | 0,05770758                      | 0,768040301 | 0,883342587       |
| 987,5569428 | HMDB0116805, HMDB0116806, HMDB0116834, HMDB0116835, HMDB0116866, HMDB0117427                                                                                                                                                                                                                                                                                                                                                                                                                                                                                                                                                                                                                                                                                                                                                                                                                                                                                                                                                                                                                                                                                                                                                                                                                                                                                                                                                                                                                                                                                                                                                                                                                                                                                                                                                                                                                            | CL(8:0/8:0/8:0/14:0)        | -0,003319228                    | 0,275508598 | 0,541088957       |



Supplementary Appendix  
MIRA Study

---

| m/z         | HMDB ID alternatives                               | Suggested annotation        | Comparison [vegan] - [omnivore] |             |                   |
|-------------|----------------------------------------------------|-----------------------------|---------------------------------|-------------|-------------------|
|             |                                                    |                             | Fold Change (log2)              | p-value     | p-value (BH adj.) |
| 990,5228949 | HMDB0116049, HMDB0116057, HMDB0116098, HMDB0116241 | CDP-DG(18:2(9Z,11Z)/a-17:0) | -0,031545302                    | 0,860016717 | 0,933916037       |
| 997,4820151 | HMDB0010035, HMDB0010059, HMDB10035, HMDB10059     | PIP2(16:0/18:0)             | -0,042614826                    | 0,384571785 | 0,636331303       |

\*p-value is calculated for the comparison between omnivores and vegans using Student's t-test.

**Appendix Table S7: Nutrient intakes in proportion to energy intake**

| Nutrients                   | Omnivore<br><i>N</i> = 24 | Vegetarian<br><i>N</i> = 10 | Vegan<br><i>N</i> = 6   | p-value*<br><i>Omnivore vs. vegan</i> |
|-----------------------------|---------------------------|-----------------------------|-------------------------|---------------------------------------|
| Linoleic acid - g/MJ        | 0.876 [0.529 - 1.42 ]     | 1.75 [0.861 - 2.32 ]        | 2.04 [1.45 - 2.37 ]     | <0.001                                |
| Alpha-linolenic acid - g/MJ | 0.255 [0.111 - 0.41 ]     | 0.499 [0.137 - 0.944 ]      | 0.523 [0.493 - 0.689 ]  | <0.001                                |
| EPA - mg/MJ                 | 7.73 [0.0248 - 56.1 ]     | 0 [0 - 28.7 ]               | 0 [0 - 0 ]              | <0.001                                |
| DHA - mg/MJ                 | 19.2 [2.56 - 169 ]        | 2.58 [0 - 87.7 ]            | 0 [0 - 0 ]              | <0.001                                |
| Cholesterol - g/MJ          | 25.4 [13.2 - 41.7 ]       | 8.22 [0.171 - 67.3 ]        | 0.152 [0.0953 - 0.283 ] | <0.001                                |
| Fiber - g/MJ                | 2.69 [1.69 - 4.3 ]        | 5.07 [2.6 - 5.95 ]          | 4.89 [3.49 - 6.18 ]     | 0.02                                  |
| Thiamine (B1) - mg/MJ       | 0.15 [0.106 - 0.177 ]     | 0.188 [0.116 - 0.536 ]      | 0.239 [0.193 - 0.54 ]   | <0.001                                |
| Riboflavin (B2) - mg/MJ     | 0.29 [0.169 - 0.46 ]      | 0.318 [0.144 - 0.49 ]       | 0.296 [0.168 - 0.483 ]  | 1                                     |
| Niacin (B3) - mg/MJ         | 3.16 [2.28 - 4.45 ]       | 2.79 [2.25 - 5.23 ]         | 3.01 [2.31 - 5.6 ]      | 0.79                                  |
| Pyridoxine (B6) - mg/MJ     | 0.206 [0.132 - 0.343 ]    | 0.2 [0.172 - 0.243 ]        | 0.17 [0.117 - 0.285 ]   | 0.16                                  |
| Folate (B9) - ug/MJ         | 28.3 [20.8 - 45.8 ]       | 52.6 [31 - 83.4 ]           | 62.9 [39.7 - 104 ]      | 0.002                                 |
| Cobalamin (B12) - ug/MJ     | 0.621 [0.322 - 1.4 ]      | 0.55 [0.123 - 1.1 ]         | 0.53 [0.191 - 0.892 ]   | 0.31                                  |
| Vitamin C - mg/MJ           | 15.3 [3.53 - 28.8 ]       | 12.4 [7.22 - 26.9 ]         | 9 [3.68 - 20.1 ]        | 0.16                                  |
| Vitamin A** - ug/MJ         | 87.1 [61.7 - 177 ]        | 100 [54.6 - 112 ]           | 76.4 [49.4 - 97 ]       | 0.58                                  |
| Vitamin D - ug/MJ           | 1.45 [0.867 - 2.31 ]      | 1.5 [0.648 - 2.45 ]         | 1.34 [0.831 - 1.94 ]    | 0.73                                  |
| Vitamin E - mg/MJ           | 1.05 [0.667 - 2.41 ]      | 1.56 [1.43 - 1.93 ]         | 1.7 [1.57 - 2.23 ]      | 0.005                                 |
| Vitamin K - ug/MJ           | 9.71 [4.98 - 16.4 ]       | 15.6 [3.37 - 30.5 ]         | 13.5 [12.2 - 17 ]       | 0.03                                  |
| Sodium - mg/MJ              | 293 [253 - 427 ]          | 276 [227 - 390 ]            | 290 [246 - 334 ]        | 0.31                                  |
| Calcium - mg/MJ             | 171 [103 - 267 ]          | 188 [70.8 - 211 ]           | 140 [106 - 201 ]        | 0.58                                  |
| Potassium - mg/MJ           | 489 [351 - 606 ]          | 402 [269 - 555 ]            | 411 [347 - 455 ]        | 0.11                                  |
| Magnesium - mg/MJ           | 45.9 [35.5 - 64 ]         | 60.9 [43.4 - 67.7 ]         | 59 [49 - 63.5 ]         | 0.03                                  |
| Iron - mg/MJ                | 1.38 [1.12 - 2.35 ]       | 2.2 [1.58 - 2.52 ]          | 2.11 [1.85 - 2.34 ]     | 0.006                                 |
| Iodine - ug/MJ              | 30.8 [17.3 - 46.4 ]       | 15.6 [7.89 - 21.7 ]         | 12.7 [10 - 16.1 ]       | <0.001                                |
| Phosphorus - mg/MJ          | 208 [149 - 254 ]          | 178 [147 - 201 ]            | 146 [121 - 160 ]        | 0.009                                 |
| Zinc - mg/MJ                | 1.45 [1.11 - 1.92 ]       | 1.47 [1.04 - 2.52 ]         | 1.45 [0.991 - 2.46 ]    | 0.66                                  |

\*p-value is calculated for the comparison between omnivores and vegans using age- and sex-adjusted permutation test.

\*\*Vitamin A is presented as retinol activity equivalents (RAE).

**Appendix Table S8: Exact p-values of Figure 4**

| <b>Metabolite</b>                 | <b>p-value*</b> |
|-----------------------------------|-----------------|
| Alpha-linolenic acid (ALA)        | 0.14            |
| Docosahexaenic acid (DHA)         | <b>0.00089</b>  |
| Carnitine 18:3                    | 0.12            |
| Carnitine 18:4                    | <b>0.00012</b>  |
| Carnitine 20:4                    | 0.16            |
| Lysophosphatidylcholine 16:0      | 0.07            |
| Lysophosphatidylcholine 18:1      | <b>0.039</b>    |
| Lysophosphatidylethanolamine 16:0 | 0.79            |
| Lysophosphatidylethanolamine 18:1 | 0.71            |

\*by age- and sex-adjusted permutation tests with Benjamini-Hochberg correction for multiple comparisons.

## References

- S1. Nissinen K, Korkalo L, Vepsäläinen H. Accuracy in the estimation of children's food portion sizes against a food picture book by parents and early educators. *J Nutr Sci.* 2018;**7**:e35.
- S2. Nissinen K, Sillanpää H, Korkalo L, Roos E, Erkkola M. Annoskuvakirja: lasten ruokamäärien arvioinnin avuksi. Helsinki: Helsingin yliopisto : Seinäjoen ammattikorkeakoulu : Samfundet Folkhälsan, 2015.
- S3. Korkalo L, Nissinen K, Skaffari E et al. The Contribution of Preschool Meals to the Diet of Finnish Preschoolers. *Nutrients*, 2019;**11**(7):1531.
- S4. Vásquez-Caicedo AL, Bell S, Hartmann B. D2.2.9 Report on collection of rules on use of recipe calculation procedures including the use of yield and retention factors for imputing nutrient values for composite foods. *European Food Information Resource Network* 2008. Available online: <http://toolbox.foodcomp.info/References/RecipeCalculation/EuroFIR%20recipe%20calculation%20procedures%20including%20yield%20and%20retention%20factors.pdf>
- S5. Engle-Stone R, Haskell MJ, Ndjebayi AO et al. Plasma retinol-binding protein predicts plasma retinol concentration in both infected and uninfected Cameroonian women and children. *J Nutr* 2011;**141**(12):2233–41.
- S6. Talsma EF, Verhoef H, Brouwer ID, Mburu-de Wagt AS, Hulshof PJM, Melse-Boonstra A. Proxy markers of serum retinol concentration, used alone and in combination, to assess population vitamin A status in Kenyan children: a cross-sectional study. *BMC Med* 2015;**13**:30.
- S7. Thas O, De Neve J, Clement L, Ottoy J-P. Probabilistic index models. *Royal Statistical Society.* 2012;**74**(4):623–71.
- S8. De Schryver M, De Neve J. A tutorial on probabilistic index models: Regression models for the effect size  $P(Y1 < Y2)$ . *Psychol Methods.* 2019 Aug;**24**(4):403–18.
- S9. Davison AC, Hinkley DV. Nonparametric permutation tests. In: Davison AC, Hinkley DV. Cambridge: Cambridge University Press; 1997.
- S10. Subramanian A, Tamayo P, Mootha VK, Mukherjee S, Ebert BL et al. Gene set enrichment analysis: a knowledge-based approach for interpreting genome-wide expression profiles. *Proc Natl Acad Sci U S A.* 2005 Oct 25;**102**(43):15545–50.
- S11. Xiang X, Han Y, Neuvonen M, Laitila J, Neuvonen PJ, Niemi M. High performance liquid chromatography-tandem mass spectrometry for the determination of bile acid concentrations in human plasma. *J Chromatogr B Analyt Technol Biomed Life Sci.* 2010 Jan 1;**878**(1):51–60.
- S12. Erhardt JG, Estes JE, Pfeiffer CM, Biesalski HK, Craft NE. Combined Measurement of Ferritin, Soluble Transferrin Receptor, Retinol Binding Protein, and C-Reactive Protein by an Inexpensive, Sensitive, and Simple Sandwich Enzyme-Linked Immunosorbent Assay Technique. *J Nutr.* 2004 Nov;**134**(11):3127–32.
- S13. Miettinen TA, Tilvis RS, Kesaniemi YA. Serum cholestanol and plant sterol levels in relation to cholesterol metabolism in middle-aged men. *Metabolism* 1989;**38**:136-40.
- S14. Miettinen TA, Tilvis RS, Kesaniemi YA. Serum plant sterols and cholesterol precursors reflect cholesterol absorption and synthesis in volunteers of a randomly selected male population. *Am J Epidemiol* 1990; **131**: 20-31.
- S15. Cook JD, Flowers CH, Skikne BS. The quantitative assessment of body iron. *Blood.* 2003 May 1;**101**(9):3359–64.
- S16. \*HUSLAB is an accredited clinical laboratory of Helsinki University Hospital. Their methods and contact information for each method can be found online from HUSLAB manual with reference number for each method (listed in Table S1): [https://huslab.fi/ohjekirja/\[REFERENCENUMBERHERE\].html](https://huslab.fi/ohjekirja/[REFERENCENUMBERHERE].html)

Supplementary Appendix  
MIRA Study

---

S17. \*\*Yhtyneet Medix Laboratoriot webpage has contact information about iodide method, reference number for method used in this study was 1984 (U-I): [https://www.yml.fi/tuotekuvauus\\_show.php?tuotenro=831](https://www.yml.fi/tuotekuvauus_show.php?tuotenro=831)
