# Supplementary material for: Vegan diet in young children remodels metabolism and challenges the statuses of essential nutrients
Source: PubMed Central journal article supplement (PMC7863396; doi:10.15252/emmm.202013492), 2021-01-20
Supplement: EMMM-13-e13492-s002.pdf [file EMMM-13-e13492-s002.pdf]

## Expanded View Figures

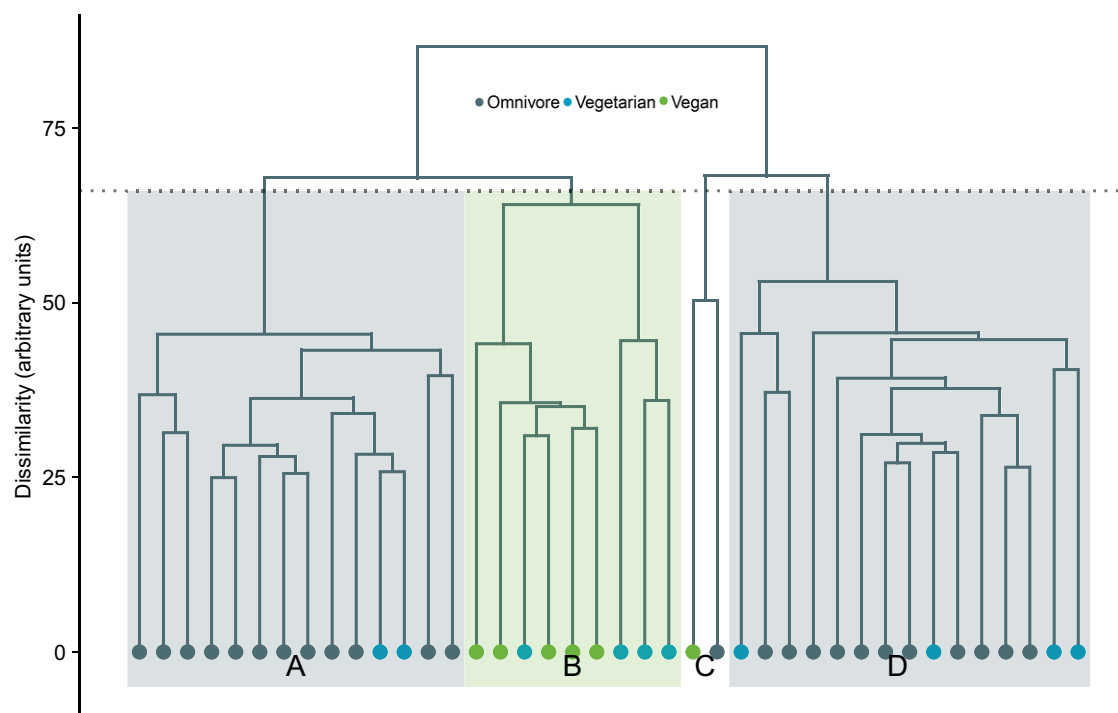

**Figure EV1. Hierarchical clustering of participants based on untargeted biomarkers in blood.**

Hierarchical clustering of participants based on the detected 872 metabolites in untargeted metabolomics from serum. Hierarchical clustering was performed using Ward's method and Euclidean distance as the measure of dissimilarity.  $n = 24$  omnivores, 10 vegetarians, six vegans.

Source data are available online for this figure.
